# Supplementary material
Source: PubMed Central journal article supplement (PMC8130865)
Supplement: NIHMS1695842-supplement-SI.pdf [file NIHMS1695842-supplement-SI.pdf]

# **Temperature-Dependent Reactivity of a Nonheme Fe<sup>III</sup>(OH)(SR) Complex: Relevance to Isopenicillin N Synthase**

Vishal Yadav, Maxime A. Siegler, David P. Goldberg\*

Department of Chemistry, The Johns Hopkins University,  
Baltimore, Maryland 21218, United States

## Table of Contents

|                               |         |
|-------------------------------|---------|
| A. Materials and methods..... | S3-S5   |
| B. Synthetic procedures.....  | S6-S13  |
| C. Experimental section.....  | S14-S18 |
| D. Supporting tables.....     | S19-S48 |
| E. Supporting figures.....    | S49-S94 |
| F. References.....            | S95     |

## A. Materials and methods.

**Materials.** All syntheses and manipulations were conducted in an N<sub>2</sub>-filled drybox (Vacuum Atmospheres, O<sub>2</sub> < 0.2 ppm, H<sub>2</sub>O < 0.5 ppm) or using standard Schlenk techniques under an atmosphere of Ar unless otherwise noted. Fe(OTf)<sub>2</sub> • 2 MeCN and <sup>57</sup>Fe(OTf)<sub>2</sub> • 2 MeCN were prepared according to a literature procedure.<sup>1</sup> Powdered <sup>57</sup>Fe metal (95.93%) was purchased from Cambridge Isotope Laboratories. The *p*-NO<sub>2</sub>-thiophenol, *p*-CF<sub>3</sub>-thiophenol, *p*-NO<sub>2</sub>-phenol were purchased from commercial sources and dried over P<sub>2</sub>O<sub>5</sub> under vacuum before use. Sodium hydride (30 wt% dispersion in mineral oil) was purchased from Sigma-Aldrich, washed several times with hexanes and dried under vacuum prior to use. Methanol, acetonitrile and acetonitrile-*d*<sub>3</sub> were distilled from CaH<sub>2</sub>. Tetrahydrofuran, tetrahydrofuran-*d*<sub>8</sub>, toluene and toluene-*d*<sub>8</sub> were dried over Na/benzophenone and subsequently distilled. All other non-deuterated solvents were obtained from a Pure-solv solvent purification system from Innovative Technologies, Inc. Anhydrous 2-methyltetrahydrofuran and pentane (sure seal) were purchased from Sigma-Aldrich, and distilled over Na/benzophenone. All solvents were degassed by a minimum of three freeze–pump–thaw cycles and stored over freshly activated 3 Å molecular sieves in the drybox following distillation. All other reagents were purchased from commercial vendors and used without further purification. The ligand BNPA<sup>Ph2</sup>OH was prepared by a literature procedure<sup>2</sup> and was dried over P<sub>2</sub>O<sub>5</sub> for 12 h under vacuum before metalation. The complexes Fe<sup>II</sup>(BNPA<sup>Ph2</sup>O)(OTf), <sup>57</sup>Fe<sup>II</sup>(BNPA<sup>Ph2</sup>O)(OTf), Fe<sup>III</sup>(BNPA<sup>Ph2</sup>O)(OH)(OTf), <sup>57</sup>Fe<sup>III</sup>(BNPA<sup>Ph2</sup>O)(OH)(OTf) were synthesized following literature procedures.<sup>2</sup> The tris(*p*-methoxyphenyl)methyl radical was generated in situ following a literature procedure.<sup>3</sup>

**Instrumentation.** The <sup>1</sup>H NMR and <sup>19</sup>F NMR spectra were measured on a Bruker 300 MHz or a Bruker 400 MHz NMR spectrometer. Chemical shifts were referenced to reported solvent resonances.<sup>4</sup> Mössbauer spectra were recorded on a spectrometer from SEE Co. (Edina, MN) operating in the constant acceleration mode in a transmission geometry. The sample was kept in an SVT-400 cryostat from Janis Research Co. (Wilmington, MA), using liquid N<sub>2</sub> as a cryogen for 80 K measurements. Isomer shifts were determined

relative to the centroid of the spectrum of a metallic foil of  $\alpha$ -Fe collected at room temperature. Data analysis was performed using version F of the program WMOSS ([www.wmoss.org](http://www.wmoss.org)), and quadrupole doublets were fit to Lorentzian lineshapes.

### Single Crystal X-ray Crystallography.

**Complexes 1, 2, 3, 4, 5•Li(OTf)(THF), and 6.** All reflection intensities (except for **4**) were measured at 110(2) K using a SuperNova diffractometer (equipped with an Atlas detector) with Mo  $K\alpha$  radiation ( $\lambda = 0.71073 \text{ \AA}$ ) for complexes **1, 2, 3** and **6** or with Cu  $K\alpha$  radiation ( $\lambda = 1.54178 \text{ \AA}$ ) for complex **5•LiOTf** with the program CrysAlisPro (Version CrysAlisPro 1.171.39.29c, Rigaku OD, 2017). For **4**, reflection intensities were measured at 100(2) K using a Rigaku XtaLAB Synergy FR-X diffractometer (equipped with a HyPix-6000HE detector) with Cu  $K\alpha$  radiation ( $\lambda = 1.54178 \text{ \AA}$ ) with the program CrysAlisPro (Version CrysAlisPro 1.171.40.67a, Rigaku OD, 2019). The same program was used to refine the cell dimensions and for data reduction. The structures were solved with the program SHELXS-2018/3 (Sheldrick, 2018) and were refined on  $F^2$  with SHELXL-2018/3 (Sheldrick, 2018).<sup>5</sup> Numerical absorption corrections based on gaussian integration over a multifaceted crystal model were applied using CrysAlisPro for complexes **1, 2, 3** and **6**. Analytical numeric absorption correction using a multifaceted crystal model were applied using CrysAlisPro for complexes **4** and **5•Li(OTf)(THF)**. The temperature of the data collection was controlled using the system Cryojet (manufactured by Oxford Instruments). The H atoms were placed at calculated positions (unless otherwise specified) using the instructions AFIX 23, AFIX 43 or AFIX 137 with isotropic displacement parameters having values 1.2 or 1.5  $U_{eq}$  of the attached C atoms. The H atoms attached to N1, N5, O1 (complex **5•Li(OTf)(THF)** only) and O2 (complexes **3** and **4**) were found from difference Fourier maps, and their coordinates were refined pseudofreely using the DFIX instructions in order to keep the N–H and O–H bond distances within an acceptable range. One of the two neopentylamine arms in **4** is disordered over two orientations, and the occupancy factor of the major component refines to 0.617(5). Additionally, there is a mixture of disordered solvent molecule

(THF/pentane) at one site. The occupancy of the THF molecule (major component) refines to 0.662(7), and the THF is clearly the acceptor in one intermolecular OH...O hydrogen bond.

**DFT calculations.** All calculations were performed with the ORCA-4.1.2 program package.<sup>6</sup> Initial geometries were obtained from X-ray crystallographic models. Optimized geometries were calculated using the B3LYP functional. The 6-311g\* basis set was used for all Fe, N, O, S, F, Li atoms and the 6-31g\* basis set was used for all C and H atoms. Frequency calculations at the same level of theory confirmed that all optimizations had converged to true minima on the potential energy surface (i.e., no imaginary frequencies). The optimized structures using the B3LYP functional were used for Mössbauer parameter calculations for **1** – **7**. Mössbauer parameters were computed using the B3LYP functional<sup>7</sup> and basis sets CP(PPP)<sup>8</sup> for Fe and def2-TZVP<sup>9</sup> for all other atoms. The angular integration grid was set to Grid4 (NoFinalGrid), with increased radial accuracy for the Fe atom (IntAcc 7). A continuum solvation model was included (COSMO), with a solvent of intermediate dielectric (methanol). The isomer shift was obtained from the electron density at the Fe nucleus, using a linear fit function previously reported:  $\delta = \alpha(\rho(0) - c) + \beta$ . For the methodology described here,  $\alpha = -0.424 \text{ au}^3 \text{ mm s}^{-1}$ ,  $\beta = 7.55 \text{ mm s}^{-1}$ , and  $c = 11800 \text{ au}^{-3}$ .<sup>10</sup>

## B. Synthetic procedures.

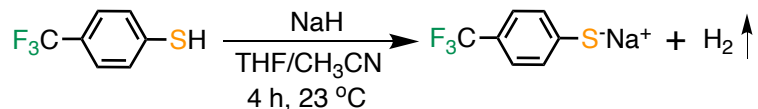

**NaSPh<sup>p-CF<sub>3</sub></sup>**. The starting material *p*-CF<sub>3</sub>-C<sub>6</sub>H<sub>4</sub>SH (183.0 mg, 1.03 mmol) was dissolved in THF and a THF suspension of sodium hydride (24.6 mg, 1.03 mmol, 1 equiv) was added slowly to the thiophenol solution. An immediate color change from pale yellow to pale pink was observed with a strong effervescence indicating H<sub>2</sub> evolution. The reaction mixture was diluted with acetonitrile (2 mL) to ensure complete dissolution of the salt and then stirred for 4 h at 23 °C. The reaction mixture was then filtered over Celite and dried down under vacuum to give a pale yellow solid. The solid was washed with pentane and dried, giving the sodium salt of *p*-trifluoromethylthiophenol (**NaSPh<sup>p-CF<sub>3</sub></sup>**) as a yellow solid (crude, 200 mg, (98%)). This compound was stored at -35 °C in the drybox freezer. <sup>1</sup>H NMR (CD<sub>3</sub>CN, 400 MHz): δ 7.31 (d, 2H), 6.99 (d, 2H), 4.30 (s, 1H) ppm. <sup>19</sup>F NMR (CD<sub>3</sub>CN, 300 MHz): δ -60.18 ppm.

*Caution: Addition of NaH should be done slowly, and it is advised to perform this reaction on a scale of 1 mmol or lower.*

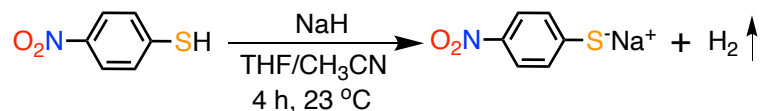

**NaSPh<sup>p-NO<sub>2</sub></sup>**. The starting material *p*-NO<sub>2</sub>-C<sub>6</sub>H<sub>4</sub>SH (142.0 mg, 0.913 mmol) was dissolved in THF and a THF suspension of sodium hydride (22.0 mg, 0.916 mmol, 1 equiv) was added slowly to the thiophenol solution. An immediate color change from pale yellow to blood-red was observed with a strong effervescence indicating H<sub>2</sub> evolution. The reaction mixture was diluted with acetonitrile (2 mL) to ensure complete dissolution of the salt and then stirred for 4 h at 23 °C. The dark red reaction mixture was then filtered over Celite and then dried down under vacuum to give a dark red solid. The solid was washed with pentane and dried, giving the sodium salt of *p*-nitro-thiophenol (**NaSPh<sup>p-NO<sub>2</sub></sup>**) as a dark red solid (crude, 156

mg, (96%). This compound was stored at  $-35\text{ }^{\circ}\text{C}$  in the drybox freezer.  $^1\text{H NMR}$  ( $\text{CD}_3\text{CN}$ , 400 MHz):  $\delta$  7.62 (d, 2H), 7.22 (d, 2H) ppm.

*Caution: Addition of NaH should be done slowly, and it is advised to perform this reaction on a scale of 1 mmol or lower.*

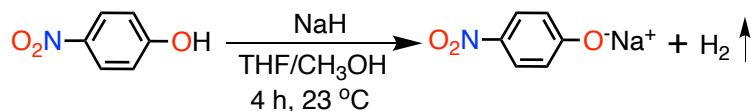

**NaOPh<sup>p-NO<sub>2</sub></sup>.** The starting material *p*-NO<sub>2</sub>-C<sub>6</sub>H<sub>4</sub>OH (500 mg, 3.59 mmol) was dissolved in THF and a THF suspension of sodium hydride (86 mg, 3.61 mmol, 1 equiv) was added slowly to the thiophenol solution. An immediate color change from pale yellow to dark orange was observed with an effervescence indicating H<sub>2</sub> evolution. A small amount of methanol (1 – 2 mL) was added to this turbid reaction mixture and the mixture changed from dark orange to a dark yellow, clear solution. The reaction mixture was stirred for 4 h at 23 °C, and then filtered over Celite, dried and down under vacuum to give a dark orange solid. The solid was washed with pentane and dried, giving the sodium salt of *p*-nitrophenol (**NaOPh<sup>p-NO<sub>2</sub></sup>**) as a dark orange solid (crude, 550 mg, (95%)). This compound was stored at  $-35\text{ }^{\circ}\text{C}$  in the drybox freezer.  $^1\text{H NMR}$  ( $\text{CD}_3\text{CN}$ , 400 MHz):  $\delta$  8.00 (d, 2H), 6.54 (d, 2H) ppm.

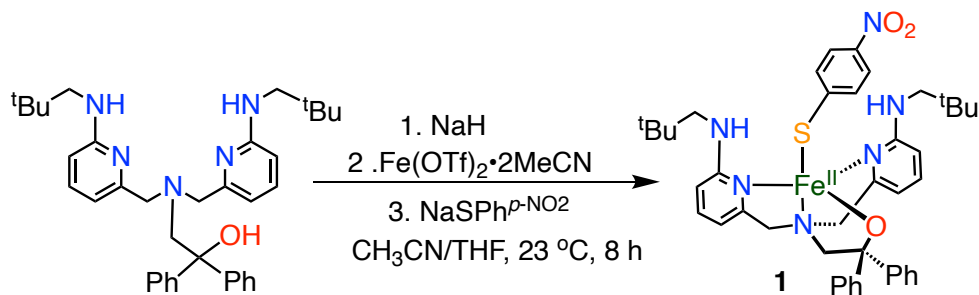

**Fe<sup>II</sup>(BNPA<sup>Ph<sub>2</sub>O</sup>)(SPh<sup>p-NO<sub>2</sub></sup>) (1).** The ligand BNPA<sup>Ph<sub>2</sub>O</sup> (60.0 mg, 0.11 mmol) was dissolved in THF (2 mL) and a suspension of NaH (2.5 mg, 0.11 mmol, 1 equiv) in THF (1 mL) was added. The solution was stirred for 1 h at 23 °C. An amount of anhydrous Fe(OTf)<sub>2</sub> • 2 MeCN (46.0 mg, 0.11 mmol, 1 equiv) was

dissolved in acetonitrile (2 mL) and added dropwise to the BNPA<sup>Ph<sub>2</sub></sup>OH/NaH mixture. An immediate color change from colorless to yellow-green was noted, and the reaction mixture was stirred for 4 h. To this dark yellow solution, an acetonitrile solution of freshly prepared NaSPh<sup>p-NO<sub>2</sub></sup> (18.0 mg, 0.11 mmol, 1 equiv) was added and the reaction mixture was stirred for an additional 4 h at 23 °C. A color change from dark yellow to dark red-brown was noted. The resulting dark red-brown reaction mixture was evaporated to dryness under vacuum, giving a dark brown-red solid. This solid was dissolved in minimum amount of THF (3 mL) and passed twice through Celite to remove any insoluble impurities and the solution was left to stand with slow vapor diffusion of pentane. Dark red crystals (blocks, 60 mg (70%)) suitable for X-ray structure determination were obtained after 2 d. UV-vis (THF)  $\lambda_{\text{max}}$  ( $\epsilon$ , M<sup>-1</sup> cm<sup>-1</sup>) = 330 nm (14400), 458 nm (32600), 590 nm (2630). <sup>1</sup>H NMR (CD<sub>3</sub>CN, 400 MHz):  $\delta$  73.34, 98.14, 56.94, 30.08, 23.72, 21.15, 13.47, 11.98, 9.03, 7.40, 5.22, 4.84, 4.24, 0.91, -12.23 ppm. Anal. Calcd for C<sub>42</sub>H<sub>50</sub>FeN<sub>6</sub>O<sub>3</sub>S: C, 65.11; H, 6.50; N, 10.85. Found: C, 65.35; H, 6.85; N, 10.91.

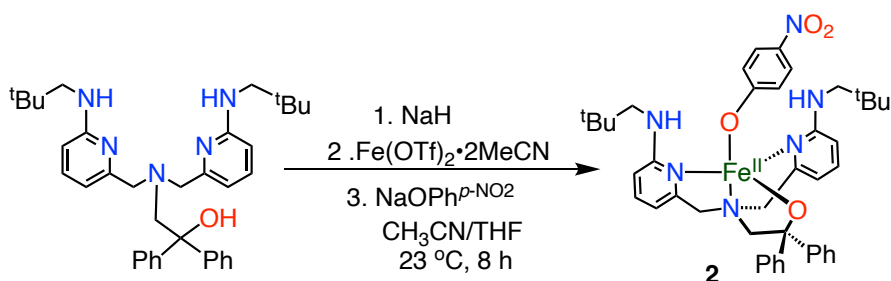

**Fe<sup>II</sup>(BNPA<sup>Ph<sub>2</sub></sup>O)(OPh<sup>p-NO<sub>2</sub></sup>) (2).** The ligand BNPA<sup>Ph<sub>2</sub></sup>OH (60.7 mg, 0.11 mmol, 1 equiv) was dissolved in THF (2 mL) and a suspension of NaH (2.5 mg, 0.11 mmol, 1 equiv) in THF (1 mL) was added. The solution was stirred for 1 h at 23 °C. An amount of anhydrous Fe(OTf)<sub>2</sub> · 2 MeCN (46.0 mg, 0.11 mmol, 1 equiv) was dissolved in acetonitrile (2 mL) and added dropwise to the BNPA<sup>Ph<sub>2</sub></sup>OH/NaH mixture. An immediate color change from colorless to yellow-green was noted, and the reaction mixture was stirred for 4 h. To this dark yellow solution, a acetonitrile slurry of freshly prepared NaOPh<sup>p-NO<sub>2</sub></sup> (17.0 mg, 0.11 mmol, 1 equiv) was added and the reaction mixture was stirred for an additional 4 h at 23 °C. A color change from dark yellow to dark brown was noted. The resulting dark brown reaction mixture was evaporated to dryness



under vacuum giving a dark brown solid, which was washed with pentane and dried. The brown solid was dissolved in THF and filtered through Celite, and the solution was left to stand with slow vapor diffusion of pentane. Orange-brown crystals (blocks, 50 mg (62%)) suitable for X-ray structure determination were obtained after 1 d. UV-vis (THF)  $\lambda_{\text{max}}$  ( $\epsilon$ ,  $\text{M}^{-1} \text{cm}^{-1}$ ) = 342 nm (35900).  $^1\text{H}$  NMR ( $\text{CD}_3\text{CN}$ , 400 MHz):  $\delta$  77.07, 68.04, 64.35, 61.71, 25.54, 23.85, 20.33, 12.30, 9.74, 7.26, 4.88, 1.49, 1.31, 0.91, -10.76 ppm. Anal. Calcd for  $\text{C}_{42}\text{H}_{50}\text{FeN}_6\text{O}_4$ : C, 66.49; H, 6.64; N, 11.08. Found: C, 66.12; H, 6.88; N, 10.78.

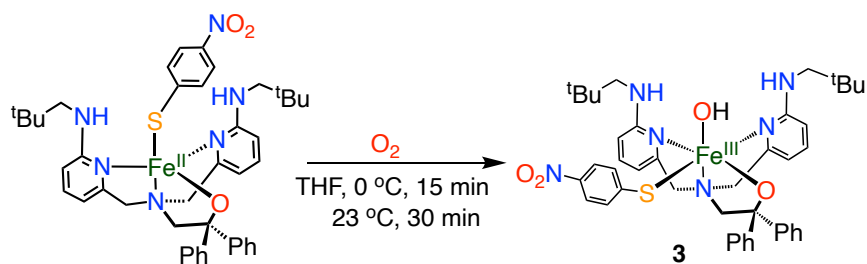

**$\text{Fe}^{\text{III}}(\text{BNPA}^{\text{Ph}_2\text{O}})(\text{OH})(\text{SPh}^{\text{p-NO}_2})$  (3).** Microcrystalline **1** (20.0 mg, 0.025 mmol) was dissolved in THF (5 – 10 mL), and cooled to 0 °C. This solution was bubbled with excess, dry  $\text{O}_2$  for 15 min, causing a rapid color change from orange to dark red. The solution was warmed up to 23 °C and stirred for 30 min. The final dark red solution was evaporated to dryness under vacuum to give a dark red solid. This solid was washed with pentane to give a dark red powder, which was then dissolved in THF and left to stand with slow vapor diffusion of pentane at -35 °C in a drybox freezer. Dark red crystals suitable for X-ray structure determination were obtained after 15 d. UV-vis (THF)  $\lambda_{\text{max}}$  ( $\epsilon$ ,  $\text{M}^{-1} \text{cm}^{-1}$ ) = 325 nm (17000), 414 nm (17900), 477 nm (21600), 600 nm (1754).  $^1\text{H}$  NMR ( $\text{CD}_3\text{CN}$ , 400 MHz):  $\delta$  76.87, 54.59, 38.39, 15.55, 7.96, 7.58, 4.83, 4.24, 2.03 ppm.

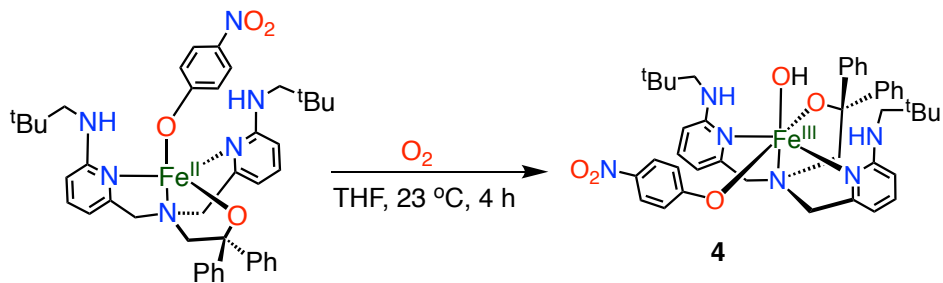

**Fe<sup>III</sup>(BNPA<sup>Ph<sub>2</sub>O</sup>)(OH)(OPh<sup>p-NO<sub>2</sub></sup>) (4).** Crystalline **2** (40.0 mg, 0.052 mmol) was dissolved in THF (5 – 10 mL), and this solution was bubbled with excess, dry O<sub>2</sub> for 15 min, causing a color change from yellow-brown to dark red-brown. The reaction was stirred for 4 h at 23 °C, and the final dark red solution was evaporated to dryness under vacuum to give a dark red solid. This solid was dissolved in THF and filtered through Celite to remove insoluble material. The resulting dark red filtrate was evaporated to dryness under vacuum and washed with pentane to give a dark red powder, which was dissolved in THF and the solution was left to stand with slow vapor diffusion of pentane at -35 °C in a drybox freezer. Dark red crystals suitable for X-ray structure determination were obtained after 10 d. UV-vis (THF)  $\lambda_{\text{max}}$  ( $\epsilon$ , M<sup>-1</sup> cm<sup>-1</sup>) = 330 nm (24600), 373 nm (28200), 398 nm (27700), 600 nm (1754). <sup>1</sup>H NMR (CD<sub>3</sub>CN, 400 MHz):  $\delta$  74.00, 50.83, 42.18, 14.89, 7.28, 3.67, 1.31 ppm. Anal. Calcd for C<sub>42</sub>H<sub>51</sub>FeN<sub>6</sub>O<sub>5</sub>: C, 65.16; H, 7.01; N, 11.07. Found: C, 65.58; H, 6.85; N, 11.21.

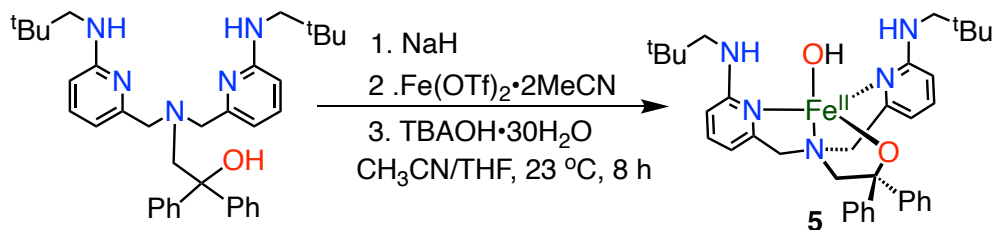

**Fe<sup>II</sup>(BNPA<sup>Ph<sub>2</sub>O</sup>)(OH) (5).** The ligand BNPA<sup>Ph<sub>2</sub>O</sup> (58.7 mg, 0.11 mmol) was dissolved in THF (2 mL) and a suspension of NaH (2.5 mg, 0.11 mmol, 1 equiv) in THF (1 mL) was added. The solution was stirred for 1 h at 23 °C. An amount of anhydrous Fe(OTf)<sub>2</sub>·2MeCN (46.5 mg, 0.11 mmol, 1 equiv) was dissolved

in acetonitrile (2 mL) and added dropwise to the BNPA<sup>Ph2</sup>OH/NaH mixture. An immediate color change from colorless to yellow-green was noted, and the reaction mixture was stirred for 4 h. To this dark yellow solution, an acetonitrile solution of Bu<sub>4</sub>NOH • 30 H<sub>2</sub>O was added and the reaction mixture was stirred for an additional 4 h. A color change from dark yellow to dark orange was noted. The resulting bright orange reaction mixture was evaporated to dryness under vacuum to give an orange solid, which was washed multiple times first with hexanes and then diethyl ether. The solid was dissolved in a minimum amount of THF (3 mL) and passed twice through Celite to remove insoluble impurities. The final residue was dried to give an orange powder (crude, 65 mg). UV-vis (THF)  $\lambda_{\text{max}}$  ( $\epsilon$ , M<sup>-1</sup> cm<sup>-1</sup>) = 325 nm (9560). <sup>1</sup>H NMR (CD<sub>3</sub>CN, 400 MHz):  $\delta$  84.78, 74.96, 63.88, 56.13, 23.11, 16.44, 11.32, 8.89, 8.06, 3.83, 1.00 ppm.

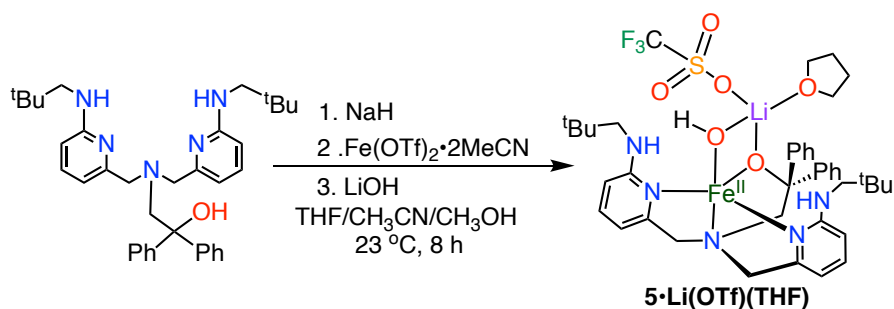

**Fe<sup>II</sup>(BNPA<sup>Ph2</sup>O)(OH)•Li(OTf)(THF) (5•Li(OTf)(THF))**. The ligand BNPA<sup>Ph2</sup>OH (58.7 mg, 0.11 mmol) was dissolved in THF (2 mL) and a suspension of NaH (2.5 mg, 0.11 mmol, 1 equiv) in THF (1 mL) was added. The solution was stirred for 1 h at 23 °C. An amount of anhydrous Fe(OTf)<sub>2</sub> • 2 MeCN (46.0 mg, 0.11 mmol) was dissolved in acetonitrile (2 mL) and added dropwise to the BNPA<sup>Ph2</sup>OH/NaH mixture. An immediate color change from colorless to yellow-green was noted, and the reaction mixture was stirred for 4 h. To this dark yellow solution, a methanolic solution of lithium hydroxide (2.2 mg, 0.11 mmol, 1 equiv) was added and the reaction mixture was stirred for an additional 4 h. A color change from dark yellow to dark orange was noted. The resulting bright orange reaction mixture was evaporated to dryness under vacuum giving an orange solid, which was washed with pentane. The orange solid was dissolved in THF and filtered through Celite, and the solution was left to stand with slow vapor diffusion of pentane. Orange crystals (blocks, 55 mg (63%)) suitable for X-ray structure determination were obtained after 1 d. UV-vis

(THF)  $\lambda_{\text{max}}$  ( $\epsilon$ ,  $\text{M}^{-1} \text{cm}^{-1}$ ) = 330 nm (11700), 480 nm (610).  $^1\text{H}$  NMR (crude,  $\text{CD}_3\text{CN}$ , 400 MHz):  $\delta$  77.21, 73.17, 66.33, 31.99, 18.94, 10.53, 7.93, 6.19, 3.67, 0.35 ppm. Anal. Calcd for  $\text{C}_{41}\text{H}_{55}\text{F}_3\text{FeLiN}_5\text{O}_6\text{S}$ : C, 56.92; H, 6.43; N, 8.69. Found: C, 57.07; H, 6.49; N, 8.71.

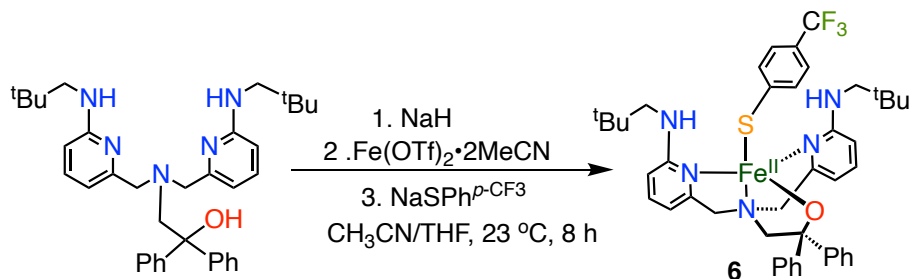

**$\text{Fe}^{\text{II}}(\text{BNPA}^{\text{Ph}_2\text{O}})(\text{SPh}^{\text{p-CF}_3})$  (**6**).** The ligand  $\text{BNPA}^{\text{Ph}_2\text{OH}}$  (60.0 mg, 0.11 mmol) was dissolved in THF (2 mL) and a suspension of NaH (2.5 mg, 0.11 mmol, 1 equiv) in THF (1 mL) was added. The solution was stirred for 1 h at 23 °C. An amount of anhydrous  $\text{Fe}(\text{OTf})_2 \cdot 2\text{MeCN}$  (46.0 mg, 0.11 mmol, 1 equiv) was dissolved in acetonitrile (2 mL) and added dropwise to the  $\text{BNPA}^{\text{Ph}_2\text{OH}}/\text{NaH}$  mixture. An immediate color change from colorless to yellow-green was noted, and the reaction mixture was stirred for 4 h. To this dark yellow solution, an acetonitrile solution of freshly prepared  $\text{NaSPh}^{\text{p-CF}_3}$  (22.0 mg, 0.11 mmol, 1 equiv) was added and the reaction mixture was stirred for an additional 4 h at 23 °C. A color change from dark yellow to dark orange-yellow was noted. The resulting dark orange-yellow reaction mixture was evaporated to dryness under vacuum, giving a dark yellow solid. This solid was dissolved in minimum amount of THF (3 mL) and passed twice through Celite to remove any insoluble impurities and the solution was left to stand with slow vapor diffusion of pentane. Dark yellow crystals (blocks, 50 mg (60%)) suitable for X-ray structure determination were obtained after 1 d. UV-vis (THF)  $\lambda_{\text{max}}$  ( $\epsilon$ ,  $\text{M}^{-1} \text{cm}^{-1}$ ) = 314 nm (19400).  $^1\text{H}$  NMR ( $\text{CD}_3\text{CN}$ , 400 MHz):  $\delta$  70.84, 66.20, 56.65, 29.69, 13.46, 12.00, 8.88, 7.38, 6.10, 0.90, -11.70, -14.67 ppm. Anal. Calcd for  $\text{C}_{43}\text{H}_{50}\text{F}_3\text{FeN}_5\text{OS}$ : C, 64.74; H, 6.38; N, 8.78. Found: C, 62.99; H, 5.93; N, 8.41.

*The yellow crystals of 6 co-crystallize with a small amount of white crystals, which is likely NaOTf based on our experience with these iron complexes. Attempts at multiple recrystallizations did not remove all of*

the suspected NaOTf and although manual separation of **6** for elemental analysis was performed, some NaOTf impurity likely remained.

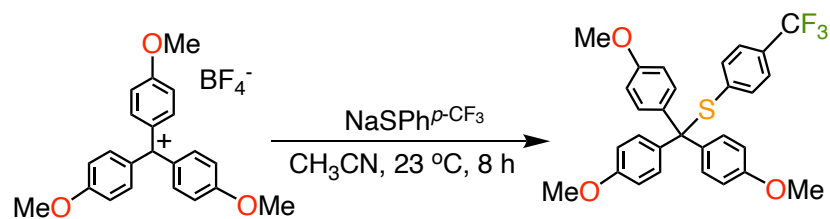

$(p\text{-OMe-C}_6\text{H}_4)_3\text{CSPH}^{p\text{-CF}_3}$ .  $(p\text{-OMe-C}_6\text{H}_4)_3\text{CBF}_4$  was synthesized using a literature procedure.<sup>11</sup> To an acetonitrile solution of  $(p\text{-OMe-C}_6\text{H}_4)_3\text{CBF}_4$  (50 mg, 0.118 mmol), an acetonitrile solution of  $\text{NaSPh}^{p\text{-CF}_3}$  (25 mg, 0.142 mmol, 1.2 equiv) was added and the reaction mixture was stirred for 8 h at  $23\text{ }^\circ\text{C}$ . A color change from dark red to pink was noted. The reaction mixture was dried over vacuum to give a pink solid. The solid was then redissolved in a small amount of dichloromethane and purified using silica gel column chromatography (5-10% EtOAc/hexanes), giving the thioether product as a yellow solid (45 mg, (80%)).  $^1\text{H NMR}$  ( $\text{CD}_2\text{Cl}_2$ , 400 MHz):  $\delta$  7.32 (m, 8H), 7.10 (d, 2H), 6.86 (d, 6H) ppm.  $^{19}\text{F NMR}$  ( $\text{CD}_2\text{Cl}_2$ , 300 MHz): -60.34 ppm.

## C. Experimental Procedures.

**Preparation of  $^{57}\text{Fe}$ -enriched  $\text{Fe}^{\text{II}}(\text{BNPA}^{\text{Ph}_2\text{O}})(\text{SPh}^{p\text{-NO}_2})$  (**1**) and  $\text{Fe}^{\text{II}}(\text{BNPA}^{\text{Ph}_2\text{O}})(\text{OPh}^{p\text{-NO}_2})$  (**2**) for Mössbauer spectroscopy.** Crystalline  $^{57}\text{Fe}^{\text{II}}(\text{BNPA}^{\text{Ph}_2\text{O}})(\text{OTf})$  (3 mg) was dissolved in  $\text{CH}_3\text{CN}$  (500  $\mu\text{L}$ , 8 mM) and  $\text{NaXPh}^{p\text{-NO}_2}$  ( $X = \text{S}, \text{O}$ ) (1 equiv) was added causing a color change from colorless to dark orange. The completion of the reaction was verified by  $^1\text{H}$  NMR spectroscopy. The solvent was removed, and the solid was dissolved in 2-MeTHF (300  $\mu\text{L}$ , 11 mM) and transferred to a Mössbauer cup. The sample was then frozen in liquid nitrogen, and Mössbauer spectra were collected at 80 K in the absence of an external magnetic field. Mössbauer parameters (2-MeTHF, 80 K):  $\delta = 0.94$ ,  $|\Delta E_{\text{Q}}| = 2.87 \text{ mm s}^{-1}$ ,  $\Gamma_{\text{L}} = \Gamma_{\text{R}} = 0.34$  for **1**, and  $\delta = 1.03$ ,  $|\Delta E_{\text{Q}}| = 2.76 \text{ mm s}^{-1}$ ,  $\Gamma_{\text{L}} = \Gamma_{\text{R}} = 0.28$  for **2**.

**Preparation of  $^{57}\text{Fe}$ -enriched  $\text{Fe}^{\text{II}}(\text{BNPA}^{\text{Ph}_2\text{O}})(\text{OH})$  (**5**) and **5•LiOTf** for Mössbauer spectroscopy.** Crystalline  $^{57}\text{Fe}^{\text{II}}(\text{BNPA}^{\text{Ph}_2\text{O}})(\text{OTf})$  (3 mg) was dissolved in  $\text{CH}_3\text{CN}$  (500  $\mu\text{L}$ , 8 mM) and  $\text{TBAOH} \cdot 30 \text{ H}_2\text{O}$  (for **5**) or  $\text{LiOH}$  (for **5•LiOTf**) (1 equiv) was added causing a color change from colorless to dark orange. The completion of the reaction was verified by  $^1\text{H}$  NMR spectroscopy. The solvent was removed, the solid was redissolved in 2-MeTHF (300  $\mu\text{L}$ , 11 mM) and transferred to a Mössbauer cup. The sample was then frozen in liquid nitrogen, and Mössbauer spectra were collected at 80 K in the absence of an external magnetic field. Mössbauer parameters (2-MeTHF, 80 K):  $\delta = 1.01$ ,  $|\Delta E_{\text{Q}}| = 2.38 \text{ mm s}^{-1}$ ,  $\Gamma_{\text{L}} = \Gamma_{\text{R}} = 0.34$  for **5**, and  $\delta = 1.00$ ,  $|\Delta E_{\text{Q}}| = 2.56 \text{ mm s}^{-1}$ ,  $\Gamma_{\text{L}} = \Gamma_{\text{R}} = 0.32$  for **5•LiOTf**.

**Preparation of  $^{57}\text{Fe}$  enriched  $\text{Fe}^{\text{III}}(\text{BNPA}^{\text{Ph}_2\text{O}})(\text{OH})(\text{SPh}^{p\text{-NO}_2})$  (**3**) and  $\text{Fe}^{\text{III}}(\text{BNPA}^{\text{Ph}_2\text{O}})(\text{OH})(\text{OPh}^{p\text{-NO}_2})$  (**4**) for Mössbauer spectroscopy.** The complexes  $^{57}\text{Fe}^{\text{II}}(\text{BNPA}^{\text{Ph}_2\text{O}})(\text{XPh}^{p\text{-NO}_2})$  (**1**:  $X = \text{S}$ , **2**:  $X = \text{O}$ ) were prepared as discussed above. To these  $\text{Fe}^{\text{II}}$  complexes in THF, dry  $\text{O}_2$  was added for 15 min and a color change to dark red was observed. The completion of the reaction was verified by  $^1\text{H}$  NMR spectroscopy. The solvent was removed directly in the Mössbauer cup to give a solid film, which was then frozen in liquid nitrogen. Mössbauer spectra were collected at 80 K in the absence of an external magnetic field. Mössbauer

parameters (solid film, 80 K):  $\delta = 0.42$ ,  $|\Delta E_Q| = 0.96 \text{ mm s}^{-1}$ ,  $\Gamma_L = \Gamma_R = 0.67$  for **3**, and  $\delta = 0.47$ ,  $|\Delta E_Q| = 1.01 \text{ mm s}^{-1}$ ,  $\Gamma_L = \Gamma_R = 0.71$  for **4**.

**Preparation of Fe<sup>II</sup>(BNPA<sup>Ph2O</sup>)(SPh<sup>p-CF<sub>3</sub></sup>) (**6**) in situ for <sup>1</sup>H NMR and Mössbauer spectroscopies.**

Crystalline Fe<sup>II</sup>(BNPA<sup>Ph2O</sup>)(OTf) (3 mg) was dissolved in CH<sub>3</sub>CN (500  $\mu$ L, 8 mM) and NaSPh<sup>p-CF<sub>3</sub></sup> in THF (1 equiv) was added at 23 °C. An immediate color change from pale yellow to dark yellow was observed, and the reaction mixture was dried under vacuum. Analysis by <sup>1</sup>H NMR in CD<sub>3</sub>CN confirmed formation of Fe<sup>II</sup>(BNPA<sup>Ph2O</sup>)(SPh<sup>p-CF<sub>3</sub></sup>) (**6**). Mössbauer samples were prepared similarly with <sup>57</sup>Fe-enriched samples. Spectra were collected at 80 K in the absence of an external magnetic field. Mössbauer parameters (2-MeTHF, 80 K):  $\delta = 0.94$ ,  $|\Delta E_Q| = 2.87 \text{ mm s}^{-1}$ ,  $\Gamma_L = \Gamma_R = 0.34$ .

**Preparation of Fe<sup>III</sup>(BNPA<sup>Ph2O</sup>)(OH)(SPh<sup>p-CF<sub>3</sub></sup>) (**7**) in situ for <sup>1</sup>H NMR and Mössbauer spectroscopies.**

Crystalline Fe<sup>III</sup>(BNPA<sup>Ph2O</sup>)(OH)(OTf) (3 mg) was dissolved in CD<sub>3</sub>CN (500  $\mu$ L, 8 mM) in an NMR tube and precooled in a cold bath at -40 °C and NaSPh<sup>p-CF<sub>3</sub></sup> in CD<sub>3</sub>CN (1 equiv) was added. An immediate color change from orange to dark red was observed. <sup>1</sup>H NMR spectra were recorded at -40 °C and confirmed the formation of Fe<sup>III</sup>(BNPA<sup>Ph2O</sup>)(OH)(SPh<sup>p-CF<sub>3</sub></sup>) (**7**). Mössbauer samples were prepared similarly using <sup>57</sup>Fe-enriched samples. Spectra were collected at 80 K in the absence of an external magnetic field. Mössbauer parameters (2-MeTHF, 80 K):  $\delta = 0.47$ ,  $|\Delta E_Q| = 0.84 \text{ mm s}^{-1}$ ,  $\Gamma_L = \Gamma_R = 0.59$ . Complex **7** was not amenable to crystallization. Spectroscopic characterization (<sup>1</sup>H NMR, <sup>57</sup>Fe-Mössbauer) of **7** generated in situ, together with DFT calculations, was fully consistent with the proposed structure. Complex **7** was found to be less stable than **3**, decomposing at 23 °C in ~15 min. However, **7** is stable for at least several hours at -20 °C, allowing for low temperature experiments.

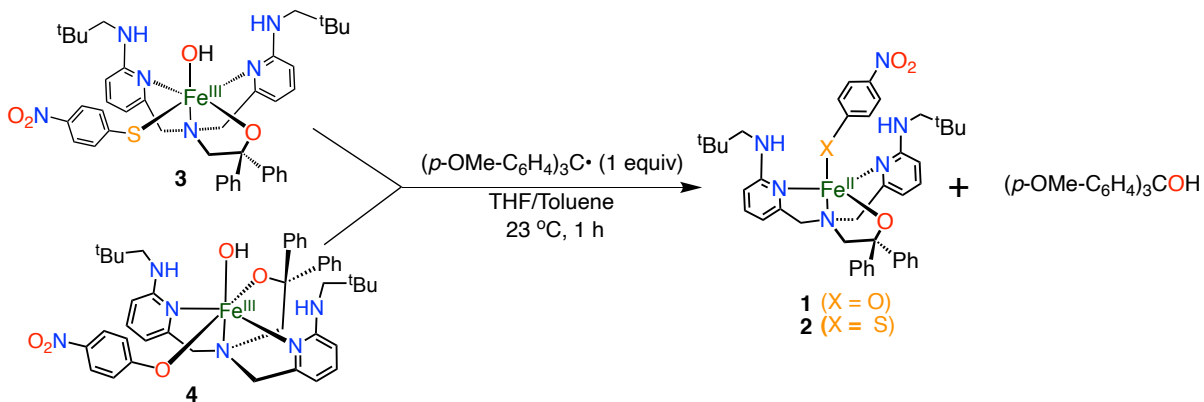

**Reaction between 3 or 4 and  $(p\text{-OMe-C}_6\text{H}_4)_3\text{C}\cdot$  at 23 °C.** Complex **3** or **4** (3.5 mg, 0.004 mmol) was dissolved in THF (600  $\mu\text{L}$ ). A solution of the radical  $(p\text{-OMe-C}_6\text{H}_4)_3\text{C}\cdot$  in toluene- $d_8$  was freshly prepared according to a literature procedure,<sup>3</sup> and 1 equiv of radical was added to **3** or **4** in THF. The reaction was stirred for 30 min, and then the solvent was removed under vacuum to give an orange residue, which was dissolved in  $\text{CD}_3\text{CN}$  and analyzed by  $^1\text{H}$  NMR spectroscopy. The  $^1\text{H}$  NMR spectrum showed complete disappearance of the broad, paramagnetically shifted peaks for **3** or **4**, and appearance of the relatively sharp, paramagnetically shifted peaks corresponding to **1** or **2**. For analysis by Mössbauer spectroscopy, complex **3** or **4** was enriched in  $^{57}\text{Fe}$  (95.93%) and 2-MeTHF was employed in place of  $\text{CD}_3\text{CN}$  because it gives a sharp, better resolved quadrupole doublet for the Mössbauer spectrum of **1** or **2**. The Mössbauer spectrum (80 K) of the final reaction mixture showed a sharp quadrupole doublet with  $\delta = 0.96$ ,  $|\Delta E_Q| = 2.83 \text{ mm s}^{-1}$  assigned to **1**, or  $\delta = 1.04$ ,  $|\Delta E_Q| = 2.79 \text{ mm s}^{-1}$  assigned to **2**. The organic products were analyzed by  $^1\text{H}$  NMR spectra on reactions of slightly larger scale (5 mg, 0.006 mmol).

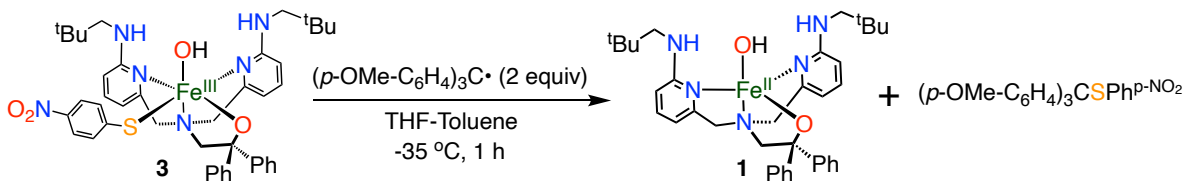

**Reaction between 3 and  $(p\text{-OMe-C}_6\text{H}_4)_3\text{C}\cdot$  at -35 °C.** Complex **3** (3.0 mg, 0.004 mmol) was dissolved in THF (600  $\mu\text{L}$ ) and cooled to -35 °C. A solution of radical  $(p\text{-OMe-C}_6\text{H}_4)_3\text{C}\cdot$  in toluene- $d_8$  was freshly



prepared according to a literature procedure,<sup>3</sup> cooled to -35 °C, and 1 equiv was added to the precooled solution of **3** in THF. The reaction was allowed to stand in a drybox freezer (-35 °C) for 1 h, and then the solvent was removed under vacuum to give an orange residue, which was dissolved in CD<sub>3</sub>CN and analyzed by <sup>1</sup>H NMR spectroscopy. The <sup>1</sup>H NMR spectrum showed complete disappearance of the broad, paramagnetically shifted peaks for **3**, and appearance of the relatively sharp, paramagnetically shifted peaks corresponding to **5**. For analysis by Mössbauer spectroscopy, complex **3** was enriched in <sup>57</sup>Fe (95.93%) and 2-MeTHF was employed in place of CD<sub>3</sub>CN because it gives a sharp, better resolved quadrupole doublet for the Mössbauer spectrum of **5**. The Mössbauer spectrum (80 K) of the final reaction mixture showed a sharp quadrupole doublet ( $\delta = 1.00$ ,  $|\Delta E_Q| = 2.37$  mm s<sup>-1</sup>, 85% of the fit) corresponding to **5**.

**Reaction between 7 and (*p*-OMe-C<sub>6</sub>H<sub>4</sub>)<sub>3</sub>C• at -35 °C.** Complex **7** was prepared in situ in THF (600  $\mu$ L) by adding 1 equiv of NaSPh<sup>*p*-CF<sub>3</sub></sup> to Fe<sup>III</sup>(BNPA<sup>Ph<sub>2</sub>O</sup>)(OH)(OTf) in THF at -35 °C. The formation of **7** was confirmed by UV-vis and <sup>1</sup>H NMR spectroscopy. To the solution of **7** was added (*p*-OMe-C<sub>6</sub>H<sub>4</sub>)<sub>3</sub>C• (1 equiv) at -35 °C. The reaction was allowed to stand in a drybox freezer (-35 °C) for 1 h, and then the solvent was removed under vacuum to give an orange residue, which was dissolved in CD<sub>3</sub>CN and analyzed by <sup>1</sup>H NMR spectroscopy. The <sup>1</sup>H NMR spectrum showed complete disappearance of the broad, paramagnetically shifted peaks for **3**, and appearance of the relatively sharp, paramagnetically shifted peaks corresponding to **5**. The organic products were analyzed by running the reaction on a larger scale (25 mg, 0.030 mmol of **7**). Workup involved dissolving the crude reaction products in ethyl acetate and filtering through a small plug of silica gel to remove impurities. The ethyl acetate was then removed under vacuum, and the crude solid was purified by silica gel column chromatography (95:5 hexane:EtOAc v/v) to give (*p*-OMe-C<sub>6</sub>H<sub>4</sub>)<sub>3</sub>CSPh<sup>*p*-CF<sub>3</sub></sup> as a yellow solid (12 mg, 78%). <sup>1</sup>H NMR (CD<sub>2</sub>Cl<sub>2</sub>, 400 MHz)  $\delta$  7.29 (m, 8H), 7.13 (d, 2H) 6.93 (d, 6H), 3.80 (s, 9H) ppm. <sup>19</sup>F NMR (CD<sub>2</sub>Cl<sub>2</sub>, 300 MHz)  $\delta$  -60.33 ppm.

**Reaction between 1:1 mixture of 3 and 4 with (*p*-OMe-C<sub>6</sub>H<sub>4</sub>)<sub>3</sub>C• at -35 °C.** Complexes **3** (4.0 mg) and **4** (3.8 mg) were dissolved in 500  $\mu$ L of THF separately (5 mM) and combined at -35 °C. To the 1:1 mixture

of **3** and **4** was added (*p*-OMe-C<sub>6</sub>H<sub>4</sub>)<sub>3</sub>C• (1 equiv) at -35 °C. The reaction was allowed to stand in a drybox freezer (-35 °C) for 1 h, and then the solvent was removed under vacuum to give an orange residue, which was dissolved in CD<sub>3</sub>CN and analyzed by <sup>1</sup>H NMR spectroscopy. The <sup>1</sup>H NMR spectrum showed complete disappearance of the broad, paramagnetically shifted peaks for **4**, and appearance of the relatively sharp, paramagnetically shifted peaks corresponding to **2**. The <sup>1</sup>H NMR spectrum also showed the broad, paramagnetically shifted peaks for unreacted **3** as well as minor peaks corresponding to the sulfur transfer product **5**.

**Reaction between 1:1 mixture of 3 and 4 with (*p*-OMe-C<sub>6</sub>H<sub>4</sub>)<sub>3</sub>C• at 23 °C.** Complexes **3** (4.0 mg) and **4** (3.8 mg) were dissolved in THF separately (1 mL, 5 mM) and mixed together. To the 1:1 mixture of **3** and **4** was added (*p*-OMe-C<sub>6</sub>H<sub>4</sub>)<sub>3</sub>C• (1 equiv) at 23 °C and was allowed to stand at 23 °C for 1 h, and then the solvent was removed under vacuum to give an orange residue, which was dissolved in CD<sub>3</sub>CN and analyzed by <sup>1</sup>H NMR spectroscopy. The <sup>1</sup>H NMR spectrum showed complete disappearance of the broad, paramagnetically shifted peaks for **4**, and appearance of the relatively sharp, paramagnetically shifted peaks corresponding to **2**. The <sup>1</sup>H NMR spectrum also showed complete retention of the broad, paramagnetically shifted peaks for unreacted **3**.

**D. Supporting Tables** Table S1. Comparison of metrical parameters obtained from single crystal X-ray crystallography and DFT calculations for **1**, **2** and **6**.

|                     | Complex <b>1</b> (X = SPh <sup>p</sup> -NO <sub>2</sub> ) <sup>a</sup> |                                             | Complex <b>2</b> (X = OPh <sup>p</sup> -NO <sub>2</sub> ) |                                             | Complex <b>6</b> (X = SPh <sup>p</sup> -CF <sub>3</sub> ) |                                             |
|---------------------|------------------------------------------------------------------------|---------------------------------------------|-----------------------------------------------------------|---------------------------------------------|-----------------------------------------------------------|---------------------------------------------|
| <b>Bond lengths</b> | Bond lengths (Å) and bond angles (°) by XRD                            | Bond lengths (Å) and bond angles (°) by DFT | Bond lengths (Å) and bond angles (°) by XRD               | Bond lengths (Å) and bond angles (°) by DFT | Bond lengths (Å) and bond angles (°) by XRD               | Bond lengths (Å) and bond angles (°) by DFT |
| Fe1–N2              | 2.203(2)                                                               | 2.226                                       | 2.1457(16)                                                | 2.192                                       | 2.2006(12)                                                | 2.219                                       |
| Fe1–N3              | 2.206(2)                                                               | 2.243                                       | 2.1927(15)                                                | 2.252                                       | 2.2086(12)                                                | 2.319                                       |
| Fe1–N4              | 2.249(2)                                                               | 2.152                                       | 2.2133(16)                                                | 2.238                                       | 2.2469(12)                                                | 2.239                                       |
| Fe1–O1              | 1.926(19)                                                              | 1.888                                       | 1.9270(13)                                                | 1.913                                       | 1.9223(10)                                                | 1.905                                       |
| Fe1–X               | 2.4132(8)                                                              | 2.392                                       | 2.0366(13)                                                | 2.047                                       | 2.4177(4)                                                 | 2.432                                       |
| N1–X                | 3.283(2)                                                               | 3.157                                       | 2.974(2)                                                  | 2.877                                       | 3.2575(14)                                                | 3.292                                       |
| N5–X                | 3.256(3)                                                               | 3.378                                       | 2.824(2)                                                  | 2.797                                       | 3.2606(14)                                                | 3.292                                       |
| <b>Bond Angles</b>  |                                                                        |                                             |                                                           |                                             |                                                           |                                             |
| N2–Fe1–N3           | 78.46(8)                                                               | 75.69                                       | 78.71(6)                                                  | 77.71                                       | 75.20(4)                                                  | 74.96                                       |
| N2–Fe1–N4           | 100.68(8)                                                              | 101.9                                       | 100.08(6)                                                 | 102.63                                      | 110.89(4)                                                 | 106.21                                      |
| N3–Fe1–N4           | 76.15(8)                                                               | 77.92                                       | 76.81(6)                                                  | 76.25                                       | 75.98(4)                                                  | 76.91                                       |
| N2–Fe1–O1           | 133.83(8)                                                              | 140.97                                      | 111.73(6)                                                 | 108.88                                      | 109.77(5)                                                 | 102.91                                      |
| N3–Fe1–O1           | 80.98(8)                                                               | 80.53                                       | 81.99(6)                                                  | 80.49                                       | 79.65(4)                                                  | 80.71                                       |
| N4–Fe1–O1           | 113.35(8)                                                              | 102.81                                      | 137.16(6)                                                 | 135.49                                      | 124.46(5)                                                 | 136.41                                      |
| O1–Fe1–X            | 92.64(6)                                                               | 99.11                                       | 102.43(5)                                                 | 107.78                                      | 99.94(3)                                                  | 102.32                                      |
| X–Fe1–N2            | 105.06(6)                                                              | 97.82                                       | 106.41(6)                                                 | 102.01                                      | 107.10(3)                                                 | 102.25                                      |
| X–Fe1–N3            | 171.67(6)                                                              | 167.63                                      | 171.04(6)                                                 | 171.12                                      | 177.63(3)                                                 | 173.89                                      |
| X–Fe1–N4            | 109.16(6)                                                              | 114.02                                      | 94.89(6)                                                  | 95.25                                       | 102.48(3)                                                 | 99.41                                       |

|          |          |        |           |        |         |        |
|----------|----------|--------|-----------|--------|---------|--------|
| Fe1-X-C1 | 99.35(9) | 112.37 | 131.11(5) | 132.26 | 106.65  | 103.48 |
| N1-H1-X1 | 168(3)   | 167    | 171(2)    | 170    | 157(17) | 155    |
| N5-H5-X1 | 170(3)   | 162    | 167(2)    | 166    | 170(17) | 167    |

<sup>a</sup>For compound 1, the metrics are provided only for one of the two crystallographically independent molecules.

**Table S2.** Comparison of metrical parameters obtained from single crystal X-ray crystallography and DFT calculations for **3** and **4**.

| Bond lengths       | Complex <b>3</b> (X = S)                    |                                             | Complex <b>4</b> (X = O)                    |                                             |
|--------------------|---------------------------------------------|---------------------------------------------|---------------------------------------------|---------------------------------------------|
|                    | Bond lengths (Å) and bond angles (°) by XRD | Bond lengths (Å) and bond angles (°) by DFT | Bond lengths (Å) and bond angles (°) by XRD | Bond lengths (Å) and bond angles (°) by DFT |
| Fe1-N2             | 2.203(2)                                    | 2.282                                       | 2.216(3)                                    | 2.235                                       |
| Fe1-N3             | 2.217(2)                                    | 2.244                                       | 2.191(3)                                    | 2.243                                       |
| Fe1-N4             | 2.306(2)                                    | 2.297                                       | 2.192(3)                                    | 2.205                                       |
| Fe1-O1             | 1.8801(16)                                  | 1.879                                       | 1.902(2)                                    | 1.894                                       |
| Fe1-X              | 2.4483(8)                                   | 2.484                                       | 2.000(3)                                    | 2.001                                       |
| Fe1-O2             | 1.9034(18)                                  | 1.928                                       | 1.908(2)                                    | 1.912                                       |
| N1-O2              | 2.825(3)                                    | 2.824                                       | 2.792(14)                                   | 2.915                                       |
| N5-O2              | 2.697(3)                                    | 2.738                                       | 2.894(4)                                    | 2.916                                       |
| <b>Bond angles</b> |                                             |                                             |                                             |                                             |
| N2-Fe1-N3          | 74.80(8)                                    | 73.94                                       | 75.92(11)                                   | 76.53                                       |
| N2-Fe1-N4          | 92.18(7)                                    | 89.38                                       | 153.61(10)                                  | 154.38                                      |
| N3-Fe1-N4          | 76.84(8)                                    | 77.75                                       | 78.04(10)                                   | 78.23                                       |
| N2-Fe1-O1          | 154.15(8)                                   | 153.88                                      | 93.46(11)                                   | 90.52                                       |
| N3-Fe1-O1          | 81.34(7)                                    | 80.22                                       | 81.90(10)                                   | 80.51                                       |

|           |           |        |            |        |
|-----------|-----------|--------|------------|--------|
| N4-Fe1-O1 | 91.93(7)  | 88.78  | 87.09(10)  | 89.80  |
| O1-Fe1-X  | 86.93(6)  | 87.51  | 167.89(10) | 165.36 |
| X-Fe1-N4  | 174.04(6) | 172.70 | 87.92(11)  | 85.26  |
| X-Fe1-N2  | 86.35(6)  | 91.19  | 86.15(11)  | 88.26  |
| X-Fe1-N3  | 97.21(6)  | 95.41  | 86.27(10)  | 85.02  |
| O2-Fe1-N4 | 89.39(8)  | 91.44  | 104.55(11) | 103.72 |
| O2-Fe1-N2 | 99.18(8)  | 95.91  | 101.76(11) | 101.61 |
| O2-Fe1-N3 | 164.57(8) | 165.05 | 174.43(12) | 177.74 |
| O2-Fe1-X  | 96.55(6)  | 95.75  | 98.69(12)  | 96.23  |
| O2-Fe1-O1 | 106.37(8) | 110.18 | 93.25(11)  | 98.31  |
| Fe1-X-C1  | 107.99(7) | 113.6  | 138.74(12) | 139.93 |
| N1-H1-O2  | 163(3)    | 162    | 166(8)     | 160    |
| N5-H5-O2  | 158(3)    | 160    | 170(4)     | 161    |

**Table S3.** Comparison of metrical parameters obtained from single crystal X-ray crystallography and DFT calculations for **5•Li(OTf)(THF)** and DFT calculations for **5**.

| <b>Bond lengths</b> | <b>Complex 5</b>                            |                                             | <b>Complex 5•Li(OTf)(THF)</b>               |                                             |
|---------------------|---------------------------------------------|---------------------------------------------|---------------------------------------------|---------------------------------------------|
|                     | Bond lengths (Å) and bond angles (°) by XRD | Bond lengths (Å) and bond angles (°) by DFT | Bond lengths (Å) and bond angles (°) by XRD | Bond lengths (Å) and bond angles (°) by DFT |
| Fe1–N2              | -                                           | 2.299                                       | 2.1374(17)                                  | 2.167                                       |
| Fe1–N3              | -                                           | 2.307                                       | 2.1988(16)                                  | 2.239                                       |
| Fe1–N4              | -                                           | 2.233                                       | 2.1394(17)                                  | 2.171                                       |
| Fe1–O1              | -                                           | 1.877                                       | 1.9719(13)                                  | 1.985                                       |
| Fe1–O2              | -                                           | 1.917                                       | 1.9874(14)                                  | 1.972                                       |
| N1–O1               | -                                           | 2.691                                       | 2.825(2)                                    | 2.780                                       |
| N5–O1               | -                                           | 2.822                                       | 2.972(2)                                    | 2.994                                       |
| O1–O4               | -                                           |                                             | 2.954(2)                                    | 2.871                                       |
| Li1–O2              | -                                           | -                                           | 2.045(4)                                    | 2.178                                       |
| Li1–O1              | -                                           |                                             | 1.917(4)                                    | 1.897                                       |
| Li1–O3              | -                                           |                                             | 1.947(4)                                    | 1.926                                       |
| Li1–O6              | -                                           |                                             | 1.913(4)                                    | 1.971                                       |
| Li1–Fe1             | -                                           |                                             | 2.746(3)                                    | 2.765                                       |
| <b>Bond angles</b>  |                                             |                                             |                                             |                                             |
| N2–Fe1–N3           | -                                           | 73.97                                       | 78.99(6)                                    | 78.19                                       |
| N2–Fe1–N4           | -                                           | 89.08                                       | 107.65(6)                                   | 106.51                                      |
| N3–Fe1–N4           | -                                           | 78.29                                       | 77.17(6)                                    | 79.03                                       |
| N2–Fe1–O1           | -                                           | 87.26                                       | 103.85(6)                                   | 106.51                                      |
| N3–Fe1–O1           | -                                           | 80.13                                       | 173.95(6)                                   | 174.97                                      |
| N4–Fe1–O1           | -                                           | 154.04                                      | 106.70(6)                                   | 101.00                                      |

|           |   |        |            |        |
|-----------|---|--------|------------|--------|
| O2-Fe1-N4 | - | 85.37  | 138.22(6)  | 135.59 |
| O2-Fe1-N2 | - | 90.96  | 103.38(6)  | 107.32 |
| O2-Fe1-N3 | - | 165.48 | 82.13(6)   | 80.91  |
| O2-Fe1-O1 | - | 109.38 | 91.98(6)   | 94.33  |
| O2-Li1-O6 | - | -      | 112.89(18) | 115.68 |
| O2-Li1-O1 | - | -      | 91.83(15)  | 90.50  |
| O3-Li1-O1 | - | -      | 106.51(16) | 108.98 |
| O3-Li1-O6 | - | -      | 102.86(18) | 101.59 |
| O1-Li1-O6 | - | -      | 122.0(2)   | 119.25 |
| O2-Li1-O3 | - | -      | 121.9(2)   | 121.76 |
| N1-H1-O1  | - | 163    | 169        | 168    |
| N5-H5-O1  | - | 163    | 164        | 164    |
| O1-H2-O4  | - | -      | 161        | 163    |

**Table S4.** Experimental and calculated Mössbauer parameters for complexes **1** – **7**.

| complex <sup>a</sup> | calculated<br>isomer shift <sup>b,c</sup> | experimental<br>isomer shift <sup>b</sup> | calculated<br>quadrupole splitting <sup>b</sup> | experimental<br>quadrupole splitting <sup>b</sup> |
|----------------------|-------------------------------------------|-------------------------------------------|-------------------------------------------------|---------------------------------------------------|
| <b>1</b>             | 0.97                                      | 0.94                                      | 2.96                                            | 2.83                                              |
| <b>2</b>             | 1.04                                      | 1.03                                      | 2.85                                            | 2.77                                              |
| <b>3</b>             | 0.49                                      | 0.42                                      | 1.09                                            | 0.96                                              |
| <b>4</b>             | 0.51                                      | 0.47                                      | 1.12                                            | 1.01                                              |
| <b>5</b>             | 1.02                                      | 1.00                                      | 2.37                                            | 2.38                                              |
| <b>5•Li(OTf)</b>     | 0.99                                      | 1.01                                      | 2.73                                            | 2.56                                              |
| <b>6</b>             | 0.97                                      | 0.94                                      | 2.87                                            | 2.85                                              |
| <b>7</b>             | 0.50                                      | 0.47                                      | 1.02                                            | 0.84                                              |

<sup>a</sup> See DFT computational section for details regarding geometry optimizations.

<sup>b</sup> mm s<sup>-1</sup>.

<sup>c</sup> Electron density at the nucleus ( $\rho(0)$ ) calculated using the B3LYP functional with a combination of the CP(PPP) basis set for Fe and def2-TZVP basis set for all other atoms and calibrated as described in the DFT computational section.



**Table S5. Crystallographic data for complex 1**

| <b>1</b>                                                                                                                |                                                                                                                                                                                                                                                                                            |
|-------------------------------------------------------------------------------------------------------------------------|--------------------------------------------------------------------------------------------------------------------------------------------------------------------------------------------------------------------------------------------------------------------------------------------|
| Crystal data                                                                                                            |                                                                                                                                                                                                                                                                                            |
| Chemical formula                                                                                                        | C <sub>42</sub> H <sub>50</sub> FeN <sub>6</sub> O <sub>3</sub> S                                                                                                                                                                                                                          |
| <i>M<sub>r</sub></i>                                                                                                    | 774.79                                                                                                                                                                                                                                                                                     |
| Crystal system, space group                                                                                             | Triclinic, <i>P</i> -1                                                                                                                                                                                                                                                                     |
| Temperature (K)                                                                                                         | 110                                                                                                                                                                                                                                                                                        |
| <i>a</i> , <i>b</i> , <i>c</i> (Å)                                                                                      | 14.4495 (4), 15.0286 (5), 18.4897 (6)                                                                                                                                                                                                                                                      |
| $\alpha$ , $\beta$ , $\gamma$ (°)                                                                                       | 96.116 (3), 99.415 (3), 95.293 (3)                                                                                                                                                                                                                                                         |
| <i>V</i> (Å <sup>3</sup> )                                                                                              | 3913.8 (2)                                                                                                                                                                                                                                                                                 |
| <i>Z</i>                                                                                                                | 4                                                                                                                                                                                                                                                                                          |
| Radiation type                                                                                                          | Mo <i>K</i> $\alpha$                                                                                                                                                                                                                                                                       |
| $\mu$ (mm <sup>-1</sup> )                                                                                               | 0.49                                                                                                                                                                                                                                                                                       |
| Crystal size (mm)                                                                                                       | 0.09 × 0.07 × 0.04                                                                                                                                                                                                                                                                         |
| Data collection                                                                                                         |                                                                                                                                                                                                                                                                                            |
| Diffractometer                                                                                                          | SuperNova, Dual, Cu at zero, Atlas                                                                                                                                                                                                                                                         |
| Absorption correction                                                                                                   | Gaussian<br><i>CrysAlis PRO</i> 1.171.40.67a (Rigaku Oxford Diffraction, 2019) Numerical absorption correction based on gaussian integration over a multifaceted crystal model Empirical absorption correction using spherical harmonics, implemented in SCALE3 ABSPACK scaling algorithm. |
| <i>T<sub>min</sub></i> , <i>T<sub>max</sub></i>                                                                         | 0.902, 1.000                                                                                                                                                                                                                                                                               |
| No. of measured, independent and observed [ <i>I</i> > 2 $\sigma$ ( <i>I</i> )] reflections                             | 62752, 15389, 9849                                                                                                                                                                                                                                                                         |
| <i>R<sub>int</sub></i>                                                                                                  | 0.078                                                                                                                                                                                                                                                                                      |
| ( $\sin \theta/\lambda$ ) <sub>max</sub> (Å <sup>-1</sup> )                                                             | 0.617                                                                                                                                                                                                                                                                                      |
| Refinement                                                                                                              |                                                                                                                                                                                                                                                                                            |
| <i>R</i> [ <i>F</i> <sup>2</sup> > 2 $\sigma$ ( <i>F</i> <sup>2</sup> )], <i>wR</i> ( <i>F</i> <sup>2</sup> ), <i>S</i> | 0.052, 0.118, 1.03                                                                                                                                                                                                                                                                         |
| No. of reflections                                                                                                      | 15389                                                                                                                                                                                                                                                                                      |
| No. of parameters                                                                                                       | 979                                                                                                                                                                                                                                                                                        |
| No. of restraints                                                                                                       | 4                                                                                                                                                                                                                                                                                          |
| H-atom treatment                                                                                                        | H atoms treated by a mixture of independent and constrained refinement                                                                                                                                                                                                                     |
| $\Delta\rho_{\max}$ , $\Delta\rho_{\min}$ (e Å <sup>-3</sup> )                                                          | 0.57, -0.38                                                                                                                                                                                                                                                                                |

**Table S6. Crystallographic data for complex 2**

|                                                                                                                |                                                                                                                                                                                                                                                                                            |
|----------------------------------------------------------------------------------------------------------------|--------------------------------------------------------------------------------------------------------------------------------------------------------------------------------------------------------------------------------------------------------------------------------------------|
|                                                                                                                | <b>2</b>                                                                                                                                                                                                                                                                                   |
| Crystal data                                                                                                   |                                                                                                                                                                                                                                                                                            |
| Chemical formula                                                                                               | C <sub>42</sub> H <sub>50</sub> FeN <sub>6</sub> O <sub>4</sub>                                                                                                                                                                                                                            |
| <i>M<sub>r</sub></i>                                                                                           | 758.73                                                                                                                                                                                                                                                                                     |
| Crystal system, space group                                                                                    | Triclinic, <i>P</i> -1                                                                                                                                                                                                                                                                     |
| Temperature (K)                                                                                                | 110                                                                                                                                                                                                                                                                                        |
| <i>a</i> , <i>b</i> , <i>c</i> (Å)                                                                             | 10.0648(3), 12.0572(4), 17.8011(6)                                                                                                                                                                                                                                                         |
| $\alpha$ , $\beta$ , $\gamma$ (°)                                                                              | 74.850(3), 78.045(3), 72.471(3)                                                                                                                                                                                                                                                            |
| <i>V</i> (Å <sup>3</sup> )                                                                                     | 1968.87(12)                                                                                                                                                                                                                                                                                |
| <i>Z</i>                                                                                                       | 2                                                                                                                                                                                                                                                                                          |
| Radiation type                                                                                                 | Mo <i>K</i> $\alpha$                                                                                                                                                                                                                                                                       |
| $\mu$ (mm <sup>-1</sup> )                                                                                      | 0.43                                                                                                                                                                                                                                                                                       |
| Crystal size (mm)                                                                                              | 0.23 × 0.13 × 0.06                                                                                                                                                                                                                                                                         |
| Data collection                                                                                                |                                                                                                                                                                                                                                                                                            |
| Diffractometer                                                                                                 | SuperNova, Dual, Cu at zero, Atlas                                                                                                                                                                                                                                                         |
| Absorption correction                                                                                          | Gaussian<br><i>CrysAlis PRO</i> 1.171.39.29c (Rigaku Oxford Diffraction, 2017) Numerical absorption correction based on gaussian integration over a multifaceted crystal model Empirical absorption correction using spherical harmonics, implemented in SCALE3 ABSPACK scaling algorithm. |
| <i>T<sub>min</sub></i> , <i>T<sub>max</sub></i>                                                                | 0.719, 1.000                                                                                                                                                                                                                                                                               |
| No. of measured, independent and observed [ <i>I</i> > 2σ( <i>I</i> )] reflections                             | 30342, 9041, 7084                                                                                                                                                                                                                                                                          |
| <i>R<sub>int</sub></i>                                                                                         | 0.044                                                                                                                                                                                                                                                                                      |
| (sin $\theta/\lambda$ ) <sub>max</sub> (Å <sup>-1</sup> )                                                      | 0.617                                                                                                                                                                                                                                                                                      |
| Refinement                                                                                                     |                                                                                                                                                                                                                                                                                            |
| <i>R</i> [ <i>F</i> <sup>2</sup> > 2σ( <i>F</i> <sup>2</sup> )], <i>wR</i> ( <i>F</i> <sup>2</sup> ), <i>S</i> | 0.044, 0.094, 1.07                                                                                                                                                                                                                                                                         |
| No. of reflections                                                                                             | 9041                                                                                                                                                                                                                                                                                       |
| No. of parameters                                                                                              | 490                                                                                                                                                                                                                                                                                        |
| No. of restraints                                                                                              | 2                                                                                                                                                                                                                                                                                          |
| H-atom treatment                                                                                               | H atoms treated by a mixture of independent and constrained refinement                                                                                                                                                                                                                     |
| $\Delta\rho_{\max}$ , $\Delta\rho_{\min}$ (e Å <sup>-3</sup> )                                                 | 0.38, -0.38                                                                                                                                                                                                                                                                                |

**Table S7. Crystallographic data for complex 3**

| <b>3</b>                                                                                                       |                                                                                                                                                                                                                                                                                            |
|----------------------------------------------------------------------------------------------------------------|--------------------------------------------------------------------------------------------------------------------------------------------------------------------------------------------------------------------------------------------------------------------------------------------|
| Crystal data                                                                                                   |                                                                                                                                                                                                                                                                                            |
| Chemical formula                                                                                               | C <sub>42</sub> H <sub>51</sub> FeN <sub>6</sub> O <sub>4</sub> S                                                                                                                                                                                                                          |
| <i>M</i> <sub>r</sub>                                                                                          | 791.79                                                                                                                                                                                                                                                                                     |
| Crystal system, space group                                                                                    | Triclinic, <i>P</i> -1                                                                                                                                                                                                                                                                     |
| Temperature (K)                                                                                                | 110                                                                                                                                                                                                                                                                                        |
| <i>a</i> , <i>b</i> , <i>c</i> (Å)                                                                             | 8.0638 (2), 10.3249 (3), 23.4957 (7)                                                                                                                                                                                                                                                       |
| α, β, γ (°)                                                                                                    | 94.094 (2), 91.749 (2), 95.966 (2)                                                                                                                                                                                                                                                         |
| <i>V</i> (Å <sup>3</sup> )                                                                                     | 1939.22 (9)                                                                                                                                                                                                                                                                                |
| <i>Z</i>                                                                                                       | 2                                                                                                                                                                                                                                                                                          |
| Radiation type                                                                                                 | Mo <i>K</i> α                                                                                                                                                                                                                                                                              |
| μ (mm <sup>-1</sup> )                                                                                          | 0.49                                                                                                                                                                                                                                                                                       |
| Crystal size (mm)                                                                                              | 0.19 × 0.11 × 0.02                                                                                                                                                                                                                                                                         |
| Data collection                                                                                                |                                                                                                                                                                                                                                                                                            |
| Diffractometer                                                                                                 | SuperNova, Dual, Cu at zero, Atlas                                                                                                                                                                                                                                                         |
| Absorption correction                                                                                          | Gaussian<br><i>CrysAlis PRO</i> 1.171.39.29c (Rigaku Oxford Diffraction, 2017) Numerical absorption correction based on gaussian integration over a multifaceted crystal model Empirical absorption correction using spherical harmonics, implemented in SCALE3 ABSPACK scaling algorithm. |
| <i>T</i> <sub>min</sub> , <i>T</i> <sub>max</sub>                                                              | 0.781, 1.000                                                                                                                                                                                                                                                                               |
| No. of measured, independent and observed [ <i>I</i> > 2σ( <i>I</i> )] reflections                             | 32444, 7609, 5921                                                                                                                                                                                                                                                                          |
| <i>R</i> <sub>int</sub>                                                                                        | 0.051                                                                                                                                                                                                                                                                                      |
| (sin θ/λ) <sub>max</sub> (Å <sup>-1</sup> )                                                                    | 0.617                                                                                                                                                                                                                                                                                      |
| Refinement                                                                                                     |                                                                                                                                                                                                                                                                                            |
| <i>R</i> [ <i>F</i> <sup>2</sup> > 2σ( <i>F</i> <sup>2</sup> )], <i>wR</i> ( <i>F</i> <sup>2</sup> ), <i>S</i> | 0.046, 0.111, 1.06                                                                                                                                                                                                                                                                         |
| No. of reflections                                                                                             | 7609                                                                                                                                                                                                                                                                                       |
| No. of parameters                                                                                              | 502                                                                                                                                                                                                                                                                                        |
| No. of restraints                                                                                              | 3                                                                                                                                                                                                                                                                                          |
| H-atom treatment                                                                                               | H atoms treated by a mixture of independent and constrained refinement                                                                                                                                                                                                                     |
| Δρ <sub>max</sub> , Δρ <sub>min</sub> (e Å <sup>-3</sup> )                                                     | 0.43, -0.34                                                                                                                                                                                                                                                                                |

**Table S8. Crystallographic data for complex 4**

| 4                                                                                                              |                                                                                                                                                                                                                                                                                                                                                                                                              |
|----------------------------------------------------------------------------------------------------------------|--------------------------------------------------------------------------------------------------------------------------------------------------------------------------------------------------------------------------------------------------------------------------------------------------------------------------------------------------------------------------------------------------------------|
| Crystal data                                                                                                   |                                                                                                                                                                                                                                                                                                                                                                                                              |
| Chemical formula                                                                                               | C <sub>42</sub> H <sub>51</sub> FeN <sub>6</sub> O <sub>5</sub> ·0.662(C <sub>4</sub> H <sub>8</sub> O)·0.338(C <sub>5</sub> H <sub>12</sub> )                                                                                                                                                                                                                                                               |
| <i>M<sub>r</sub></i>                                                                                           | 847.85                                                                                                                                                                                                                                                                                                                                                                                                       |
| Crystal system, space group                                                                                    | Tetragonal, <i>I</i> 4 <sub>1</sub> / <i>a</i>                                                                                                                                                                                                                                                                                                                                                               |
| Temperature (K)                                                                                                | 100                                                                                                                                                                                                                                                                                                                                                                                                          |
| <i>a</i> , <i>c</i> (Å)                                                                                        | 26.4035 (6), 26.2155 (5)                                                                                                                                                                                                                                                                                                                                                                                     |
| <i>V</i> (Å <sup>3</sup> )                                                                                     | 18276.0 (9)                                                                                                                                                                                                                                                                                                                                                                                                  |
| <i>Z</i>                                                                                                       | 16                                                                                                                                                                                                                                                                                                                                                                                                           |
| Radiation type                                                                                                 | Cu <i>K</i> α                                                                                                                                                                                                                                                                                                                                                                                                |
| μ (mm <sup>-1</sup> )                                                                                          | 3.06                                                                                                                                                                                                                                                                                                                                                                                                         |
| Crystal size (mm)                                                                                              | 0.10 × 0.07 × 0.05                                                                                                                                                                                                                                                                                                                                                                                           |
| Data collection                                                                                                |                                                                                                                                                                                                                                                                                                                                                                                                              |
| Diffractometer                                                                                                 | ROD, Synergy Custom system, HyPix                                                                                                                                                                                                                                                                                                                                                                            |
| Absorption correction                                                                                          | Analytical<br><i>CrysAlis PRO</i> 1.171.40.67a (Rigaku Oxford Diffraction, 2019) Analytical numeric absorption correction using a multifaceted crystal model based on expressions derived by R.C. Clark & J.S. Reid. (Clark, R. C. & Reid, J. S. (1995). <i>Acta Cryst.</i> A51, 887-897) Empirical absorption correction using spherical harmonics, implemented in <i>SCALE3 ABSPACK</i> scaling algorithm. |
| <i>T<sub>min</sub></i> , <i>T<sub>max</sub></i>                                                                | 0.803, 0.888                                                                                                                                                                                                                                                                                                                                                                                                 |
| No. of measured, independent and observed [ <i>I</i> > 2σ( <i>I</i> )] reflections                             | 28851, 8175, 5553                                                                                                                                                                                                                                                                                                                                                                                            |
| <i>R<sub>int</sub></i>                                                                                         | 0.055                                                                                                                                                                                                                                                                                                                                                                                                        |
| (sin θ/λ) <sub>max</sub> (Å <sup>-1</sup> )                                                                    | 0.598                                                                                                                                                                                                                                                                                                                                                                                                        |
| Refinement                                                                                                     |                                                                                                                                                                                                                                                                                                                                                                                                              |
| <i>R</i> [ <i>F</i> <sup>2</sup> > 2σ( <i>F</i> <sup>2</sup> )], <i>wR</i> ( <i>F</i> <sup>2</sup> ), <i>S</i> | 0.066, 0.208, 1.04                                                                                                                                                                                                                                                                                                                                                                                           |
| No. of reflections                                                                                             | 8175                                                                                                                                                                                                                                                                                                                                                                                                         |
| No. of parameters                                                                                              | 649                                                                                                                                                                                                                                                                                                                                                                                                          |
| No. of restraints                                                                                              | 333                                                                                                                                                                                                                                                                                                                                                                                                          |
| H-atom treatment                                                                                               | H atoms treated by a mixture of independent and constrained refinement                                                                                                                                                                                                                                                                                                                                       |
| Δρ <sub>max</sub> , Δρ <sub>min</sub> (e Å <sup>-3</sup> )                                                     | 0.46, -0.44                                                                                                                                                                                                                                                                                                                                                                                                  |

**Table S9. Crystallographic data for complex 5.Li(OTf)(THF)**

| 5.Li(OTf)(THF)                                                                                                 |                                                                                                                                                                                                                                                                                                                                                                                                       |
|----------------------------------------------------------------------------------------------------------------|-------------------------------------------------------------------------------------------------------------------------------------------------------------------------------------------------------------------------------------------------------------------------------------------------------------------------------------------------------------------------------------------------------|
| Crystal data                                                                                                   |                                                                                                                                                                                                                                                                                                                                                                                                       |
| Chemical formula                                                                                               | C <sub>41</sub> H <sub>55</sub> F <sub>3</sub> FeLiN <sub>5</sub> O <sub>6</sub> S                                                                                                                                                                                                                                                                                                                    |
| <i>M<sub>r</sub></i>                                                                                           | 865.75                                                                                                                                                                                                                                                                                                                                                                                                |
| Crystal system, space group                                                                                    | Monoclinic, <i>P2<sub>1</sub>/c</i>                                                                                                                                                                                                                                                                                                                                                                   |
| Temperature (K)                                                                                                | 110                                                                                                                                                                                                                                                                                                                                                                                                   |
| <i>a</i> , <i>b</i> , <i>c</i> (Å)                                                                             | 9.43191 (14), 20.1665 (2), 23.0988 (3)                                                                                                                                                                                                                                                                                                                                                                |
| β (°)                                                                                                          | 101.3337 (14)                                                                                                                                                                                                                                                                                                                                                                                         |
| <i>V</i> (Å <sup>3</sup> )                                                                                     | 4307.91 (10)                                                                                                                                                                                                                                                                                                                                                                                          |
| <i>Z</i>                                                                                                       | 4                                                                                                                                                                                                                                                                                                                                                                                                     |
| Radiation type                                                                                                 | Cu <i>K</i> α                                                                                                                                                                                                                                                                                                                                                                                         |
| μ (mm <sup>-1</sup> )                                                                                          | 3.80                                                                                                                                                                                                                                                                                                                                                                                                  |
| Crystal size (mm)                                                                                              | 0.26 × 0.11 × 0.04                                                                                                                                                                                                                                                                                                                                                                                    |
| Data collection                                                                                                |                                                                                                                                                                                                                                                                                                                                                                                                       |
| Diffractometer                                                                                                 | SuperNova, Dual, Cu at zero, Atlas                                                                                                                                                                                                                                                                                                                                                                    |
| Absorption correction                                                                                          | Analytical<br><i>CrysAlis PRO</i> 1.171.39.29c (Rigaku Oxford Diffraction, 2017) Analytical numeric absorption correction using a multifaceted crystal model based on expressions derived by R.C. Clark & J.S. Reid. (Clark, R. C. & Reid, J. S. (1995). <i>Acta Cryst.</i> A51, 887-897) Empirical absorption correction using spherical harmonics, implemented in SCALE3 ABSPACK scaling algorithm. |
| <i>T<sub>min</sub></i> , <i>T<sub>max</sub></i>                                                                | 0.515, 0.886                                                                                                                                                                                                                                                                                                                                                                                          |
| No. of measured, independent and observed [ <i>I</i> > 2σ( <i>I</i> )] reflections                             | 28442, 8460, 7282                                                                                                                                                                                                                                                                                                                                                                                     |
| <i>R<sub>int</sub></i>                                                                                         | 0.042                                                                                                                                                                                                                                                                                                                                                                                                 |
| (sin θ/λ) <sub>max</sub> (Å <sup>-1</sup> )                                                                    | 0.616                                                                                                                                                                                                                                                                                                                                                                                                 |
| Refinement                                                                                                     |                                                                                                                                                                                                                                                                                                                                                                                                       |
| <i>R</i> [ <i>F</i> <sup>2</sup> > 2σ( <i>F</i> <sup>2</sup> )], <i>wR</i> ( <i>F</i> <sup>2</sup> ), <i>S</i> | 0.041, 0.109, 1.04                                                                                                                                                                                                                                                                                                                                                                                    |
| No. of reflections                                                                                             | 8460                                                                                                                                                                                                                                                                                                                                                                                                  |
| No. of parameters                                                                                              | 538                                                                                                                                                                                                                                                                                                                                                                                                   |
| No. of restraints                                                                                              | 3                                                                                                                                                                                                                                                                                                                                                                                                     |
| H-atom treatment                                                                                               | H atoms treated by a mixture of independent and constrained refinement                                                                                                                                                                                                                                                                                                                                |
| Δρ <sub>max</sub> , Δρ <sub>min</sub> (e Å <sup>-3</sup> )                                                     | 0.47, -0.44                                                                                                                                                                                                                                                                                                                                                                                           |

**Table S10. Crystallographic data for complex 6**

|                                                                            |                                                                                                                                                                                                                                                                                            |
|----------------------------------------------------------------------------|--------------------------------------------------------------------------------------------------------------------------------------------------------------------------------------------------------------------------------------------------------------------------------------------|
|                                                                            | xs2404a                                                                                                                                                                                                                                                                                    |
| Crystal data                                                               |                                                                                                                                                                                                                                                                                            |
| Chemical formula                                                           | C <sub>43</sub> H <sub>50</sub> F <sub>3</sub> FeN <sub>5</sub> OS                                                                                                                                                                                                                         |
| $M_r$                                                                      | 797.79                                                                                                                                                                                                                                                                                     |
| Crystal system, space group                                                | Triclinic, <i>P</i> -1                                                                                                                                                                                                                                                                     |
| Temperature (K)                                                            | 110                                                                                                                                                                                                                                                                                        |
| $a, b, c$ (Å)                                                              | 10.4559 (2), 12.4259 (3), 17.1156 (4)                                                                                                                                                                                                                                                      |
| $\alpha, \beta, \gamma$ (°)                                                | 105.392 (2), 106.906 (2), 97.368 (2)                                                                                                                                                                                                                                                       |
| $V$ (Å <sup>3</sup> )                                                      | 1999.80 (8)                                                                                                                                                                                                                                                                                |
| $Z$                                                                        | 2                                                                                                                                                                                                                                                                                          |
| Radiation type                                                             | Mo $K\alpha$                                                                                                                                                                                                                                                                               |
| $\mu$ (mm <sup>-1</sup> )                                                  | 0.48                                                                                                                                                                                                                                                                                       |
| Crystal size (mm)                                                          | 0.42 × 0.19 × 0.11                                                                                                                                                                                                                                                                         |
| Data collection                                                            |                                                                                                                                                                                                                                                                                            |
| Diffractometer                                                             | SuperNova, Dual, Cu at zero, Atlas                                                                                                                                                                                                                                                         |
| Absorption correction                                                      | Gaussian<br><i>CrysAlis PRO</i> 1.171.40.67a (Rigaku Oxford Diffraction, 2019) Numerical absorption correction based on gaussian integration over a multifaceted crystal model Empirical absorption correction using spherical harmonics, implemented in SCALE3 ABSPACK scaling algorithm. |
| $T_{\min}, T_{\max}$                                                       | 0.508, 1.000                                                                                                                                                                                                                                                                               |
| No. of measured, independent and observed [ $I > 2\sigma(I)$ ] reflections | 37248, 9197, 7968                                                                                                                                                                                                                                                                          |
| $R_{\text{int}}$                                                           | 0.030                                                                                                                                                                                                                                                                                      |
| $(\sin \theta/\lambda)_{\text{max}}$ (Å <sup>-1</sup> )                    | 0.650                                                                                                                                                                                                                                                                                      |
| Refinement                                                                 |                                                                                                                                                                                                                                                                                            |
| $R[F^2 > 2\sigma(F^2)], wR(F^2), S$                                        | 0.033, 0.080, 1.04                                                                                                                                                                                                                                                                         |
| No. of reflections                                                         | 9197                                                                                                                                                                                                                                                                                       |
| No. of parameters                                                          | 499                                                                                                                                                                                                                                                                                        |
| No. of restraints                                                          | 2                                                                                                                                                                                                                                                                                          |
| H-atom treatment                                                           | H atoms treated by a mixture of independent and constrained refinement                                                                                                                                                                                                                     |
| $\Delta\rho_{\text{max}}, \Delta\rho_{\text{min}}$ (e Å <sup>-3</sup> )    | 0.38, -0.33                                                                                                                                                                                                                                                                                |

**Table S11. DFT optimized coordinates of 1**

|    |                   |                   |                   |
|----|-------------------|-------------------|-------------------|
| Fe | 12.33790618182070 | 6.38266383283165  | 3.82732202147131  |
| C  | 12.54424142480259 | 10.18061090014702 | 7.57506417379287  |
| H  | 12.46080590430373 | 10.91092869398480 | 6.76017290018233  |
| H  | 12.03571132336503 | 10.59693344969766 | 8.45307496704546  |
| H  | 11.99998275154390 | 9.27942971180061  | 7.27121171644261  |
| C  | 14.73736961796618 | 11.15803372587808 | 8.33326279536766  |
| H  | 14.69269557571101 | 11.92307987160862 | 7.54724046890684  |
| H  | 15.79468688359826 | 10.97191264595823 | 8.56322187129992  |
| H  | 14.27110266548185 | 11.57833179886745 | 9.23188687786936  |
| C  | 14.09007050672178 | 8.82644329781645  | 9.03130636577498  |
| H  | 13.57627503336719 | 9.19610038794353  | 9.92682860893855  |
| H  | 15.12857030011325 | 8.61096536593747  | 9.31481750066995  |
| H  | 13.61371228408180 | 7.88333765841702  | 8.73984064203203  |
| C  | 14.01689237219060 | 9.86645737201705  | 7.89936287076058  |
| C  | 14.73573272742351 | 9.34577746396987  | 6.62438772787600  |
| H  | 14.70032438491912 | 10.13380817957143 | 5.86037467898957  |
| H  | 15.79465690475749 | 9.16724393963312  | 6.84057213221324  |
| C  | 14.66045940645927 | 6.89639275953522  | 6.02623418760338  |
| C  | 15.74161666876630 | 6.50369190896347  | 6.85884999038330  |
| H  | 16.21230002754575 | 7.22331509213968  | 7.51598518968756  |
| C  | 16.15304537130288 | 5.18697848414364  | 6.84869281215194  |
| H  | 16.97213544439990 | 4.87312128949555  | 7.49107766102811  |
| C  | 15.49712244905941 | 4.25366909051051  | 6.03456776508571  |
| H  | 15.77906026832775 | 3.20586340625538  | 6.03166205756379  |
| C  | 14.46519399162554 | 4.70776179328644  | 5.22685235904153  |
| C  | 13.75658712126009 | 3.74863035206303  | 4.28719492654530  |
| H  | 14.28513317124328 | 3.74558177857232  | 3.32681166229513  |
| H  | 13.81741468440177 | 2.72378350394101  | 4.68614434042413  |
| C  | 11.85659463949433 | 3.68585270492381  | 2.74677576837967  |
| H  | 10.80126173246902 | 3.96821666870589  | 2.68400098951985  |
| H  | 11.89946758108763 | 2.58774258351716  | 2.65666748587914  |
| C  | 12.61598651459286 | 4.31997200181402  | 1.59880842675864  |
| C  | 12.88721876430742 | 3.57419778714435  | 0.46028927902907  |
| H  | 12.56984902674981 | 2.53904985804727  | 0.39744142493357  |
| C  | 13.57014088446768 | 4.19732390347852  | -0.59011386025546 |
| H  | 13.78482967899022 | 3.65432466437819  | -1.50707924456686 |
| C  | 13.97313194318464 | 5.50953862388358  | -0.45658036964022 |
| H  | 14.48647447181577 | 6.01012790642274  | -1.26710004019409 |
| C  | 13.68617899404361 | 6.21189111943995  | 0.74586435016755  |
| C  | 14.93848752540246 | 8.18273976629204  | -0.05973398134608 |
| H  | 14.36368207009564 | 8.37619123368821  | -0.98115515357222 |
| H  | 15.76445578796608 | 7.51300339523066  | -0.33316048074752 |
| C  | 15.54805000952400 | 9.51896882351127  | 0.42988317361550  |
| C  | 16.53595706010234 | 9.97755221788145  | -0.66299013121821 |
| H  | 16.97470565856427 | 10.94649379322674 | -0.39836518222666 |
| H  | 16.03559472211630 | 10.09406015643441 | -1.63266964712336 |
| H  | 17.35760914551887 | 9.26121033568250  | -0.78993945305802 |
| C  | 14.45801271437402 | 10.59581529002617 | 0.60049882209785  |

|   |                   |                   |                   |
|---|-------------------|-------------------|-------------------|
| H | 13.74417584449959 | 10.33290203018379 | 1.38689573364860  |
| H | 13.90498945662026 | 10.74717208467153 | -0.33611021678451 |
| H | 14.91292323225196 | 11.55519448364038 | 0.87528106706884  |
| C | 16.30930733439229 | 9.32030753058216  | 1.75453265001018  |
| H | 16.81255195479289 | 10.25018523318419 | 2.04583813469861  |
| H | 17.07433956562626 | 8.53903968537909  | 1.66039128718602  |
| H | 15.63561960176537 | 9.03874140481905  | 2.57038468152694  |
| C | 11.48803812513574 | 3.87692792186657  | 5.19793040352586  |
| H | 12.09821118796205 | 4.03951218096754  | 6.08928064619580  |
| H | 11.17261780252408 | 2.82399028178024  | 5.20624091685766  |
| C | 10.28990975323502 | 4.89270518480287  | 5.27996787268092  |
| C | 9.85245191522253  | 4.93715634792133  | 6.77397420274068  |
| C | 10.45331633239699 | 5.89536916685155  | 7.60421245656762  |
| H | 11.15607691949603 | 6.59078660316374  | 7.15764114964914  |
| C | 10.14315653715458 | 5.96756056100464  | 8.96232101416568  |
| H | 10.61697952096626 | 6.72522051020116  | 9.58286776286934  |
| C | 9.22113553631595  | 5.07978337120315  | 9.52244185088702  |
| H | 8.96979643984367  | 5.14019934422915  | 10.57867735462758 |
| C | 8.61707737012057  | 4.12245122894953  | 8.70761164210028  |
| H | 7.88902442106288  | 3.43076465671919  | 9.12598544586834  |
| C | 8.93007357016891  | 4.05180591465803  | 7.34671217379109  |
| H | 8.42633777924279  | 3.31361444185926  | 6.73176438366790  |
| C | 9.09756371747788  | 4.46978803362892  | 4.38208864404927  |
| C | 8.66602935186919  | 3.13931493880157  | 4.23921122690807  |
| H | 9.18278585299847  | 2.33314143718467  | 4.75390809832159  |
| C | 7.56956103708299  | 2.81607849663864  | 3.43503052162460  |
| H | 7.25879318394142  | 1.77770462973142  | 3.34357949960447  |
| C | 6.87746131684014  | 3.81809990695800  | 2.75373438909374  |
| H | 6.02251263379759  | 3.56847191751313  | 2.13029411589691  |
| C | 7.29665699755516  | 5.14378285285746  | 2.88318770951745  |
| H | 6.76852261990344  | 5.93662117995115  | 2.35944617556254  |
| C | 8.39375752817968  | 5.46273403054567  | 3.68579011093984  |
| H | 8.72559488915590  | 6.49001643226474  | 3.77701289198512  |
| C | 10.70599503614438 | 9.45306142056470  | 3.21036557848044  |
| C | 10.45550881318435 | 10.45332834943609 | 2.24864185073635  |
| H | 11.26086133969373 | 10.77894628340769 | 1.59805808501453  |
| C | 9.19762739296810  | 11.02911605834786 | 2.12549999781423  |
| H | 8.99672129345509  | 11.79770562663907 | 1.38813311761663  |
| C | 8.17190165470935  | 10.60431491641268 | 2.97366084000316  |
| C | 8.39087999649543  | 9.61817641290942  | 3.93905962150551  |
| H | 7.57503380687161  | 9.31144992726902  | 4.58336819107381  |
| C | 9.65349244376112  | 9.04716704500430  | 4.05666852586867  |
| H | 9.83359541080128  | 8.26929656056971  | 4.79248873578153  |
| N | 14.15752155333872 | 8.15399357281880  | 6.01916730260503  |
| H | 13.39605584484659 | 8.32003761829310  | 5.35911317088813  |
| N | 14.06237712778497 | 5.99734997798396  | 5.19272329955909  |
| N | 12.36715280591845 | 4.15505220951320  | 4.03816928275941  |
| N | 12.99603534193106 | 5.61067390263444  | 1.75882467814021  |
| N | 14.11655689164480 | 7.48827114348078  | 0.92638634471687  |
| H | 13.61383209091375 | 8.04371620628937  | 1.62326548068570  |
| N | 6.84311832332919  | 11.20344314891928 | 2.84403967918507  |



|   |                   |                   |                  |
|---|-------------------|-------------------|------------------|
| O | 10.77955739093136 | 6.13571343217109  | 4.90641222228157 |
| S | 12.34541193311999 | 8.79151052087802  | 3.37739896617252 |
| O | 6.68190596830206  | 12.06632652118476 | 1.98405637086009 |
| O | 5.95814383882507  | 10.81157453184153 | 3.60030921332151 |

**Table S12. DFT optimized coordinates of 2**

|    |                   |                   |                   |
|----|-------------------|-------------------|-------------------|
| Fe | 12.14141067603579 | 6.30296878943165  | 3.94506080373282  |
| C  | 12.20850669808750 | 10.50849360701088 | 6.88718577721098  |
| H  | 12.14450701502541 | 11.13377222280951 | 5.98783981145402  |
| H  | 11.63366895525151 | 11.00353200565226 | 7.67917099982724  |
| H  | 11.71466766329444 | 9.55643402985189  | 6.66667607307477  |
| C  | 14.30757363974636 | 11.65807582166116 | 7.67037144706779  |
| H  | 14.28483656241908 | 12.33622593699128 | 6.80771332815642  |
| H  | 15.35433262097292 | 11.54504533006214 | 7.98238924422336  |
| H  | 13.76734111795259 | 12.14572686836140 | 8.49000062491106  |
| C  | 13.70509210573748 | 9.38348200506064  | 8.56816373730493  |
| H  | 13.11279021588106 | 9.81708494989521  | 9.38297549453929  |
| H  | 14.72925792276099 | 9.25126701152472  | 8.94036323801504  |
| H  | 13.29053036011269 | 8.39362862373414  | 8.34738581577604  |
| C  | 13.66804978352863 | 10.29755331860650 | 7.33011310604732  |
| C  | 14.49439499155627 | 9.68259455742512  | 6.16577900094486  |
| H  | 14.49592896564930 | 10.39434313028341 | 5.32973778046815  |
| H  | 15.53967093772957 | 9.57233711800163  | 6.47492994267933  |
| C  | 14.50987991274666 | 7.18032861065984  | 5.87469211866441  |
| C  | 15.55859094874927 | 6.93091098483196  | 6.80049176392437  |
| H  | 15.98885826516038 | 7.74324717288834  | 7.37058776182471  |
| C  | 16.00011167187564 | 5.63636917937833  | 6.98152865647564  |
| H  | 16.79516809282114 | 5.43400517681493  | 7.69507661769505  |
| C  | 15.41794592881831 | 4.58538571922057  | 6.25833438253269  |
| H  | 15.74214712524588 | 3.55849237775136  | 6.38960990309872  |
| C  | 14.40808092514156 | 4.89788905340024  | 5.36103667625706  |
| C  | 13.80398885464699 | 3.82050525466229  | 4.47698104565314  |
| H  | 14.35806456613841 | 3.81149496959792  | 3.53069192885958  |
| H  | 13.94838178726451 | 2.83105932887799  | 4.93816449486267  |
| C  | 11.99715782277981 | 3.55674686200941  | 2.85088980413458  |
| H  | 10.91393474280454 | 3.68098957285481  | 2.75854774759080  |
| H  | 12.20693616322261 | 2.47881273892917  | 2.74954484539960  |
| C  | 12.68326354747218 | 4.31801679710463  | 1.73168204354638  |
| C  | 13.07832991659532 | 3.66387719525634  | 0.57508213565658  |
| H  | 12.92448795094037 | 2.59521339610752  | 0.46810494689509  |
| C  | 13.67783382797621 | 4.42524944261465  | -0.43852261936607 |
| H  | 14.00160013754966 | 3.95084073520354  | -1.36144283519586 |
| C  | 13.87410809086408 | 5.77850848984138  | -0.26060209646409 |
| H  | 14.35632315444117 | 6.36751937841574  | -1.02968420038497 |
| C  | 13.44845205695394 | 6.39029296054324  | 0.94996426728055  |
| C  | 14.11414677929991 | 8.72471015050903  | 0.29520342744663  |
| H  | 13.44487029547973 | 9.59127766389813  | 0.37600930531466  |
| H  | 14.03165545600348 | 8.37292877210779  | -0.73913808489844 |
| C  | 15.56865223007388 | 9.20016951170239  | 0.56868022160231  |
| C  | 15.88984391002376 | 10.31255697384165 | -0.44735123733761 |

|   |                   |                   |                   |
|---|-------------------|-------------------|-------------------|
| H | 16.91123418414479 | 10.68539786790635 | -0.30496867937856 |
| H | 15.20668677863280 | 11.16475015232467 | -0.33897805304226 |
| H | 15.81073204928462 | 9.94786734590012  | -1.47983926509188 |
| C | 15.67290140797053 | 9.76239612061039  | 1.99919685503448  |
| H | 15.43373118934695 | 8.99804160078322  | 2.74747847295386  |
| H | 14.98478920695255 | 10.60529319724229 | 2.14372298047906  |
| H | 16.68915721694217 | 10.12297468211600 | 2.19910220314386  |
| C | 16.56372228609628 | 8.03890310777100  | 0.39623566699630  |
| H | 17.58664482862572 | 8.37439167536195  | 0.60721508655702  |
| H | 16.55070527965840 | 7.64755261003928  | -0.62920198885215 |
| H | 16.33647882629420 | 7.21248923164126  | 1.07910769419946  |
| C | 11.49058448373396 | 3.71451637130707  | 5.28530646974594  |
| H | 12.04894342443770 | 3.91532942003185  | 6.20341190793091  |
| H | 11.25998580049870 | 2.63956749160992  | 5.27282284984154  |
| C | 10.21430261500015 | 4.63193040165255  | 5.33563635036562  |
| C | 9.67336411574799  | 4.56295582912063  | 6.79109968585064  |
| C | 9.73809090877296  | 5.71014594777877  | 7.59100991973683  |
| H | 10.13683678564057 | 6.61607273889598  | 7.14953936365457  |
| C | 9.29652333987617  | 5.68623812778898  | 8.91584757447133  |
| H | 9.34921724894279  | 6.59211495099355  | 9.51597275302638  |
| C | 8.78867608305895  | 4.50965875123663  | 9.46960354883729  |
| H | 8.44272861691844  | 4.49010546847236  | 10.49991838059385 |
| C | 8.72264914061979  | 3.35832309645132  | 8.68208030972856  |
| H | 8.32410925421851  | 2.43519947362041  | 9.09663082845598  |
| C | 9.15787967093381  | 3.38675459428558  | 7.35550543169308  |
| H | 9.07327538022992  | 2.48314237656985  | 6.75919474221148  |
| C | 9.09486723894004  | 4.16797767468864  | 4.36202663231226  |
| C | 8.77570779704755  | 2.82059986665233  | 4.12227121039705  |
| H | 9.34553184614421  | 2.02596120076820  | 4.59667772826413  |
| C | 7.73428016853573  | 2.46460905103757  | 3.26113681912966  |
| H | 7.51272739699466  | 1.41300708391981  | 3.09312191688599  |
| C | 6.98477111457433  | 3.45067580497005  | 2.61874605342233  |
| H | 6.17305852000342  | 3.17517652334531  | 1.94980836597387  |
| C | 7.29205677155330  | 4.79412573683255  | 2.84432738331843  |
| H | 6.71853622010591  | 5.57458522257750  | 2.35037369419610  |
| C | 8.33489904575615  | 5.14562880505040  | 3.70335914175471  |
| H | 8.57892979787365  | 6.18825025675734  | 3.87151176395032  |
| C | 11.10875633335979 | 9.18009175229034  | 3.44052185422138  |
| C | 11.27777756392743 | 10.40379737395604 | 2.74325867219401  |
| H | 12.22742225305056 | 10.59693938318891 | 2.25129324442482  |
| C | 10.26255191220261 | 11.34581571164124 | 2.68991498026418  |
| H | 10.38616194568509 | 12.28102718005589 | 2.15637093160898  |
| C | 9.05188181367338  | 11.08603440710476 | 3.34161767204376  |
| C | 8.85771718530966  | 9.89306059728341  | 4.04865062064970  |
| H | 7.91161113366816  | 9.72436417527341  | 4.55009986435925  |
| C | 9.87410032036159  | 8.95154296851324  | 4.10117393803361  |
| H | 9.74759100234865  | 8.02329340905601  | 4.65176647032543  |
| N | 14.00840838196789 | 8.41658094327070  | 5.63516507119057  |
| H | 13.28414075202633 | 8.47041636570826  | 4.91221487099321  |
| N | 13.95393878552519 | 6.15558350694373  | 5.16886734789358  |
| N | 12.39092163874069 | 4.07606133306123  | 4.16559120571348  |

|   |                   |                   |                  |
|---|-------------------|-------------------|------------------|
| N | 12.85741836458953 | 5.64585270076178  | 1.92897499984311 |
| N | 13.60616525299619 | 7.71128695535623  | 1.20693940291225 |
| H | 13.14301480494108 | 8.05256590420456  | 2.06025349798283 |
| N | 7.98391241492578  | 12.07304484983258 | 3.28565596828245 |
| O | 10.62154761529017 | 5.92182663545046  | 5.04164287392845 |
| O | 12.09740513073167 | 8.29729795581699  | 3.48744238610877 |
| O | 8.19020402638604  | 13.11544516541023 | 2.66393647304914 |
| O | 6.92771093535052  | 11.81791707232003 | 3.86193660872653 |

**Table S13. DFT optimized coordinates of 3**

|    |                   |                   |                   |
|----|-------------------|-------------------|-------------------|
| Fe | -0.04329022167836 | 0.78653307745753  | 5.52084113223545  |
| S  | -0.45865666114099 | -1.58860108155133 | 6.11678247769836  |
| C  | 0.39637033998581  | 4.50907404587386  | 9.48677096047897  |
| H  | 0.01225013305025  | 4.21859728052554  | 8.50415971283413  |
| H  | 1.27964162036089  | 5.14156000721260  | 9.32999588530442  |
| H  | -0.36841803171721 | 5.12055033518544  | 9.98188279832878  |
| C  | 1.28536933000079  | 3.76967809410855  | 11.71696233556025 |
| H  | 2.18099097534655  | 4.39138923722750  | 11.59196630888977 |
| H  | 1.54577736688894  | 2.92717570692979  | 12.36973401935499 |
| H  | 0.53043919246111  | 4.37284243701973  | 12.23529896032166 |
| C  | -0.50961401186604 | 2.42099226960572  | 10.59704818783706 |
| H  | -1.27334795516202 | 2.99961971247014  | 11.13092206364105 |
| H  | -0.27225933065694 | 1.54143691290142  | 11.20924912122271 |
| H  | -0.95536428941608 | 2.07501970717204  | 9.65910564000123  |
| C  | 0.74391697810725  | 3.28494947393989  | 10.35541638699072 |
| C  | 1.86970377712466  | 2.45671712349467  | 9.69753556232773  |
| H  | 2.75767635482561  | 3.09975426857726  | 9.61339233587340  |
| H  | 2.13923106379114  | 1.62886818255103  | 10.37396501955468 |
| C  | 2.44299630747821  | 1.23168202854611  | 7.64388336868597  |
| C  | 3.78303287486669  | 1.04837077840746  | 8.08972485119724  |
| H  | 4.09571701183934  | 1.45111512773068  | 9.04348261397472  |
| C  | 4.67312994782802  | 0.35084498320496  | 7.30164060646461  |
| H  | 5.69703651476900  | 0.20985673289096  | 7.63764733595784  |
| C  | 4.25394395357536  | -0.17088937675464 | 6.07002518831162  |
| H  | 4.93021651749661  | -0.71862882239556 | 5.42250551520201  |
| C  | 2.93213085423543  | 0.02219044317561  | 5.70272586215905  |
| C  | 2.39293915948412  | -0.56368183577599 | 4.41650306061939  |
| H  | 3.21260866199377  | -0.75211451411881 | 3.70808946530109  |
| H  | 1.90710520606669  | -1.51938196716889 | 4.63891306526165  |
| C  | 2.01734275074164  | 1.58214423530932  | 3.35215483052700  |
| H  | 2.15251966623408  | 1.53051816552413  | 2.26458887995689  |
| H  | 3.02152207152723  | 1.62945277368524  | 3.78844191911032  |
| C  | 1.31118374191583  | 2.88084219916179  | 3.69521326953478  |
| C  | 1.64773546495199  | 4.01590209693258  | 2.96632347995293  |
| H  | 2.35363941927847  | 3.95161487064867  | 2.14483713992634  |
| C  | 1.05132602816156  | 5.22709886023494  | 3.32551079313339  |
| H  | 1.31388764860726  | 6.14449729345825  | 2.80508508369401  |
| C  | 0.11594093309765  | 5.25442887574537  | 4.34022086525997  |
| H  | -0.34954736288952 | 6.18540883652294  | 4.63752917356244  |

|   |                   |                   |                   |
|---|-------------------|-------------------|-------------------|
| C | -0.23041109840387 | 4.04537113578104  | 4.99968990160460  |
| C | -2.16034456989405 | 5.08706071393879  | 6.15125302118768  |
| H | -2.33818441671898 | 5.60019063130349  | 5.19715549846763  |
| H | -1.73077431756535 | 5.83425469764484  | 6.83980635074380  |
| C | -3.53273902237938 | 4.62801843828279  | 6.70712140540868  |
| C | -4.43508201956149 | 5.87737608143806  | 6.76858804966000  |
| H | -3.99698486135086 | 6.65859057049604  | 7.40306907419788  |
| H | -5.41641725999632 | 5.62263791740653  | 7.18538623826489  |
| H | -4.59801924554168 | 6.30301052329096  | 5.77055391808373  |
| C | -3.38466680258887 | 4.04790990664387  | 8.12712962256962  |
| H | -2.75286679499162 | 3.15373101032121  | 8.13811201056436  |
| H | -4.36538009133250 | 3.76732772623554  | 8.52912815831233  |
| H | -2.94079077012435 | 4.78367058490711  | 8.80957162657048  |
| C | -4.17218314860319 | 3.58127299901814  | 5.77409160853776  |
| H | -4.27890463270263 | 3.97365495186922  | 4.75534835985922  |
| H | -5.17160374929672 | 3.30864085127328  | 6.13351357486730  |
| H | -3.57495050819929 | 2.66512402497440  | 5.71899500831296  |
| C | 0.51226178105974  | -0.35592379153542 | 2.84195825377436  |
| H | 0.40546274420009  | -1.38392324736111 | 3.19064750384954  |
| H | 0.99945901760131  | -0.38681763452528 | 1.85929567989376  |
| C | -0.93282243617927 | 0.24444828129537  | 2.80094692988146  |
| C | -1.87512942077856 | -0.86239919176051 | 2.26227758970932  |
| C | -2.84900951180007 | -1.41499593066962 | 3.10124724979581  |
| H | -2.94089136679301 | -1.03776283849792 | 4.11266559878585  |
| C | -3.68231951541957 | -2.43857981583894 | 2.64355945382846  |
| H | -4.43201484333739 | -2.85665865349137 | 3.31113073170353  |
| C | -3.55154398546378 | -2.92880799251655 | 1.34373573906696  |
| H | -4.19734886889051 | -3.72911184932808 | 0.99039151599432  |
| C | -2.58330637824716 | -2.38140514395403 | 0.49912391085304  |
| H | -2.47298780197305 | -2.75031056456930 | -0.51777265141724 |
| C | -1.75628489548575 | -1.35352782717345 | 0.95392816626113  |
| H | -1.02572567564049 | -0.92600961708980 | 0.27219109863959  |
| C | -1.08158959762232 | 1.48972882008193  | 1.89376423157444  |
| C | -0.35272513864807 | 1.67868639020504  | 0.71061212941493  |
| H | 0.40561472753944  | 0.96204013821991  | 0.40806224244258  |
| C | -0.58552022196181 | 2.78567803462562  | -0.11186061201219 |
| H | -0.00624752874340 | 2.90662136568125  | -1.02406378574363 |
| C | -1.55655689546328 | 3.72488091728884  | 0.23320068855508  |
| H | -1.74131522697251 | 4.58420184867054  | -0.40674269432950 |
| C | -2.29092702652188 | 3.54606393617244  | 1.40881593703783  |
| H | -3.05495480401675 | 4.26893311066929  | 1.68661501265288  |
| C | -2.05593135221660 | 2.44219324051291  | 2.22788318779540  |
| H | -2.62183702278200 | 2.30312665726269  | 3.14226793355892  |
| C | 0.45866164117799  | -2.14108995803154 | 7.52350303517182  |
| C | 0.45449470194673  | -1.44162054553866 | 8.75024402453830  |
| H | -0.11145795256993 | -0.52054043435185 | 8.83108843776739  |
| C | 1.15757986264633  | -1.91193875857482 | 9.85103219368973  |
| H | 1.15376649006358  | -1.37936404308285 | 10.79511164124213 |
| C | 1.87975513134116  | -3.10339693740158 | 9.73979287060141  |
| C | 1.89673508225281  | -3.83050165745206 | 8.54623615819897  |
| H | 2.45907306567758  | -4.75522490070363 | 8.49343753769737  |

|   |                   |                   |                   |
|---|-------------------|-------------------|-------------------|
| C | 1.19187926314660  | -3.34699829080204 | 7.45171333563392  |
| H | 1.19246560749559  | -3.90628457864934 | 6.52099737357363  |
| N | 1.54574239175332  | 1.93205767727614  | 8.37568063341355  |
| H | 0.56770839578830  | 1.89655042362629  | 8.05561846889887  |
| N | 2.03812602896878  | 0.70572733846088  | 6.45228953499176  |
| N | 1.37263480245247  | 0.33815672833800  | 3.83890640511562  |
| N | 0.42868904082999  | 2.88289703500575  | 4.70915133826329  |
| N | -1.22404485829657 | 3.99755785077266  | 5.91751651393896  |
| H | -1.31739056929557 | 3.11464255970384  | 6.44063901862123  |
| N | 2.63263919526482  | -3.59483546971136 | 10.89219150963199 |
| O | -1.27355407351686 | 0.56441779740139  | 4.11867859249969  |
| O | -0.92357743254077 | 1.53010831557837  | 7.06613053247326  |
| H | -1.59860995061103 | 0.95160684480884  | 7.44455212836432  |
| O | 2.60729330624555  | -2.92747904784455 | 11.92444039076275 |
| O | 3.25564138202209  | -4.64643793169416 | 10.76813857988182 |

**Table S14. DFT optimized coordinates of 4**

|    |                   |                   |                   |
|----|-------------------|-------------------|-------------------|
| Fe | 2.83888465978005  | 1.10382644797706  | 5.53730953430996  |
| C  | 7.07435653393649  | 3.04774201381445  | 7.79724207273529  |
| H  | 7.46523297844487  | 3.85343179720986  | 7.16288263371419  |
| H  | 6.56361739676473  | 2.32411735119654  | 7.15288194618032  |
| H  | 7.93168616985500  | 2.53708005221174  | 8.25250631841972  |
| C  | 5.61676908893385  | 2.45634231603346  | 9.77368385101059  |
| H  | 6.44784297306825  | 1.98808263126740  | 10.31451985105675 |
| H  | 5.13269472457974  | 1.67449462551044  | 9.17970920131994  |
| H  | 4.89765979646606  | 2.82088610631102  | 10.51876249252113 |
| C  | 6.91982460930352  | 4.60457210996594  | 9.76835234091608  |
| H  | 6.28646498408799  | 5.01579410727355  | 10.56461582071237 |
| H  | 7.30724534081271  | 5.44358326567115  | 9.17666727379767  |
| H  | 7.77482546703531  | 4.11105795366269  | 10.24416677750737 |
| C  | 6.14049080373854  | 3.60584847861246  | 8.88908317760258  |
| C  | 4.96995249699123  | 4.39311405646306  | 8.25493807712975  |
| H  | 4.36408180264014  | 4.83139912397493  | 9.06358218202914  |
| H  | 5.38711166758425  | 5.23169154543393  | 7.67685715717681  |
| C  | 3.10390198512089  | 4.10938996599889  | 6.65525218704678  |
| C  | 2.75784031652029  | 5.48713262079757  | 6.70655772537516  |
| C  | 1.72522254372156  | 5.94922310066549  | 5.91525959410999  |
| C  | 1.03180399699164  | 5.06757009434513  | 5.07319745950134  |
| H  | 0.22825888717013  | 5.41096514072777  | 4.43048255541325  |
| C  | 1.40252792557681  | 3.73135408271458  | 5.08835797790558  |
| C  | 0.67148375708551  | 2.69765423423685  | 4.25256363335895  |
| H  | -0.05840151893968 | 2.19399854945642  | 4.89267344745947  |
| H  | 0.13302385470392  | 3.18966835501649  | 3.42922997274018  |
| C  | 0.89599977403258  | 0.42892961768336  | 3.33620408085666  |
| H  | 0.55561106068568  | 0.49913251945592  | 2.29301063097546  |
| H  | 0.01000157312743  | 0.34163882667579  | 3.97229427749533  |
| C  | 1.70675610317876  | -0.84104518394156 | 3.52811433989517  |
| C  | 1.45838531848929  | -1.95540281673534 | 2.73907192798122  |
| H  | 0.73664772180112  | -1.90924914699631 | 1.93021668144367  |

|   |                  |                   |                   |
|---|------------------|-------------------|-------------------|
| C | 2.17035042461358 | -3.12829906233485 | 3.02012004931035  |
| C | 3.10063720139604 | -3.14843780567661 | 4.04067340172022  |
| C | 3.32148732272988 | -1.96688238476113 | 4.79596795058367  |
| C | 5.13941963766589 | -3.00271950326120 | 6.11074207093180  |
| H | 5.73377244240989 | -3.26056981618204 | 5.21988393880413  |
| H | 4.55261509742214 | -3.89645405254146 | 6.37389545921970  |
| C | 6.10640902881997 | -2.69393652922748 | 7.27760039957623  |
| C | 6.98509199288313 | -1.46901606939494 | 6.95070031100706  |
| H | 7.52870749872369 | -1.61353652930084 | 6.00831514496974  |
| H | 7.72786493835208 | -1.31268703319472 | 7.74294371955553  |
| H | 6.39498718138820 | -0.54991460024891 | 6.86685731189441  |
| C | 7.00745072394349 | -3.93288558788395 | 7.45261875394728  |
| H | 6.41727170903384 | -4.83009359675124 | 7.67854768796729  |
| H | 7.71124307821425 | -3.78026255226236 | 8.27897086132981  |
| H | 7.59439105002926 | -4.13315843924839 | 6.54720097878652  |
| C | 5.32310518776877 | -2.45070915594700 | 8.58274438432936  |
| H | 4.68692825769347 | -1.56290305994020 | 8.51235286608047  |
| H | 6.01461164058728 | -2.29678636948462 | 9.42013640133964  |
| H | 4.68339186950185 | -3.30755215987613 | 8.82865808588415  |
| C | 2.54425423829678 | 2.22421513784518  | 2.74338691464797  |
| H | 2.51520999526518 | 3.30845694031902  | 2.86262701918901  |
| H | 2.18343644120933 | 2.00882454784151  | 1.73099644578921  |
| C | 4.04377221425736 | 1.78704995686072  | 2.96751541177629  |
| C | 4.92624689606763 | 2.98355390019351  | 2.52017006890400  |
| C | 5.69125601846398 | 3.67297756933989  | 3.46693214185154  |
| H | 5.67399038823837 | 3.32789235572033  | 4.49435058896321  |
| C | 6.46293313830275 | 4.77548848747591  | 3.09091355039736  |
| H | 7.05635633488304 | 5.29609618871714  | 3.83929156718165  |
| C | 6.47504475626340 | 5.21106699525303  | 1.76496159702704  |
| H | 7.07287609915352 | 6.07130006998188  | 1.47371935186144  |
| C | 5.71456026483619 | 4.52777650585931  | 0.81318591296299  |
| H | 5.71959531314361 | 4.85170779043647  | -0.22507234001121 |
| C | 4.95140525940453 | 3.42098132016549  | 1.18757798252223  |
| H | 4.38663845607098 | 2.88718537740201  | 0.42769371778580  |
| C | 4.48595795503101 | 0.55149974407955  | 2.14198769936474  |
| C | 3.93995375786417 | 0.19166074942522  | 0.90297350410797  |
| C | 4.45238670504271 | -0.88687486773438 | 0.17412941033749  |
| H | 4.00739200473916 | -1.14601545086652 | -0.78342591587516 |
| C | 5.52653307121326 | -1.62350331895629 | 0.66961596867087  |
| H | 5.92791870183523 | -2.45976086686921 | 0.10262197245172  |
| C | 6.08205465972952 | -1.27273262326841 | 1.90345728980138  |
| H | 6.92491556287340 | -1.83451941654329 | 2.29995528483700  |
| C | 5.56700376718692 | -0.20008883832747 | 2.62882298344521  |
| H | 5.99285727002033 | 0.07334845625590  | 3.58794620362057  |
| N | 4.12089676807011 | 3.59057546737698  | 7.38417826421930  |
| H | 4.27638458813071 | 2.57935100127598  | 7.31157960101913  |
| N | 2.40352415044627 | 3.26161381706100  | 5.85864132430241  |
| N | 1.60219672672409 | 1.65926147151035  | 3.75001162917775  |
| N | 2.60150022643078 | -0.84444337092034 | 4.53154447635735  |
| N | 4.23524062534274 | -1.90715315631093 | 5.79292181236853  |
| H | 4.34470302498596 | -1.00788749977311 | 6.27126390692760  |

|   |                   |                   |                   |
|---|-------------------|-------------------|-------------------|
| O | 4.22421303916968  | 1.54640572661794  | 4.32435345138230  |
| O | 3.92342113997959  | 0.69927214380787  | 7.05966811138510  |
| H | 3.45412472895305  | 0.43122459637565  | 7.86284322849203  |
| O | 1.08457386672122  | 0.68375230641354  | 6.40261217067448  |
| H | 2.00070804553731  | -4.02459936548454 | 2.42898112568499  |
| H | 3.66506508559853  | -4.04586506385089 | 4.25883305890486  |
| H | 1.45625764572359  | 7.00208035932684  | 5.94233231561346  |
| H | 3.30117646750495  | 6.16031235318668  | 7.35765439544259  |
| H | 3.10695387480423  | 0.74623257422917  | 0.47947728958250  |
| C | 0.52093068576645  | 0.70409592059055  | 7.58029077429279  |
| C | 1.06388824143549  | 1.41832889119565  | 8.68771286354220  |
| C | 0.43942140748011  | 1.40761357967872  | 9.92506639449941  |
| C | -0.74930156168618 | 0.68963984007083  | 10.09619656333419 |
| C | -1.31891881754931 | -0.01819618145107 | 9.02759957613564  |
| C | -0.69386412128503 | -0.00942604035061 | 7.79445954833555  |
| H | 1.97254284739889  | 1.99459709900548  | 8.54776247000840  |
| H | 0.85144173324469  | 1.95138675194281  | 10.76745244234477 |
| H | -2.24213172765162 | -0.56287112995875 | 9.18808693599837  |
| H | -1.11413036402372 | -0.55706292813785 | 6.95587753094335  |
| N | -1.40201609714210 | 0.68152226348923  | 11.39347501844953 |
| O | -0.87358297049632 | 1.30699482756513  | 12.31364741098514 |
| O | -2.45214960547315 | 0.04950739973815  | 11.51125500104881 |

**Table S15. DFT optimized coordinates of 5**

|    |                   |                  |                   |
|----|-------------------|------------------|-------------------|
| Fe | 4.31513265382965  | 0.69716247839825 | 5.11005644888611  |
| C  | 7.59271979022170  | 3.71256485884542 | 7.01601159599311  |
| H  | 7.40234561130967  | 4.69769436515683 | 6.57072140705439  |
| H  | 7.18886854604950  | 2.95575178781935 | 6.33535444550488  |
| H  | 8.67949129404271  | 3.57186358081866 | 7.06668622228712  |
| C  | 7.26885219375841  | 2.22086422562936 | 9.02888787624930  |
| H  | 8.35077043780486  | 2.08033934926362 | 9.14354547298230  |
| H  | 6.89638338833283  | 1.40980435748254 | 8.39289435147639  |
| H  | 6.81366488198396  | 2.11844606269279 | 10.02261345442914 |
| C  | 7.58373634606553  | 4.69825355870360 | 9.33138205750116  |
| H  | 7.15962368080783  | 4.66267113732203 | 10.34282691164376 |
| H  | 7.40584190992730  | 5.70215282851533 | 8.92489861955924  |
| H  | 8.66815137122770  | 4.56216719501800 | 9.42016953240183  |
| C  | 6.97536830884507  | 3.60985730193103 | 8.42510208378819  |
| C  | 5.45063498832638  | 3.86881800598973 | 8.36566113031527  |
| H  | 5.04294637189358  | 3.83423831045436 | 9.39090878801191  |
| H  | 5.28606189313124  | 4.88991079604149 | 7.99221980291410  |
| C  | 3.48663042087622  | 3.11664382011282 | 7.04846132335800  |
| C  | 2.66024318307525  | 4.18883475568354 | 7.48243305451228  |
| C  | 1.39701372748579  | 4.32269705320114 | 6.93994042922560  |
| C  | 0.94601302105110  | 3.41176681361909 | 5.97288313017249  |
| H  | -0.03111700340395 | 3.50883909193084 | 5.51215243057599  |
| C  | 1.79869338870445  | 2.37747925112838 | 5.61199387188512  |
| C  | 1.40492144888331  | 1.34336893151026 | 4.57557239612195  |
| H  | 1.12726344595759  | 0.41052109472201 | 5.08485087889090  |

|   |                  |                   |                   |
|---|------------------|-------------------|-------------------|
| H | 0.51557812237123 | 1.68518235542902  | 4.01971416859411  |
| C | 2.29720433650948 | -0.21419415126750 | 2.93996203334133  |
| H | 2.96550744625679 | -0.21246045081028 | 2.07369182037392  |
| H | 1.26903458086129 | -0.26866866060508 | 2.54564470329173  |
| C | 2.60709225536916 | -1.46806414968549 | 3.73878941808542  |
| C | 1.96441895449423 | -2.65758712524999 | 3.41644871269766  |
| H | 1.17050090827523 | -2.66794552473879 | 2.67652845842667  |
| C | 2.39322186301150 | -3.83091204139469 | 4.04751568260923  |
| C | 3.43040010823769 | -3.78223394281344 | 4.95796096632012  |
| C | 4.03370333974936 | -2.52992116963859 | 5.25465413457094  |
| C | 5.69111338754919 | -3.57543003905395 | 6.75672368157806  |
| H | 5.97445767755747 | -4.30233806448295 | 5.98027707152950  |
| H | 4.96927630144077 | -4.08524109240834 | 7.41711507151265  |
| C | 6.95199651330748 | -3.23037745679475 | 7.58451045596234  |
| C | 8.01230206066592 | -2.53979198575683 | 6.70435711250910  |
| H | 8.26696544581594 | -3.15685494896850 | 5.83336502627399  |
| H | 8.93261705391216 | -2.37669748853206 | 7.27830498595296  |
| H | 7.67009006310987 | -1.56503982408451 | 6.34380203155076  |
| C | 7.51794247823896 | -4.56479387188888 | 8.11284042635956  |
| H | 6.78715535797366 | -5.08867032486153 | 8.74303432544888  |
| H | 8.41332915400233 | -4.38655547915084 | 8.71986059803407  |
| H | 7.79910963333279 | -5.23520981885093 | 7.29066771978022  |
| C | 6.59223186320031 | -2.32739351506890 | 8.78175846551493  |
| H | 6.23692472742965 | -1.34614138114595 | 8.45262349590799  |
| H | 7.47484824214359 | -2.16369348474374 | 9.41268438681951  |
| H | 5.81713042001419 | -2.79127841126507 | 9.40640993682708  |
| C | 2.94455884478558 | 2.16193799499712  | 2.82910163734212  |
| H | 2.76588479466425 | 3.07330093483902  | 3.40439646426258  |
| H | 2.32769939457258 | 2.21612752736341  | 1.92008194243260  |
| C | 4.49245303295789 | 2.09582160325779  | 2.52268964946354  |
| C | 5.00054865970383 | 3.52888108742261  | 2.21090273014378  |
| C | 6.30241150132473 | 3.86651493849949  | 2.60534869439986  |
| H | 6.88202724065269 | 3.11721511953240  | 3.13346819303308  |
| C | 6.82626347279940 | 5.13196047971742  | 2.34140629566996  |
| H | 7.83992822433077 | 5.37111381758248  | 2.65496652590364  |
| C | 6.05439927064237 | 6.09302660267648  | 1.68197677019108  |
| H | 6.46065470995499 | 7.08077523183700  | 1.47790239258264  |
| C | 4.75437262039433 | 5.77265474027342  | 1.29076638347860  |
| H | 4.13809901544538 | 6.51220332407148  | 0.78400374912832  |
| C | 4.23429616597830 | 4.50108059305120  | 1.55192148283650  |
| H | 3.21605023525399 | 4.28293867613915  | 1.23909448774072  |
| C | 4.77851979088134 | 1.21595822087387  | 1.26799508276283  |
| C | 4.19528557764101 | 1.46444694275928  | 0.01516391288667  |
| C | 4.48150544159477 | 0.65473448625204  | -1.08533364666599 |
| H | 4.01799244415748 | 0.86788410616117  | -2.04596451487326 |
| C | 5.36661843781224 | -0.41896722714286 | -0.95725149846386 |
| H | 5.59399555842341 | -1.04782151375347 | -1.81482826096634 |
| C | 5.96025032993194 | -0.66964082920611 | 0.28099307829046  |
| H | 6.65578126756304 | -1.49899958182890 | 0.39299614088595  |
| C | 5.66857384764483 | 0.14090544576596  | 1.38128118014058  |
| H | 6.12215555049877 | -0.03885192185994 | 2.34958882463501  |



|   |                  |                   |                   |
|---|------------------|-------------------|-------------------|
| N | 4.74773610764998 | 2.93586624417066  | 7.50204061521774  |
| H | 5.19308547291799 | 2.04607698026769  | 7.23534603191600  |
| N | 3.02731143868054 | 2.21649630879337  | 6.13712784849658  |
| N | 2.52533506487883 | 1.02856393935793  | 3.67895298729512  |
| N | 3.59064655474378 | -1.38314001079341 | 4.65850852370102  |
| N | 5.06830896259375 | -2.42524839534809 | 6.12128113468727  |
| H | 5.36650507144652 | -1.46595622099220 | 6.36927444920948  |
| O | 5.14464863315888 | 1.59497810270868  | 3.62625534999416  |
| O | 5.24708647209881 | 0.25315696570430  | 6.79044473416785  |
| H | 1.91657848528164 | -4.78147746760681 | 3.82123357180642  |
| H | 3.77611425443026 | -4.68128505670080 | 5.45183264395993  |
| H | 0.75637465504153 | 5.14074860294124  | 7.26031171447694  |
| H | 3.01876341562031 | 4.88393969182046  | 8.23247985022711  |
| H | 3.52345735030592 | 2.30946847439427  | -0.11422989738445 |
| H | 4.65998503652213 | 0.07176207784302  | 7.54024013937316  |

**Table S16. DFT optimized coordinates of 5•Li(OTf)(THF)**

|    |                   |                  |                   |
|----|-------------------|------------------|-------------------|
| Fe | -1.44839749571276 | 4.75981923720779 | 16.48737898044648 |
| S  | 1.26441896485312  | 2.02314151811087 | 13.57735198194670 |
| Li | -1.38437376893307 | 2.37728852632007 | 15.08522914594699 |
| C  | -3.36167830383667 | 3.73699614300833 | 11.67822996859365 |
| H  | -2.55212288464569 | 3.64420356700066 | 12.40833195742717 |
| H  | -2.91241674146827 | 3.70073722665381 | 10.67853695736099 |
| H  | -4.01914366687873 | 2.86402599064299 | 11.78153950974332 |
| C  | -3.20290186751786 | 6.25303529286809 | 11.73911128087506 |
| H  | -2.39309803787088 | 6.19261262332272 | 12.47294303870853 |
| H  | -3.73993788323909 | 7.19944481952125 | 11.88917400047906 |
| H  | -2.74784080946354 | 6.27964035937268 | 10.74160009512823 |
| C  | -5.23940253356504 | 5.14215459088492 | 10.77212178637047 |
| H  | -4.78486702982265 | 5.11744238937349 | 9.77480745378483  |
| H  | -5.81119891461111 | 6.07566343942150 | 10.85529734349959 |
| H  | -5.94690662471819 | 4.30482314229622 | 10.83468197844732 |
| C  | -4.15274543991405 | 5.04595547878402 | 11.86128296038476 |
| C  | -4.88228912450304 | 5.06509668656268 | 13.22463164464747 |
| H  | -5.51984497424357 | 5.96166095667576 | 13.25793969072863 |
| H  | -5.55646536615613 | 4.19300306031134 | 13.27305937715694 |
| C  | -4.45431654016259 | 5.25885606256558 | 15.63986888205049 |
| C  | -5.84324373092442 | 5.40563496324879 | 15.92362562488622 |
| H  | -6.57077990942836 | 5.35073061092741 | 15.12435736194443 |
| C  | -6.24986586993243 | 5.59390343485126 | 17.22877027245344 |
| H  | -7.30917655181038 | 5.69498804089264 | 17.45308860510610 |
| C  | -5.30307724137935 | 5.64978610088907 | 18.26203880856849 |
| H  | -5.59742392608087 | 5.80427957546585 | 19.29473132151820 |
| C  | -3.96594818843464 | 5.51206193220984 | 17.92001621640512 |
| C  | -2.88241083754069 | 5.69231819394108 | 18.97137400142699 |
| H  | -2.57939054368169 | 6.74687218592907 | 18.95494018965088 |
| H  | -3.29214428861377 | 5.49765729232667 | 19.97469689006894 |
| C  | -0.45710456581207 | 5.55777463947199 | 19.17768566098457 |
| H  | 0.35524914182863  | 4.82648840150023 | 19.15302218782049 |

|   |                   |                   |                   |
|---|-------------------|-------------------|-------------------|
| H | -0.55213789607766 | 5.90331482877022  | 20.21935528467175 |
| C | -0.08564967686775 | 6.72220001496714  | 18.27599563761469 |
| C | 0.48195612670822  | 7.87613253128285  | 18.79099931396396 |
| H | 0.63343917405777  | 7.98727946838184  | 19.85965366044459 |
| C | 0.86841763886811  | 8.87757678885628  | 17.88564320307044 |
| H | 1.32912551942066  | 9.79255748592628  | 18.24948528654091 |
| C | 0.67225817307945  | 8.70611105218463  | 16.53148570541456 |
| H | 0.99063130120959  | 9.46481703819259  | 15.82940521684453 |
| C | 0.06441557737081  | 7.50740612760536  | 16.06538628343623 |
| C | -0.04460228824778 | 8.19483378116035  | 13.65246896111375 |
| H | -0.08332006695822 | 9.21621660996125  | 14.04728365075097 |
| H | -0.93557269605465 | 8.07599417007930  | 13.02225038448520 |
| C | 1.21174435489876  | 8.02913212723162  | 12.75235269720589 |
| C | 2.50342460358920  | 8.22232229046564  | 13.56608370871610 |
| H | 2.57272739075743  | 7.49933468266628  | 14.38663630321754 |
| H | 2.56716448374642  | 9.23312062740755  | 13.98918852900261 |
| H | 3.38188800387789  | 8.07907371405097  | 12.92521123986067 |
| C | 1.12318141823684  | 9.11227331971753  | 11.65955306214614 |
| H | 1.98131190755739  | 9.04668936671872  | 10.97998391049713 |
| H | 1.11663475947516  | 10.12280687085207 | 12.09011294810505 |
| H | 0.21326572983242  | 8.99804328968468  | 11.05640264240473 |
| C | 1.21666892052940  | 6.63533324151806  | 12.09823037442166 |
| H | 2.06913365118772  | 6.53686654582201  | 11.41475052253110 |
| H | 0.30378824885248  | 6.47056970890962  | 11.50972782726305 |
| H | 1.29830992423451  | 5.82986394707502  | 12.83516941006549 |
| C | -1.83762712558550 | 3.47818812422821  | 19.15526229341208 |
| H | -2.90066857985036 | 3.24837146663839  | 19.04492281418911 |
| H | -1.57839374540356 | 3.37844916257320  | 20.21954051816708 |
| C | -1.05639561306415 | 2.47035990714941  | 18.24290247699738 |
| C | -1.55442004735163 | 1.02259700953048  | 18.46673478671417 |
| C | -1.04416972953567 | 0.02472842678300  | 17.61699041113656 |
| H | -0.32672518939089 | 0.29613301818170  | 16.84752123624865 |
| C | -1.44215505938053 | -1.30358301659301 | 17.75323913798070 |
| H | -1.02388879561998 | -2.05823982472392 | 17.09163019316717 |
| C | -2.36285071773015 | -1.66916806997453 | 18.74264732935486 |
| H | -2.67003140990901 | -2.70641064237090 | 18.85121167218038 |
| C | -2.87176918459002 | -0.69116931231387 | 19.59413486344504 |
| H | -3.58231039097282 | -0.95942669466634 | 20.37301793576265 |
| C | -2.46718183689612 | 0.64342567918787  | 19.45872693489211 |
| H | -2.87727974081364 | 1.37591748913609  | 20.14779871790724 |
| C | 0.46025446884699  | 2.48713239257099  | 18.57324416049484 |
| C | 1.40456367929819  | 2.82361617320935  | 17.59675945584094 |
| H | 1.07393996228933  | 3.07364076060113  | 16.59569866325131 |
| C | 2.77163538807017  | 2.82407886554695  | 17.89325395832717 |
| H | 3.48379994607691  | 3.07002016595296  | 17.11028462572340 |
| C | 3.21394633287849  | 2.49394625326617  | 19.17427903111739 |
| H | 4.27650653743294  | 2.49103113767932  | 19.40494374073219 |
| C | 2.27974364326648  | 2.15136453761011  | 20.15692108243367 |
| H | 2.61277146984272  | 1.87803168527730  | 21.15543856975248 |
| C | 0.91794409098896  | 2.14207043177977  | 19.85615824332475 |
| H | 0.20565668541147  | 1.84249217685531  | 20.62172342832920 |

|   |                   |                   |                   |
|---|-------------------|-------------------|-------------------|
| C | 0.95380876548942  | 1.65105674193402  | 11.76491628516743 |
| C | -2.87763763508662 | 0.28167686629570  | 13.53767071419890 |
| H | -1.84859318609633 | 0.25349251329483  | 13.17791338315385 |
| H | -3.55286615365333 | 0.53328125334145  | 12.70512387093946 |
| C | -3.33727367780529 | -0.97959435124772 | 14.26611064324615 |
| H | -2.51108554375858 | -1.38059604107790 | 14.86230605701402 |
| H | -3.68250768997795 | -1.76139355311435 | 13.58204860896172 |
| C | -4.45651398378776 | -0.44393141173771 | 15.18439166024642 |
| H | -4.51297407828996 | -0.99183366687422 | 16.12851730606673 |
| H | -5.43209238829585 | -0.51899193115083 | 14.69080678976445 |
| C | -4.07251689390216 | 1.03941834640281  | 15.40596751751263 |
| H | -4.89417440418190 | 1.72053424349734  | 15.14818463311790 |
| H | -3.74409844242943 | 1.25046539139445  | 16.42639498064579 |
| N | -3.99558211277490 | 5.08089393839139  | 14.38145491189640 |
| H | -2.99254467892176 | 4.85428938165355  | 14.25621959211912 |
| N | -3.54259950733396 | 5.30561822581917  | 16.65491609691051 |
| N | -1.67967503121563 | 4.88400548754329  | 18.71053658566983 |
| N | -0.30797684930844 | 6.54275504538074  | 16.95302161851403 |
| N | -0.18370746161131 | 7.25552623997960  | 14.75872253867608 |
| H | -0.59519524999763 | 6.33796661261040  | 14.54961996590529 |
| O | -1.28527061663618 | 4.48121176098746  | 14.52896793684812 |
| H | -0.45355598682374 | 4.26017051400643  | 14.06911771036738 |
| O | -1.30493663159987 | 2.84239481828111  | 16.92309090812552 |
| O | 0.05051576559110  | 1.43130555252635  | 14.21584683004659 |
| O | 1.26112719763804  | 3.50264315141983  | 13.63356883167157 |
| O | 2.52266909955624  | 1.35712780104223  | 13.89255012844515 |
| O | -2.94935400595586 | 1.31001250528707  | 14.54104391629779 |
| F | -0.19373231335662 | 2.22588608862511  | 11.36129790774380 |
| F | 1.94358364789591  | 2.11662389687159  | 10.99978274006275 |
| F | 0.84406227925759  | 0.33209916345444  | 11.56207111143033 |

**Table S17. DFT optimized coordinates of 6.**

|    |                   |                   |                   |
|----|-------------------|-------------------|-------------------|
| Fe | 12.43767694738493 | 6.50340967439898  | 3.92299587125373  |
| C  | 12.62308550427604 | 9.77744448466385  | 7.87613771662422  |
| H  | 12.55278967051439 | 10.62226704215946 | 7.17888294187809  |
| H  | 12.05983332240987 | 10.03856976168388 | 8.78022034932442  |
| H  | 12.12925192092010 | 8.91606533083094  | 7.41202184078646  |
| C  | 14.74188484866699 | 10.69355530105362 | 8.88449722340344  |
| H  | 14.71217575857882 | 11.56505804100077 | 8.21791532865454  |
| H  | 15.79145772128373 | 10.50212803727446 | 9.14261846610832  |
| H  | 14.21669892997704 | 10.96356326378465 | 9.80818514155486  |
| C  | 14.14141019266299 | 8.26799547244296  | 9.19861578829333  |
| H  | 13.57404475048666 | 8.48949622564339  | 10.11053802020652 |
| H  | 15.17198422392998 | 8.03895140562579  | 9.50026590672260  |
| H  | 13.70765500494729 | 7.36752983427010  | 8.75091003885797  |
| C  | 14.08927722624699 | 9.46131913155398  | 8.22791945567753  |
| C  | 14.88549561669924 | 9.15386134111002  | 6.92920529909922  |
| H  | 14.86848591316621 | 10.04636829801578 | 6.29036147641208  |

|   |                   |                   |                   |
|---|-------------------|-------------------|-------------------|
| H | 15.93740947285026 | 8.96474380817816  | 7.17059776974240  |
| C | 14.82368572256971 | 6.78124078220690  | 6.06054327643535  |
| C | 15.90707395995837 | 6.29951378502906  | 6.84148304565404  |
| H | 16.42911097735399 | 6.96213255060214  | 7.51996510610494  |
| C | 16.25702590606845 | 4.96772742066621  | 6.75149508702262  |
| H | 17.07750332922607 | 4.58483448016956  | 7.35336437448001  |
| C | 15.53690360134323 | 4.10642043580147  | 5.91200776475134  |
| H | 15.76598534172887 | 3.04731659288998  | 5.85434541300583  |
| C | 14.50913942504802 | 4.64866331492510  | 5.15425413502678  |
| C | 13.71402167202096 | 3.77467192907814  | 4.19980333444432  |
| H | 14.20351764676866 | 3.78827114769392  | 3.21900493144429  |
| H | 13.73287102587492 | 2.73017399308423  | 4.54939051052715  |
| C | 11.74952704597610 | 3.88204156424069  | 2.74249966999006  |
| H | 10.71291510707763 | 4.23366738948217  | 2.73704288144218  |
| H | 11.71745483714073 | 2.78780161211998  | 2.61239648837505  |
| C | 12.50688367659667 | 4.51156509262580  | 1.59121184475614  |
| C | 12.72422512951330 | 3.78744813067286  | 0.42748364977580  |
| H | 12.35847168496718 | 2.77031639381283  | 0.34000142630935  |
| C | 13.43229195532769 | 4.40439237660936  | -0.61107254767114 |
| H | 13.62328345218697 | 3.87165351495665  | -1.53934039238624 |
| C | 13.89619128713079 | 5.69270201759835  | -0.44961434708400 |
| H | 14.44329869177569 | 6.18375992155600  | -1.24399295444425 |
| C | 13.63719039270515 | 6.38155456376217  | 0.76836531405881  |
| C | 14.90010105926563 | 8.35123127706387  | -0.02452876118766 |
| H | 14.36013469593083 | 8.42414058444658  | -0.98243110882985 |
| H | 15.80503258635173 | 7.75519499147689  | -0.21446250976447 |
| C | 15.33195183483789 | 9.77547076354645  | 0.39678038481447  |
| C | 16.31154050646273 | 10.27483176038025 | -0.68570170530846 |
| H | 16.63405161613088 | 11.29870992973340 | -0.46473015515562 |
| H | 15.84346816885104 | 10.28136459992263 | -1.67851884044625 |
| H | 17.20876534176461 | 9.64534011377359  | -0.73813787929818 |
| C | 14.11731532114476 | 10.72439793901600 | 0.44903328375016  |
| H | 13.39357343031644 | 10.42708107742486 | 1.21423082772648  |
| H | 13.60380444824228 | 10.75781014833897 | -0.52082668400087 |
| H | 14.44343608375442 | 11.74445016810895 | 0.68618531593304  |
| C | 16.05139559798052 | 9.75538060697284  | 1.76009603868631  |
| H | 16.44112374709134 | 10.75321297946757 | 1.99400742479356  |
| H | 16.89763890887605 | 9.05644917271252  | 1.75378873888912  |
| H | 15.37539414149808 | 9.47030482806828  | 2.57263594223220  |
| C | 11.48884017957966 | 3.98565193386889  | 5.20681966174329  |
| H | 12.14583285596240 | 4.02536299474631  | 6.07920410605262  |
| H | 11.08035898056658 | 2.96656665191629  | 5.14884540390301  |
| C | 10.39628531122344 | 5.09397985882285  | 5.41803153385707  |
| C | 9.96261332385750  | 5.04906633521008  | 6.90776129882216  |
| C | 9.97424284600383  | 6.23623721786752  | 7.64906603514154  |
| H | 10.28446580739575 | 7.14427988099133  | 7.14426547794723  |

|   |                   |                   |                   |
|---|-------------------|-------------------|-------------------|
| C | 9.59555887866898  | 6.24544825018319  | 8.99317484035081  |
| H | 9.60727752757884  | 7.18104363599316  | 9.54844986353220  |
| C | 9.20582815321316  | 5.06287581762841  | 9.62525907397736  |
| H | 8.91095444638621  | 5.06857010463580  | 10.67160385687557 |
| C | 9.19354004825461  | 3.87182580756447  | 8.89645391445520  |
| H | 8.88959952634410  | 2.94285643028665  | 9.37344564885992  |
| C | 9.56430223822572  | 3.86712003604254  | 7.54994871662320  |
| H | 9.53076673461628  | 2.92847717611714  | 7.00310326959548  |
| C | 9.12727839812599  | 4.86684901994736  | 4.54715521931378  |
| C | 8.53525263224823  | 3.60865023364423  | 4.34870228460252  |
| H | 8.97493858698191  | 2.71582067096470  | 4.78630357030714  |
| C | 7.37259224529161  | 3.47181028556580  | 3.58626928680637  |
| H | 6.93676247912364  | 2.48533642378097  | 3.44436224617913  |
| C | 6.77152483571610  | 4.59359040900127  | 3.01229541748852  |
| H | 5.86392188581239  | 4.48826211194037  | 2.42327987605846  |
| C | 7.34573505112553  | 5.85164263568920  | 3.20693837534277  |
| H | 6.88810153255867  | 6.73573811810300  | 2.77096505699038  |
| C | 8.51138707756493  | 5.98368018065021  | 3.96502386535107  |
| H | 8.96139459192768  | 6.95774995666702  | 4.12091953006667  |
| C | 10.84086362629299 | 9.29076996484834  | 3.03070842646446  |
| C | 10.44453740774075 | 9.14537863521913  | 1.68858811984872  |
| H | 11.15927210395015 | 8.78169449786182  | 0.95666170477427  |
| C | 9.15132810859305  | 9.46699042099835  | 1.28436162789693  |
| H | 8.86478081519633  | 9.35078055944216  | 0.24334472044824  |
| C | 8.22351781928585  | 9.94731449897072  | 2.21470126076313  |
| C | 8.60432004819602  | 10.09967393134898 | 3.55356165894790  |
| H | 7.89037622465700  | 10.47459889903050 | 4.28049536127714  |
| C | 9.89802969666876  | 9.77705352475728  | 3.95437246787804  |
| H | 10.18933877134195 | 9.89705671492095  | 4.99244321582642  |
| N | 14.37142296591962 | 8.05595398152301  | 6.12605483600819  |
| H | 13.56553809382039 | 8.26640928994918  | 5.53856630749552  |
| N | 14.17436941958970 | 5.95614362143333  | 5.19205566307353  |
| N | 12.34001457654870 | 4.26851823681132  | 4.02755643910244  |
| N | 12.94731982213026 | 5.77807977604247  | 1.78032851630293  |
| N | 14.08434371414131 | 7.64668668366913  | 0.95861261138214  |
| H | 13.69119623636675 | 8.16107323092249  | 1.75398003903195  |
| O | 10.97781656775972 | 6.31572599442935  | 5.13285861171583  |
| S | 12.50082347452139 | 8.90688942945135  | 3.55488383536238  |
| C | 6.81266183063431  | 10.23583483821028 | 1.79144347340289  |
| F | 6.23228221357982  | 11.19244098705632 | 2.54691819744341  |
| F | 6.73355535120766  | 10.64153399360109 | 0.50473612686330  |
| F | 6.01069855563925  | 9.14095970794286  | 1.88878238899282  |

**Table S18. DFT optimized coordinates of 7.**

|    |                   |                   |                   |
|----|-------------------|-------------------|-------------------|
| Fe | 0.05620051382324  | 0.68217697925770  | 5.40130716032123  |
| S  | -0.32527872034059 | -1.67161812661806 | 6.04837900441881  |
| C  | 0.63721232612818  | 4.13124832031676  | 9.56263240139211  |
| H  | 0.21436820677990  | 3.87948543045910  | 8.58503197206136  |
| H  | 1.50273550497431  | 4.78581155275669  | 9.39703607931414  |
| H  | -0.11495515160252 | 4.70529654406193  | 10.11817426713114 |
| C  | 1.64419618108373  | 3.29657318009028  | 11.71034423134733 |
| H  | 2.52501631426221  | 3.93702458672319  | 11.57369401571881 |
| H  | 1.94514139432430  | 2.42481827251796  | 12.30400487077430 |
| H  | 0.90862468745735  | 3.86196214925554  | 12.29508088198469 |
| C  | -0.18410901825453 | 1.97642732257773  | 10.61590597175560 |
| H  | -0.93072078568120 | 2.51645068143372  | 11.21143706300829 |
| H  | 0.10425567779778  | 1.07544649807230  | 11.16930893147850 |
| H  | -0.66634814120770 | 1.65993478970344  | 9.68587041640337  |
| C  | 1.04159064884575  | 2.87298179945013  | 10.35403756618937 |
| C  | 2.14341784321587  | 2.09337923945631  | 9.60252178527263  |
| H  | 3.02493057811765  | 2.74624039806278  | 9.52715412548709  |
| H  | 2.43653254897382  | 1.22335805438528  | 10.21117162934933 |
| C  | 2.64403899811058  | 1.02891464528732  | 7.44462518655289  |
| C  | 4.00874559284447  | 0.84289559175305  | 7.81588195701961  |
| H  | 4.35905036597731  | 1.19591381935882  | 8.77630970087927  |
| C  | 4.87059907231553  | 0.20853559163891  | 6.94835380994217  |
| H  | 5.91220571817733  | 0.06918836488511  | 7.22644755805177  |
| C  | 4.39957042584049  | -0.25462170460958 | 5.71074881433223  |
| H  | 5.05090499791555  | -0.75576035657640 | 5.00259101699757  |
| C  | 3.05973761314781  | -0.05696085896445 | 5.41557936764707  |
| C  | 2.46376021511434  | -0.59577706214042 | 4.13529839466597  |
| H  | 3.24921588224684  | -0.75683273555879 | 3.38225034467513  |
| H  | 1.99073588245885  | -1.56031531233432 | 4.34895376669840  |
| C  | 2.02591313898000  | 1.58694618155756  | 3.17875125467897  |
| H  | 2.12555300166333  | 1.57523884412942  | 2.08605816755563  |
| H  | 3.04333608913162  | 1.63063527520399  | 3.58370569258555  |
| C  | 1.31972275882455  | 2.86476092192140  | 3.59260560293119  |
| C  | 1.61539213597244  | 4.02664471356177  | 2.88768514026668  |
| H  | 2.28517083440988  | 3.99627800781720  | 2.03460800423859  |
| C  | 1.02607774396018  | 5.21969005540139  | 3.31298806989608  |
| H  | 1.25850250104546  | 6.15632052126812  | 2.81273434056626  |
| C  | 0.13693344577133  | 5.20481090108917  | 4.36870056316752  |
| H  | -0.32117340307213 | 6.12122083896897  | 4.71827870437288  |
| C  | -0.17019555544899 | 3.97114132579251  | 5.00206197293628  |
| C  | -2.04936396990893 | 4.95562735959024  | 6.27938922335527  |
| H  | -2.27792829609041 | 5.50025510440383  | 5.35373054897318  |
| H  | -1.59185036463871 | 5.68231033369646  | 6.97220548957350  |
| C  | -3.38898443354716 | 4.46441117104199  | 6.88522075653547  |
| C  | -4.29899701427909 | 5.70103289170250  | 7.02958959313389  |
| H  | -3.83710150837956 | 6.46769418856023  | 7.66523347327388  |
| H  | -5.25614531517825 | 5.42378361263346  | 7.48637101279151  |
| H  | -4.51585912649834 | 6.15499368741323  | 6.05446281245936  |

|   |                   |                   |                   |
|---|-------------------|-------------------|-------------------|
| C | -3.16722746954763 | 3.84120395714314  | 8.27750393331501  |
| H | -2.52998975840890 | 2.95224815403166  | 8.22951323698560  |
| H | -4.12499599527832 | 3.54048930675988  | 8.71873680471603  |
| H | -2.69418386734810 | 4.55858613373185  | 8.95982170448281  |
| C | -4.06131887730447 | 3.44021065691173  | 5.95004288335674  |
| H | -4.21284511222051 | 3.85987143540295  | 4.94791736643668  |
| H | -5.04346966243240 | 3.15092978237095  | 6.34268405315634  |
| H | -3.46125748908238 | 2.53057277717755  | 5.84506401064744  |
| C | 0.52351511624810  | -0.34744415741846 | 2.65216360725644  |
| H | 0.44112081441494  | -1.38976617935698 | 2.96549419984638  |
| H | 0.97544710591855  | -0.34095525277747 | 1.65143481025115  |
| C | -0.92838665732522 | 0.23370451004208  | 2.68934243223365  |
| C | -1.86969608300594 | -0.87428519100912 | 2.14831167485528  |
| C | -2.73541409806711 | -1.53609304492506 | 3.02665527287130  |
| H | -2.75327566141593 | -1.23499267530390 | 4.06761063783436  |
| C | -3.55576037742706 | -2.57036338692893 | 2.56934943563292  |
| H | -4.22059264750400 | -3.07371530355239 | 3.26728482363831  |
| C | -3.51976844479660 | -2.96250267157233 | 1.23046919310564  |
| H | -4.15527254702319 | -3.77093283456685 | 0.87671252320325  |
| C | -2.65953356059284 | -2.30637179914420 | 0.34751348638242  |
| H | -2.62368498760425 | -2.59826448526286 | -0.69960327870797 |
| C | -1.84520597136227 | -1.26813083260018 | 0.80251940546085  |
| H | -1.20036731975290 | -0.75567616502606 | 0.09380368399946  |
| C | -1.13336402022434 | 1.50953281499352  | 1.83914098593215  |
| C | -0.45235023976623 | 1.76278064439615  | 0.64013018860278  |
| H | 0.30922128234158  | 1.07609014571545  | 0.28086380067417  |
| C | -0.73700871623427 | 2.89747248412994  | -0.12618198160374 |
| H | -0.19363817565095 | 3.06877427301272  | -1.05229582883324 |
| C | -1.71359879733507 | 3.79995112045445  | 0.29231905636491  |
| H | -1.93882444666023 | 4.68065113438746  | -0.30410555659771 |
| C | -2.40055753583473 | 3.55718209909958  | 1.48483312676106  |
| H | -3.16797813342777 | 4.25169111933400  | 1.81985923606935  |
| C | -2.11339095222957 | 2.42630911943531  | 2.24797463458550  |
| H | -2.64241777402125 | 2.23812001346065  | 3.17580255965610  |
| C | 0.26851380309985  | -1.89185306201250 | 7.70816497293844  |
| C | -0.60817960562208 | -1.72477828214107 | 8.79953925671451  |
| H | -1.65370057236294 | -1.50070126158870 | 8.60606901310370  |
| C | -0.16201478004886 | -1.85605363187989 | 10.11096594359978 |
| H | -0.85455915233850 | -1.71861035140151 | 10.93628515732947 |
| C | 1.17890266341877  | -2.16620388625602 | 10.36700737827071 |
| C | 2.05521416096053  | -2.37604411522455 | 9.29659464574390  |
| H | 3.09073936896648  | -2.64003836616404 | 9.48802867694255  |
| C | 1.60146538649546  | -2.24955309695624 | 7.98616855168753  |
| H | 2.28759509737109  | -2.42297250681470 | 7.16357498487441  |
| N | 1.77146220177165  | 1.65580481120132  | 8.26029503179007  |
| H | 0.78311625645785  | 1.64502934243640  | 7.96470256901378  |
| N | 2.19388418801972  | 0.57501324977608  | 6.23829785441106  |
| N | 1.41319570260907  | 0.31799987971032  | 3.64119967354329  |
| N | 0.48267828606865  | 2.82434823764506  | 4.64279663177666  |
| N | -1.12058904437118 | 3.88285626386053  | 5.96112133161304  |
| H | -1.17587890112780 | 2.98325671657071  | 6.46235053296621  |

|   |                    |                   |                   |
|---|--------------------|-------------------|-------------------|
| O | -1.21708855114302  | 0.49475965827287  | 4.03031129244524  |
| O | -0.73349476685228  | 1.39912852012503  | 7.00605211329843  |
| H | -1.347044440030825 | 0.79894730130420  | 7.44973096508110  |
| C | 1.68543931958740   | -2.18248860889819 | 11.77835442557712 |
| F | 2.78399608619150   | -2.95059543078534 | 11.93080217325172 |
| F | 2.03831473683430   | -0.93317047898264 | 12.20178121780248 |
| F | 0.76196554072006   | -2.62352219479932 | 12.65792676948947 |

**Table S19. Single point energy calculation of the different isomers of 3 and 4**

| <b>Complex</b> | <b><math>E^a</math> (<i>trans</i>-pyridine<sup>c</sup> isomer) in <math>E_h^b</math></b> | <b><math>E^a</math> (<i>trans</i>-alkoxide isomer<sup>d</sup>) in <math>E_h^b</math></b> | <b><math>\Delta E</math> (<i>trans</i>-pyridine – <i>trans</i>-alkoxide) in <math>E_h^b</math></b> | <b><math>\Delta E</math> (<i>trans</i>-pyridine – <i>trans</i>-alkoxide) in kcal/mol</b> | <b>More stable isomer by DFT</b> | <b>Isomer Observed by crystallography</b> |
|----------------|------------------------------------------------------------------------------------------|------------------------------------------------------------------------------------------|----------------------------------------------------------------------------------------------------|------------------------------------------------------------------------------------------|----------------------------------|-------------------------------------------|
| <b>3</b>       | -3939.02463210004                                                                        | -3938.844536257419                                                                       | +0.18009564                                                                                        | <b>-113.29</b>                                                                           | <i>trans</i> -pyridine           | <i>trans</i> -pyridine                    |
| <b>4</b>       | -3614.422050693938                                                                       | -3614.790406913627                                                                       | +0.368356219                                                                                       | <b>+231.14</b>                                                                           | <i>trans</i> -alkoxide           | <i>trans</i> -alkoxide                    |

*a* = calculated single-point energy using B3LYP/6-311g\*

*b* = Hartree

*c* = ArX group is positioned *trans* to pyridine ring

*d* = ArX group is positioned *trans* to alkoxide oxygen



### E. Supporting Figures.

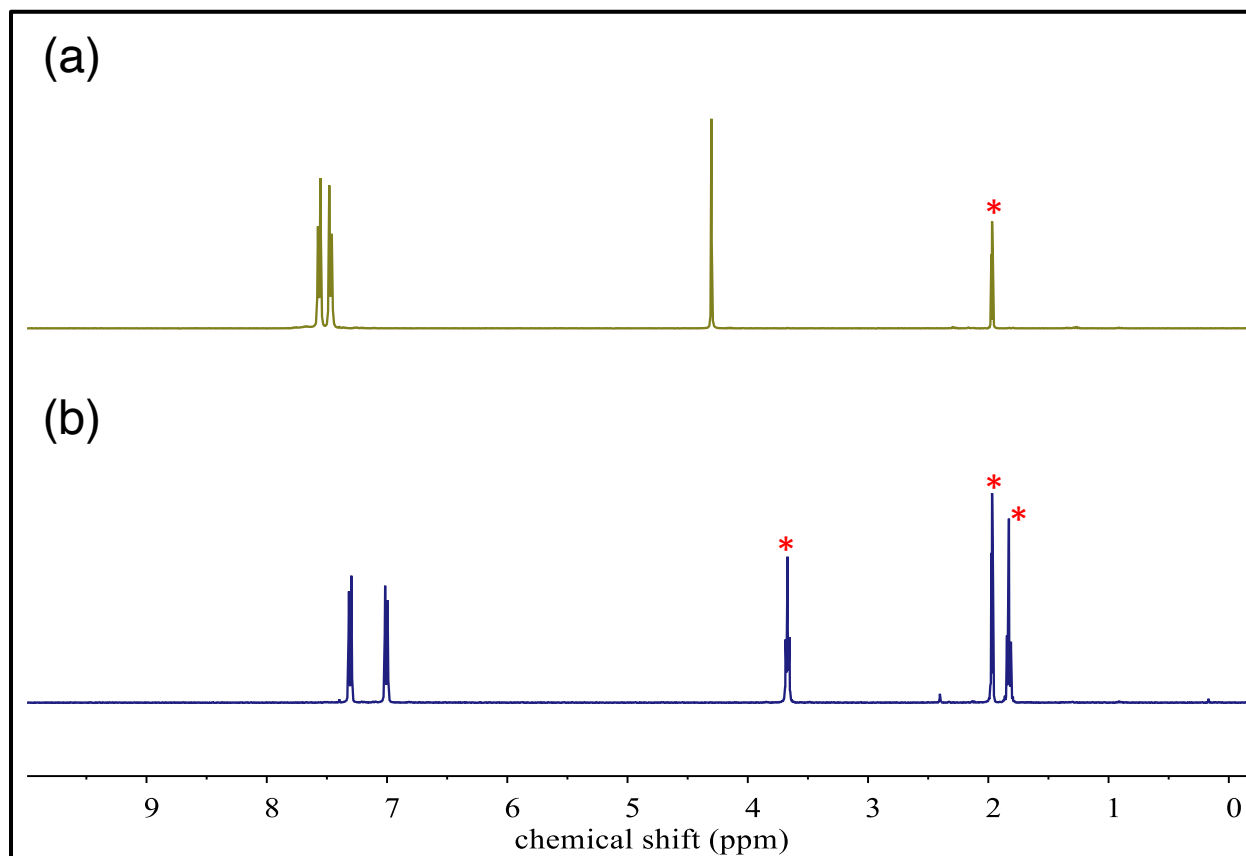

**Figure S1.**  $^1\text{H}$  NMR spectra of (a)  $p\text{-CF}_3\text{-PhSH}$  and (b)  $\text{NaSPh}^{p\text{-CF}_3}$  in  $\text{CD}_3\text{CN}$  at  $23^\circ\text{C}$ . Residual solvents ( $\text{CH}_3\text{CN}$ , THF) are marked with a red asterisk (\*). The upfield shift of the aromatic protons (7.32 – 7.02 ppm) and absence of the singlet assigned to the  $-\text{SH}$  proton (4.30 ppm) in the bottom spectrum indicates successful deprotonation of the thiol compound.

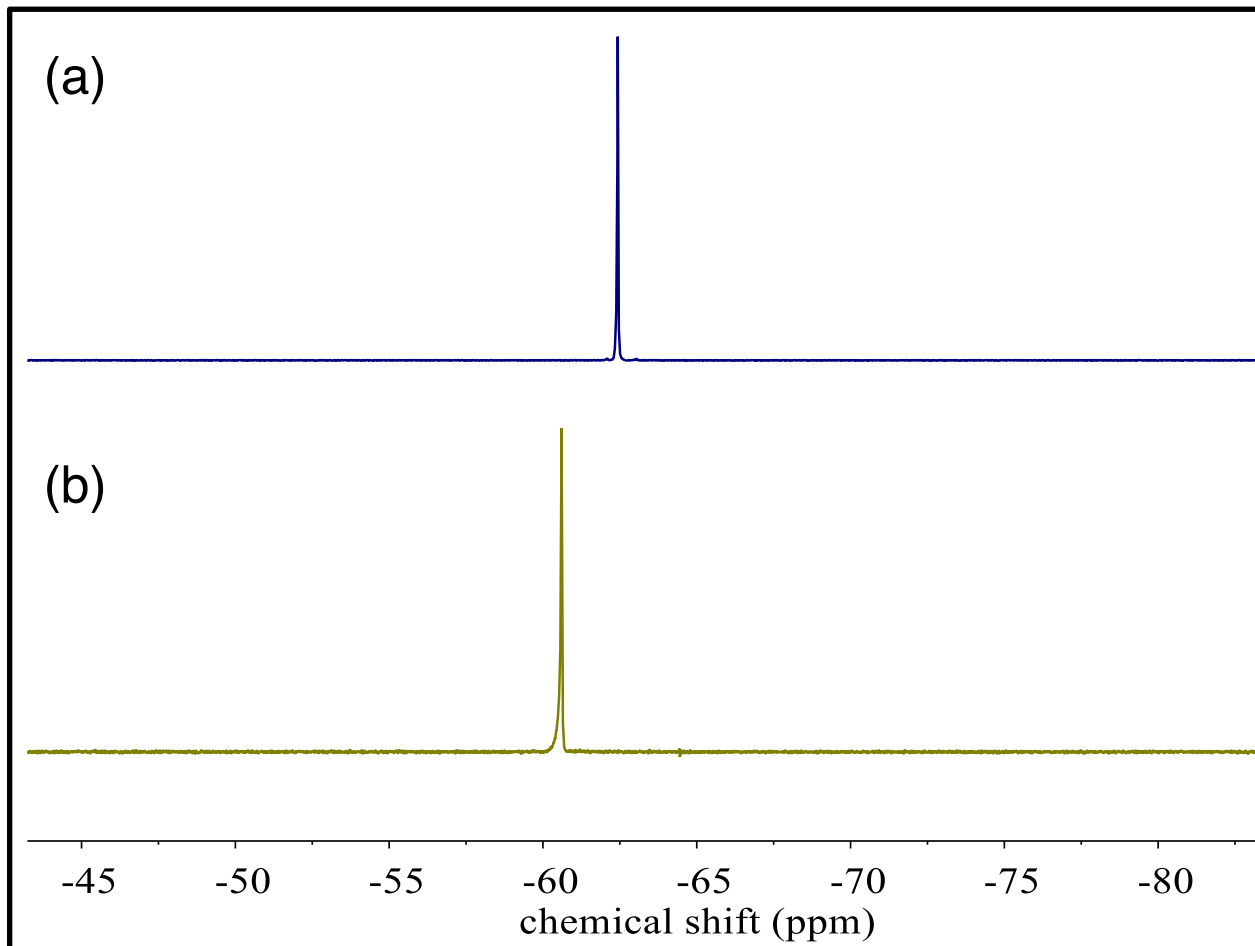

**Figure S2.**  $^{19}\text{F}$  NMR spectra of (a)  $p\text{-CF}_3\text{-PhSH}$  and (b)  $\text{NaSPh}^{p\text{-CF}_3}$  in  $\text{CD}_3\text{CN}$  at 23 °C.

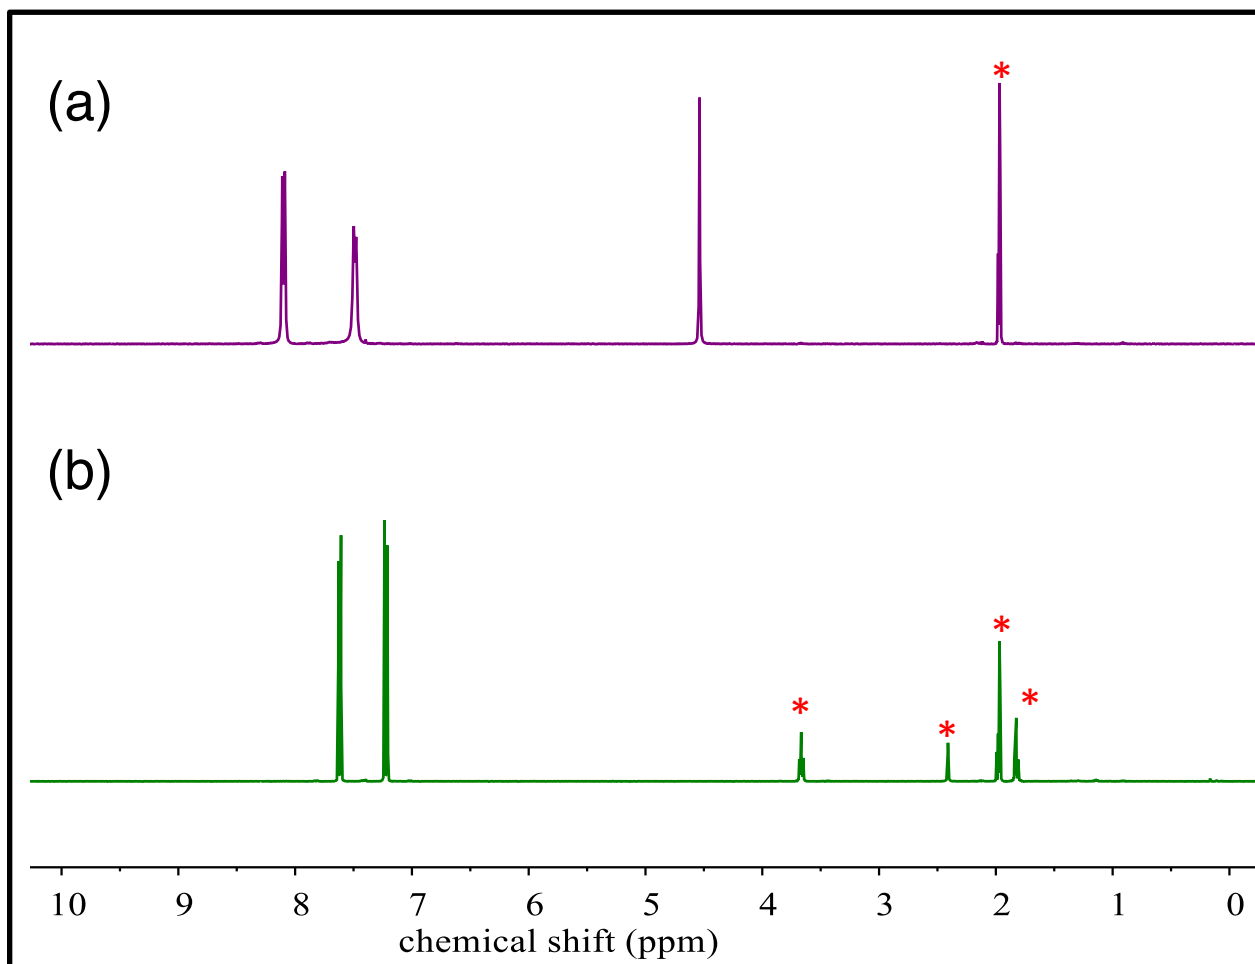

**Figure S3.** <sup>1</sup>H NMR spectra of (a) *p*-NO<sub>2</sub>-PhSH and (b) NaSPh<sup>*p*-NO<sub>2</sub></sup> in CD<sub>3</sub>CN at 23 °C. Residual solvent (CH<sub>3</sub>CN, THF) are marked with a red asterisk (\*). The upfield shift of the aromatic protons (7.61 – 7.21 ppm) and absence of the singlet assigned to the -SH proton (4.55 ppm) in the bottom spectrum indicates successful deprotonation of the thiol compound.

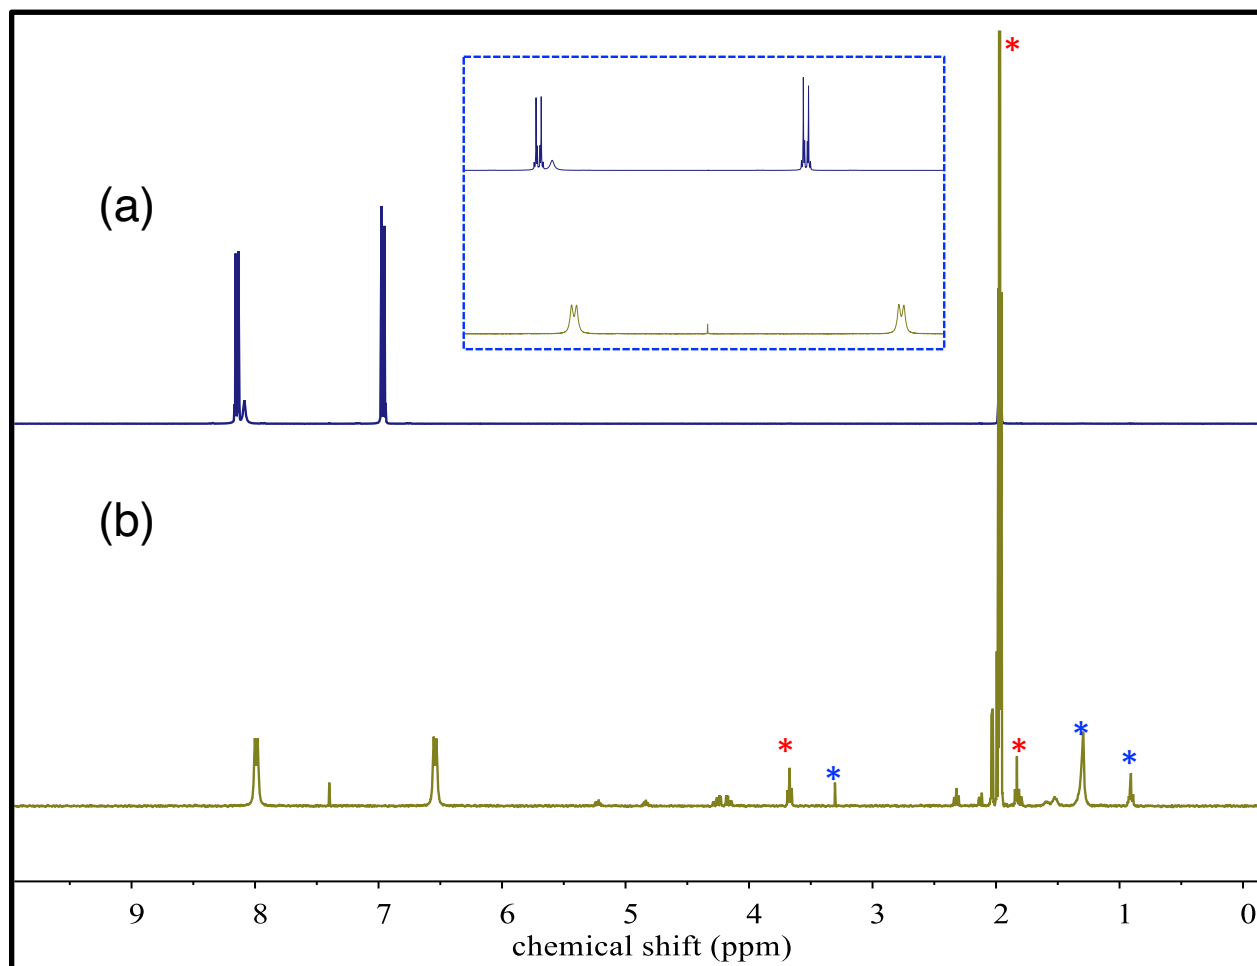

**Figure S4.**  $^1\text{H}$  NMR spectra of (a)  $p\text{-NO}_2\text{-PhOH}$  and (b)  $\text{NaOPh}^{p\text{-NO}_2}$  in  $\text{CD}_3\text{CN}$  at  $23\text{ }^\circ\text{C}$ . Residual solvent ( $\text{CH}_3\text{CN}$ , THF) are marked with a red asterisk (\*). Some unknown impurities are marked with a blue asterisk (\*). The upfield shift of the aromatic protons (8.00 – 6.53 ppm) and absence of the singlet assigned to the  $\text{-OH}$  proton (8.09 ppm) in the bottom spectrum indicates successful deprotonation of the thiol compound.

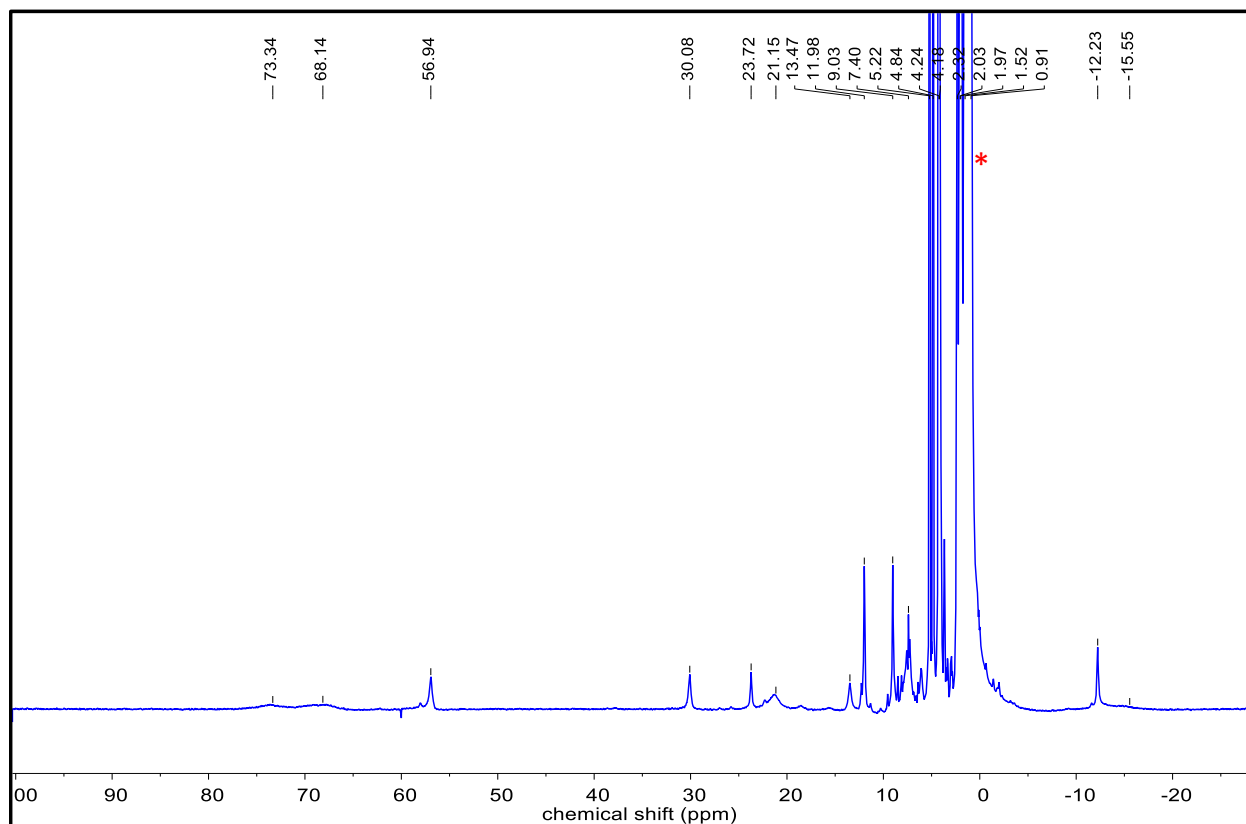

**Figure S5.**  $^1\text{H}$  NMR spectrum of  $\text{Fe}^{\text{II}}(\text{BNPA}^{\text{Ph}_2\text{O}})(\text{SPh}^{p\text{-NO}_2})$  (**1**) in  $\text{CD}_3\text{CN}$  at 23 °C. Residual solvent peak for  $\text{CD}_3\text{CN}$  is marked with a red asterisk (\*).

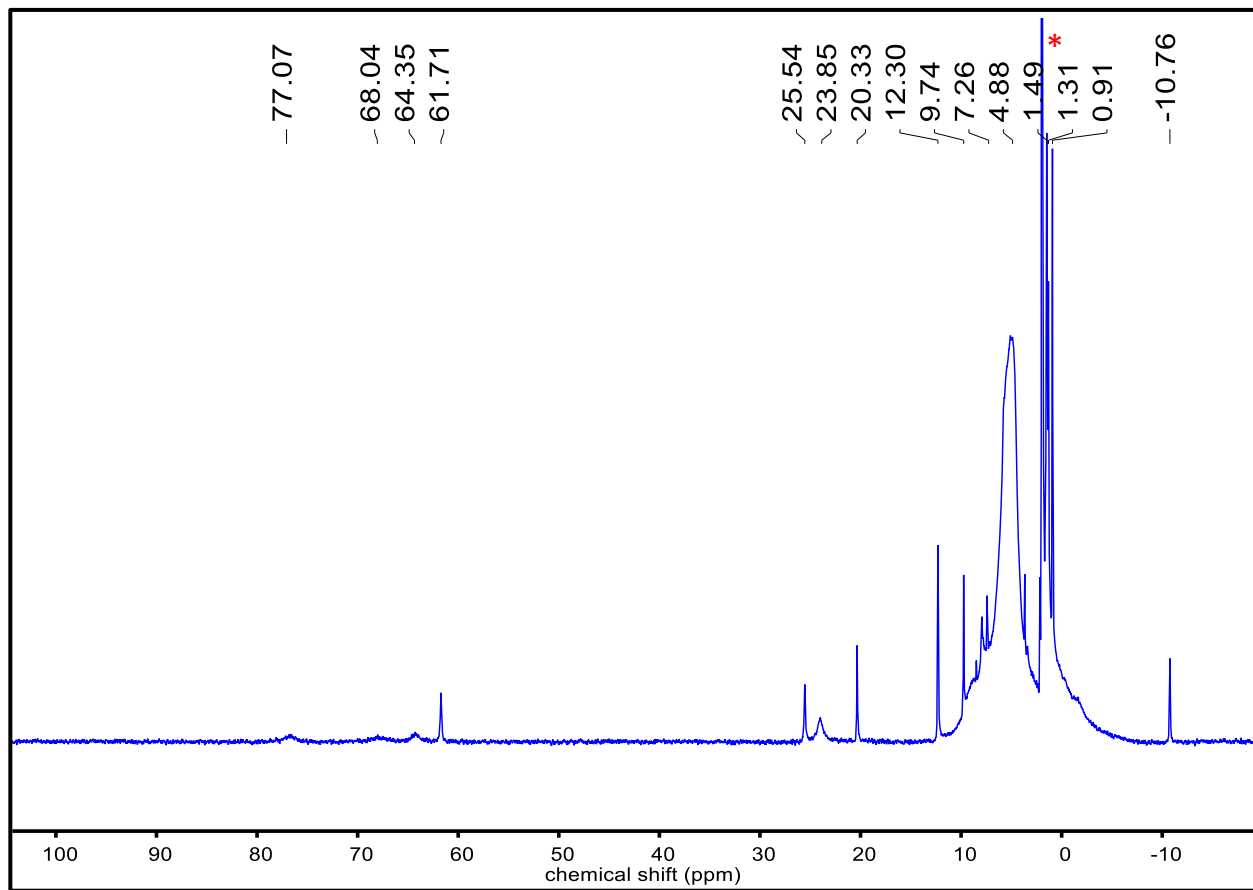

**Figure S6.** <sup>1</sup>H NMR spectrum of Fe<sup>II</sup>(BNPA<sup>Ph<sub>2</sub>O</sup>)(OPh<sup>*p*-NO<sub>2</sub></sup>) (**2**) in CD<sub>3</sub>CN at 23 °C. Residual solvent peak for CD<sub>3</sub>CN is marked with a red asterisk (\*).

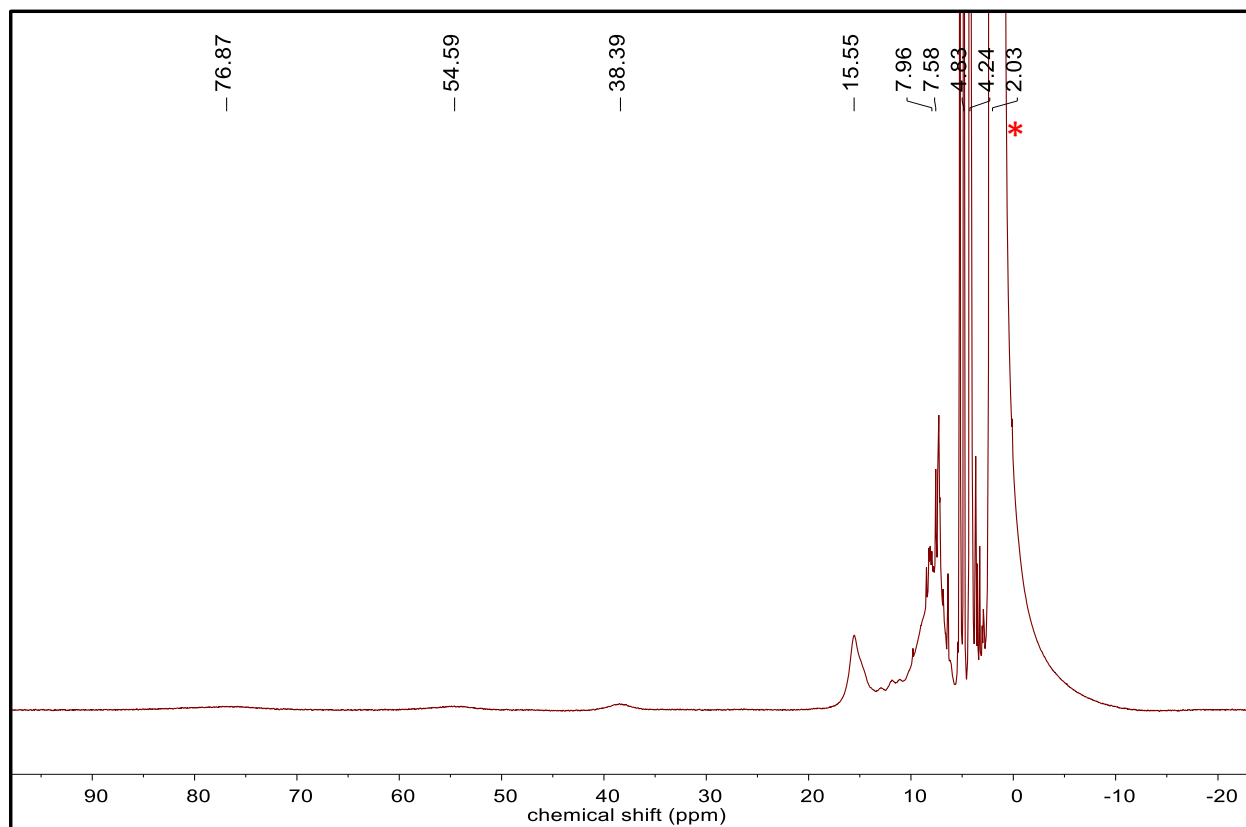

**Figure S7.** <sup>1</sup>H NMR spectrum of Fe<sup>III</sup>(BNPA<sup>Ph<sub>2</sub>O</sup>)(OH)(SPh<sup>p-NO<sub>2</sub></sup>) (**3**) in CD<sub>3</sub>CN at 23 °C. Residual solvent peak for CD<sub>3</sub>CN is marked with a red asterisk (\*).

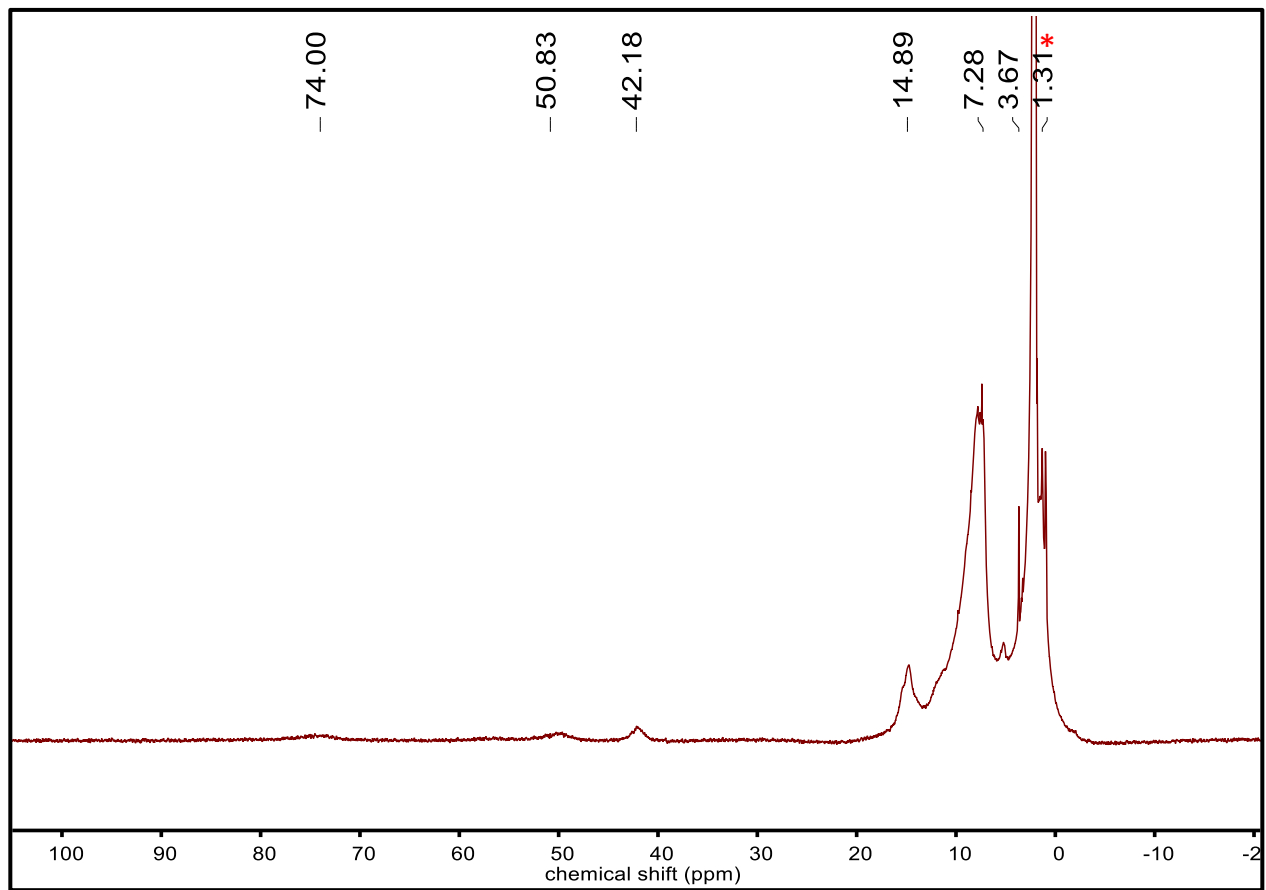

**Figure S8.** <sup>1</sup>H NMR spectrum of Fe<sup>III</sup>(BNPA<sup>Ph<sub>2</sub>O</sup>)(OH)(OPh<sup>*p*-NO<sub>2</sub></sup>) (**4**) in CD<sub>3</sub>CN at 23 °C. Residual solvent peak for CD<sub>3</sub>CN is marked with a red asterisk (\*).



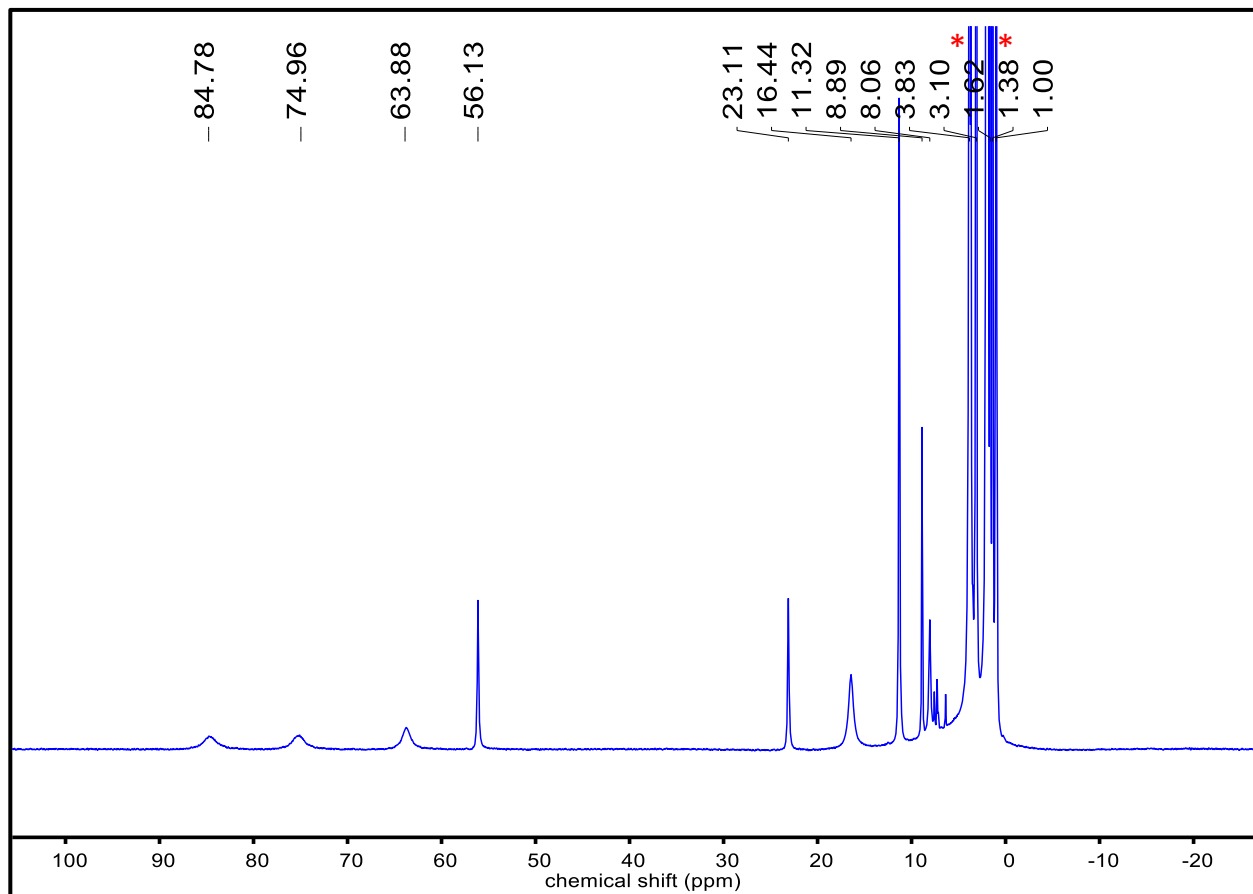

**Figure S9.** <sup>1</sup>H NMR spectrum of Fe<sup>II</sup>(BNPA<sup>Ph2O</sup>)(OH) (**5**) in CD<sub>3</sub>CN at 23 °C. Residual solvent peak for CD<sub>3</sub>CN and peaks for Bu<sub>4</sub>N<sup>+</sup> are marked with a red asterisk (\*).

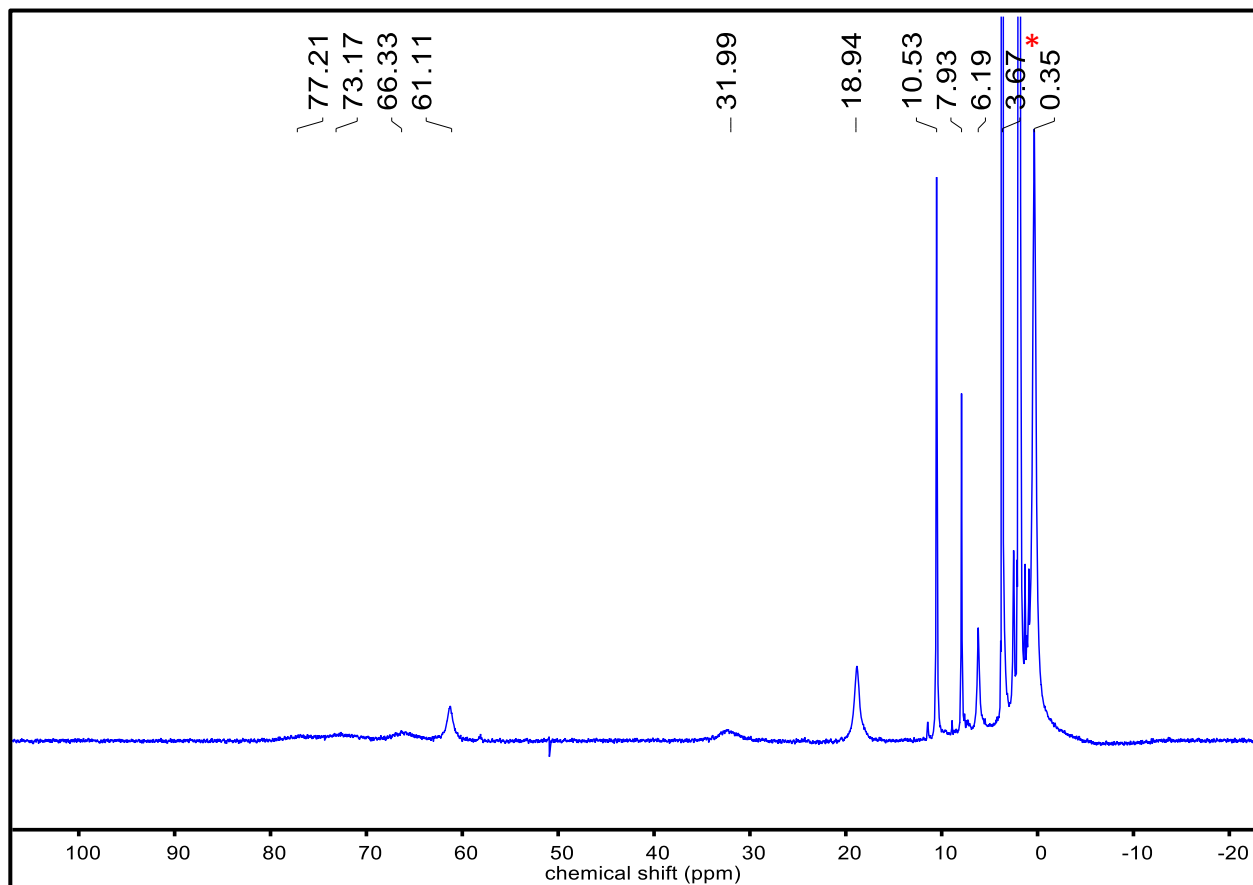

**Figure S10.** <sup>1</sup>H NMR spectrum of Fe<sup>II</sup>(BNPA<sup>Ph<sub>2</sub>O</sup>)(OH)•LiOTf (**5•LiOTf**) in CD<sub>3</sub>CN at 23 °C. Residual solvent peak for CD<sub>3</sub>CN is marked with a red asterisk (\*).

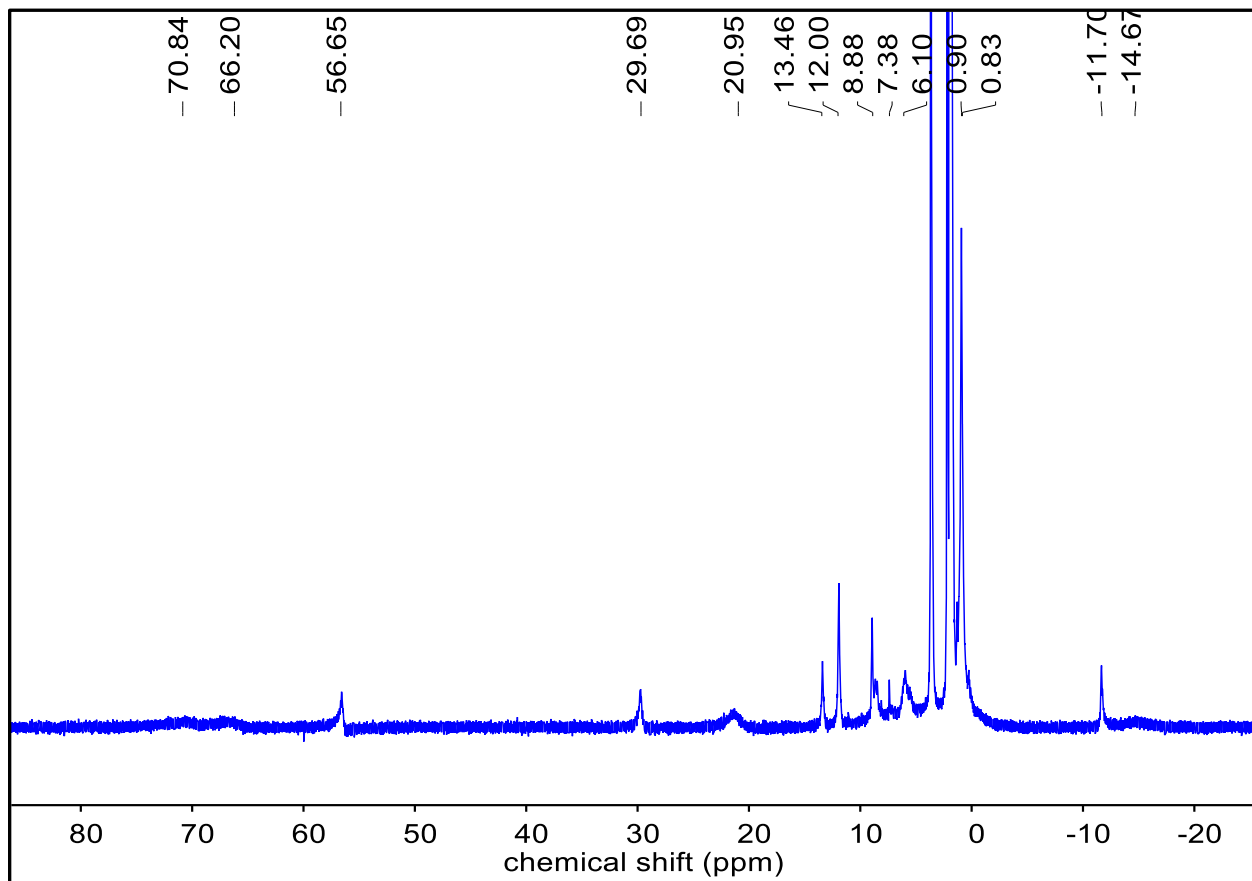

**Figure S11.**  $^1\text{H}$  NMR spectrum of  $\text{Fe}^{\text{II}}(\text{BNPA}^{\text{Ph}_2\text{O}})(\text{SPh}^{p\text{-CF}_3})$  (**6**) in  $\text{CD}_3\text{CN}$  at 23 °C. Residual solvent peak for  $\text{CD}_3\text{CN}$  peak is marked with a red asterisk (\*).

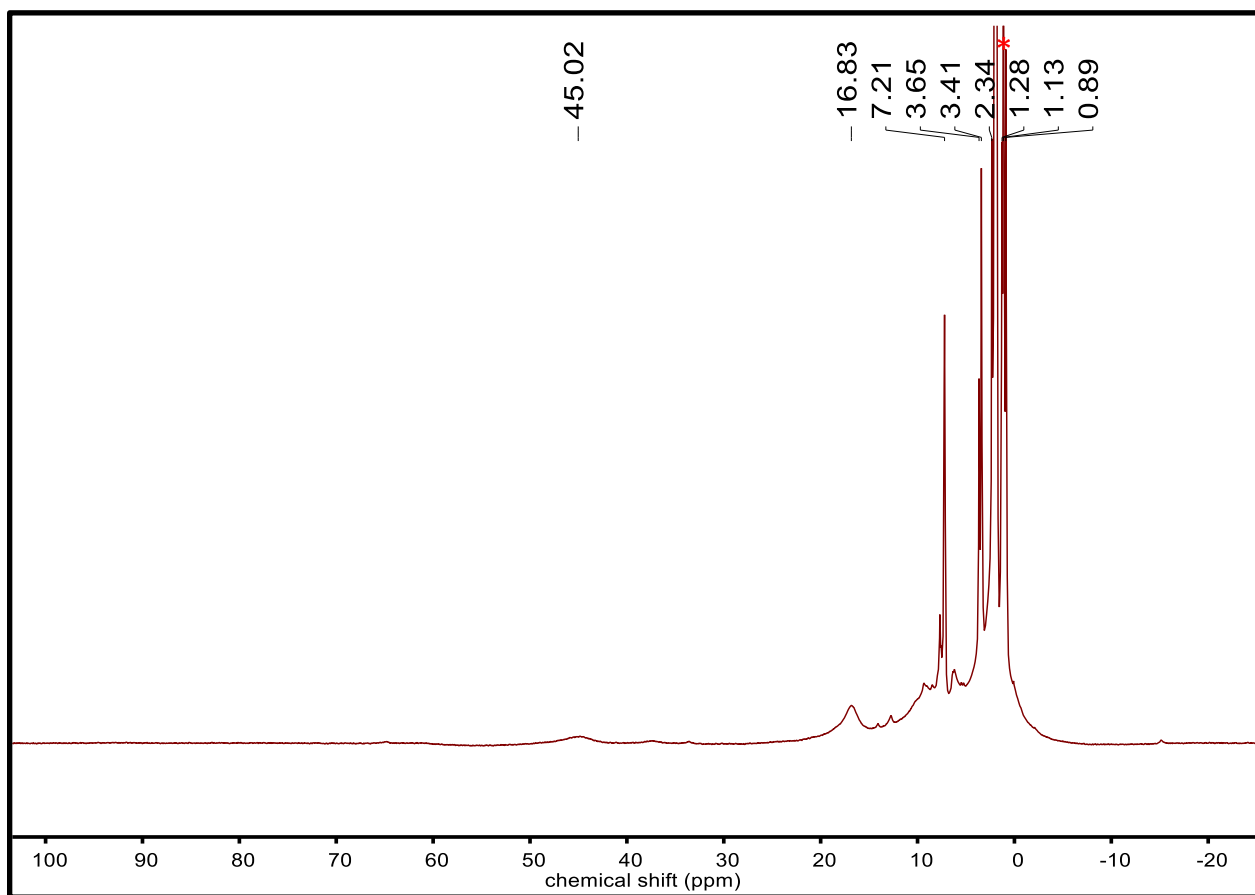

**Figure S12.** <sup>1</sup>H NMR spectrum of Fe<sup>III</sup>(BNPA<sup>Ph2O</sup>)(OH)(SPh<sup>p-CF<sub>3</sub></sup>) (**7**) by adding 1 equiv NaSPh<sup>p-CF<sub>3</sub></sup> to Fe<sup>III</sup>(BNPA<sup>Ph2O</sup>)(OH)(OTf) in CD<sub>3</sub>CN at -35 °C. Residual solvent peak for CD<sub>3</sub>CN is marked with a red asterisk (\*).

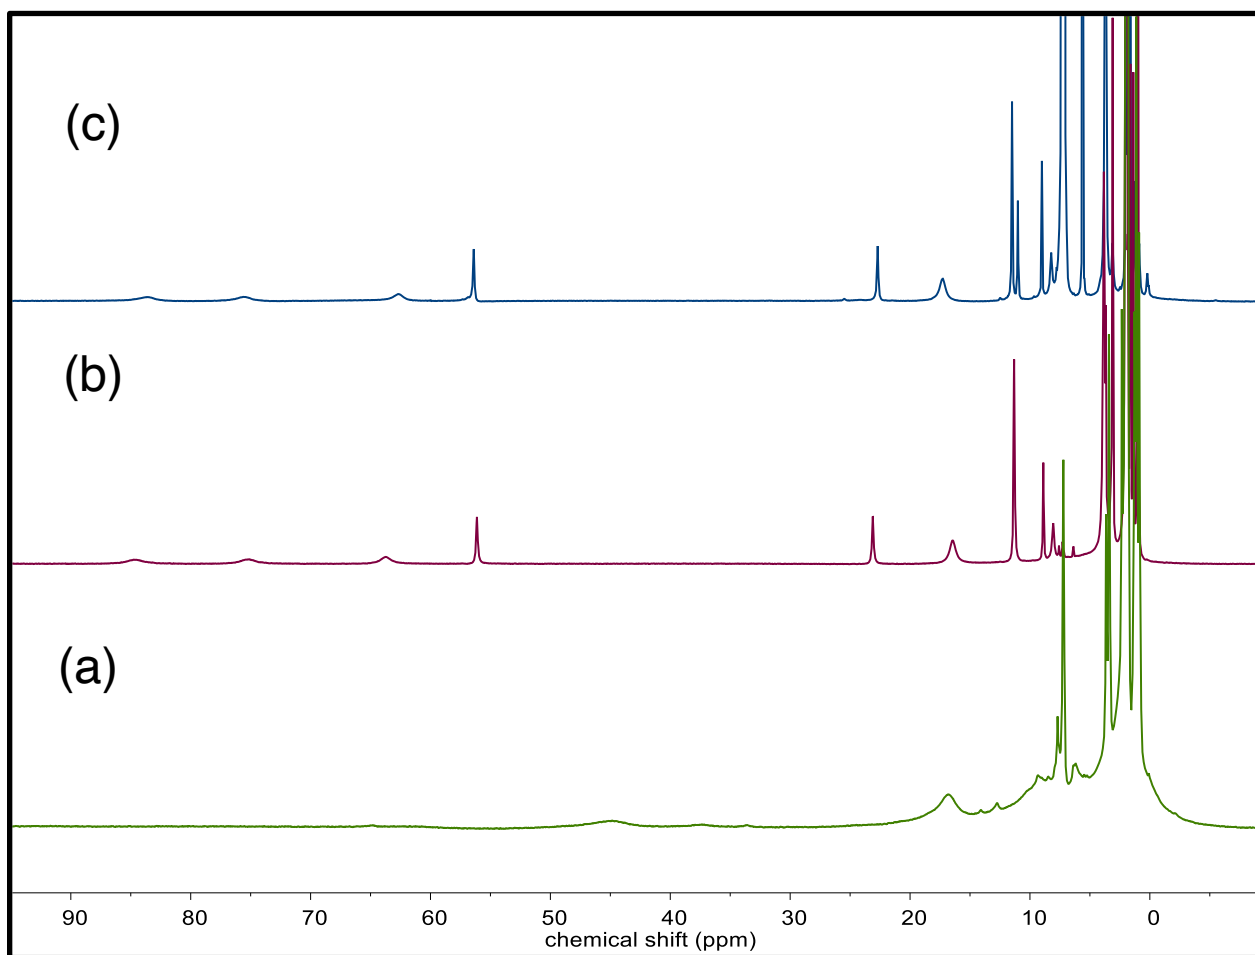

**Figure S13.**  $^1\text{H}$  NMR spectra ( $\text{CD}_3\text{CN}$ , 23  $^\circ\text{C}$ ) of (a) **7**, (b) **5** and (c) reaction of **7** with (*p*-OMe- $\text{C}_6\text{H}_4$ ) $_3\text{C}\cdot$  at -35  $^\circ\text{C}$ .

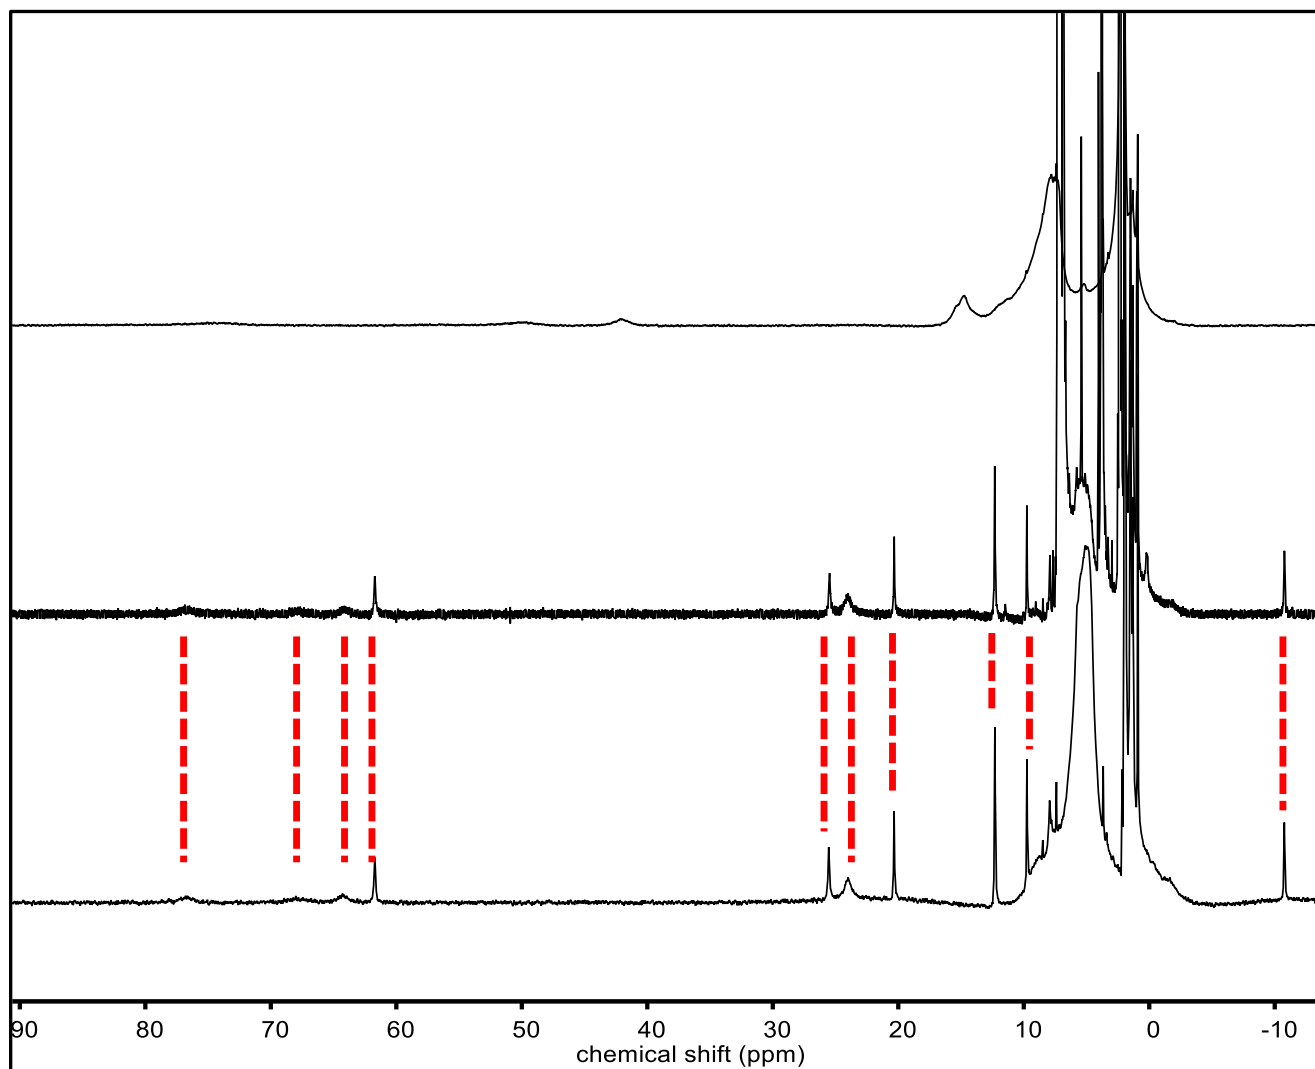

**Figure S14.** <sup>1</sup>H NMR spectra (CD<sub>3</sub>CN, 23 °C) of **4** (top), **2** (middle) and reaction of **4** with (*p*-OMe-C<sub>6</sub>H<sub>4</sub>)<sub>3</sub>C• at 23 °C (bottom).

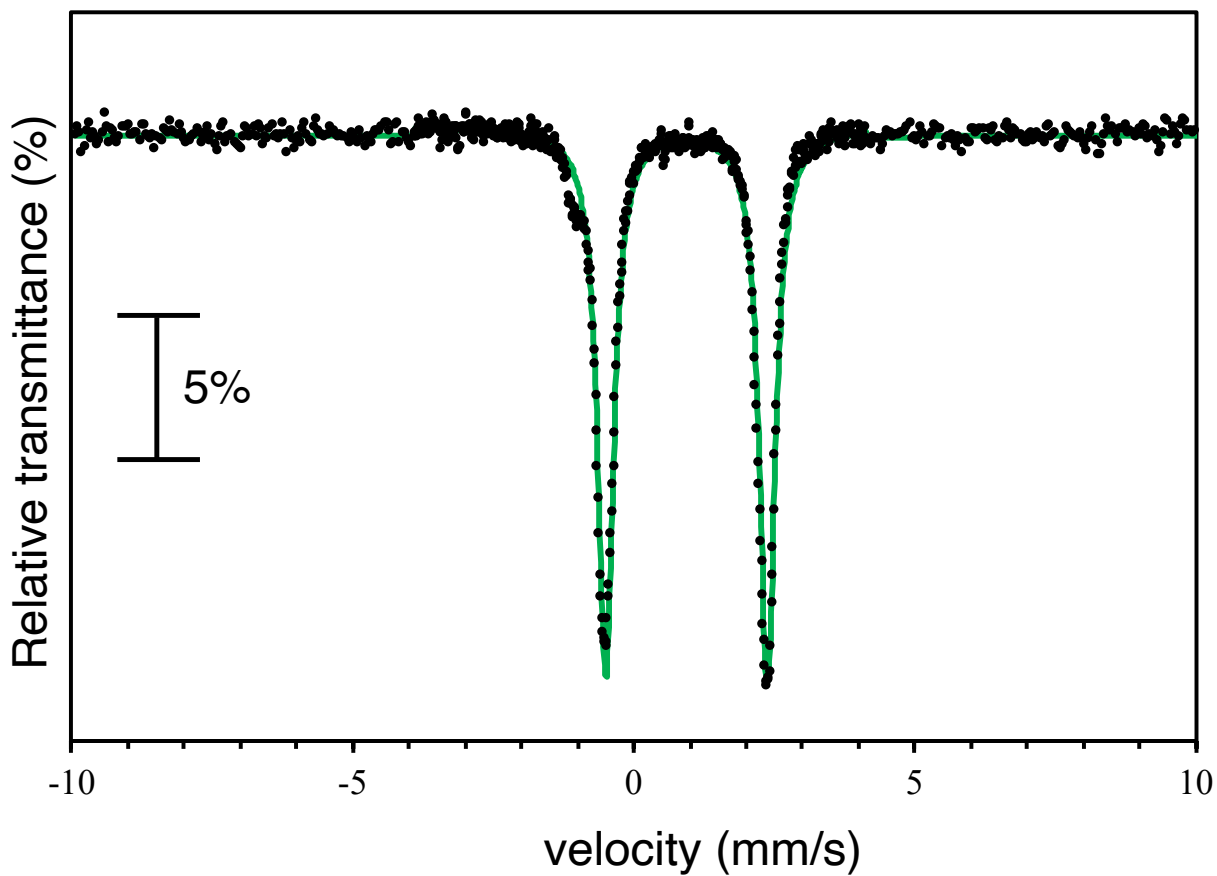

**Figure S15.** Zero-field  $^{57}\text{Fe}$  Mössbauer spectrum for  $^{57}\text{Fe}^{\text{II}}(\text{BNPA}^{\text{Ph}_2\text{O}})(\text{SPh}^{p\text{-NO}_2})$  (**1**) in frozen 2-MeTHF at 80 K. Experimental data = black circles, best fit = green line, with parameters  $\delta = 0.94$   $\text{mm s}^{-1}$  and  $|\Delta E_Q| = 2.87$   $\text{mm s}^{-1}$ ,  $\Gamma_R = \Gamma_L = 0.34$ .

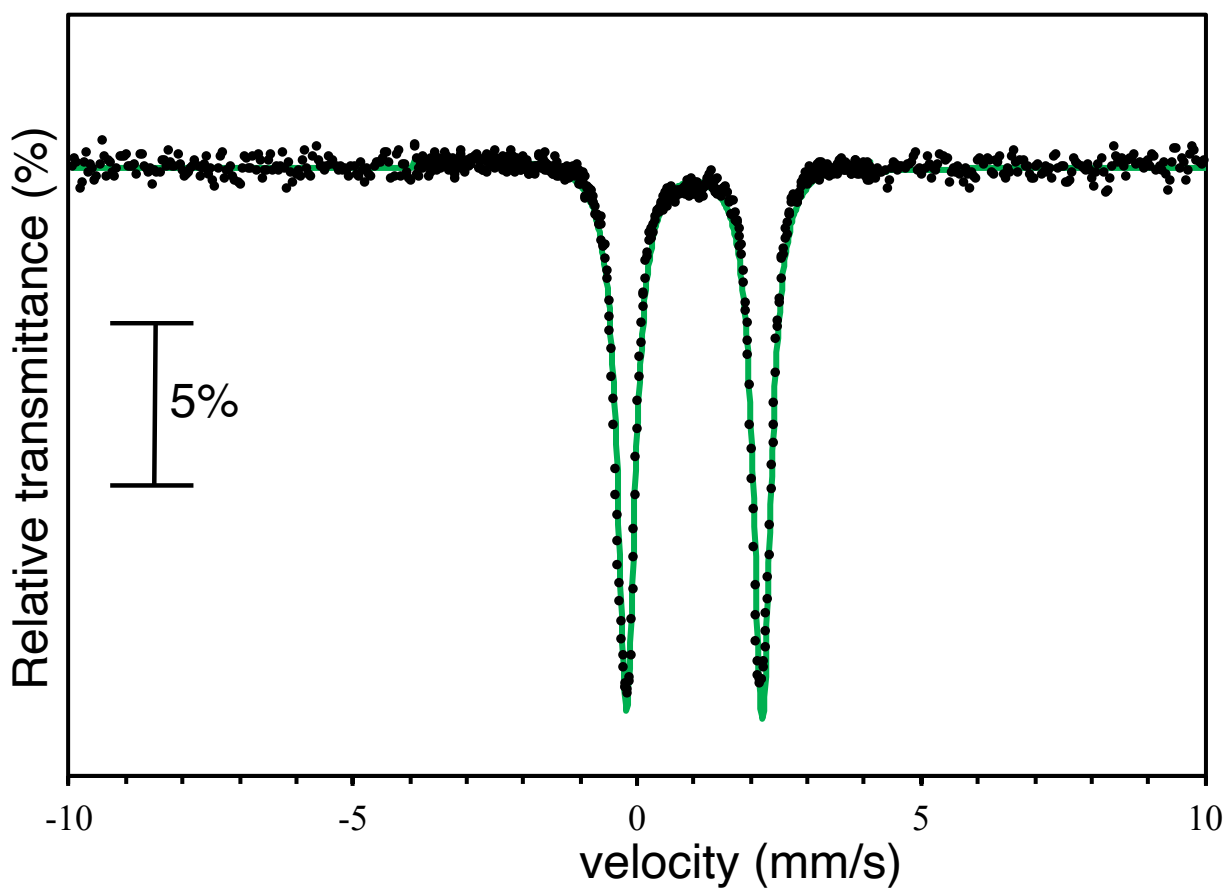

**Figure S16.** Zero-field  $^{57}\text{Fe}$  Mössbauer spectrum of  $^{57}\text{Fe}^{\text{II}}(\text{BNPA}^{\text{Ph}_2\text{O}})(\text{OPh}^{p\text{-NO}_2})$  (**2**) in 2-MeTHF at 80 K. Experimental data = black circles, best fit = green line, with parameters  $\delta = 1.03 \text{ mm s}^{-1}$  and  $|\Delta E_{\text{Q}}| = 2.76 \text{ mm s}^{-1}$ ,  $\Gamma_{\text{R}} = \Gamma_{\text{L}} = 0.28$ .



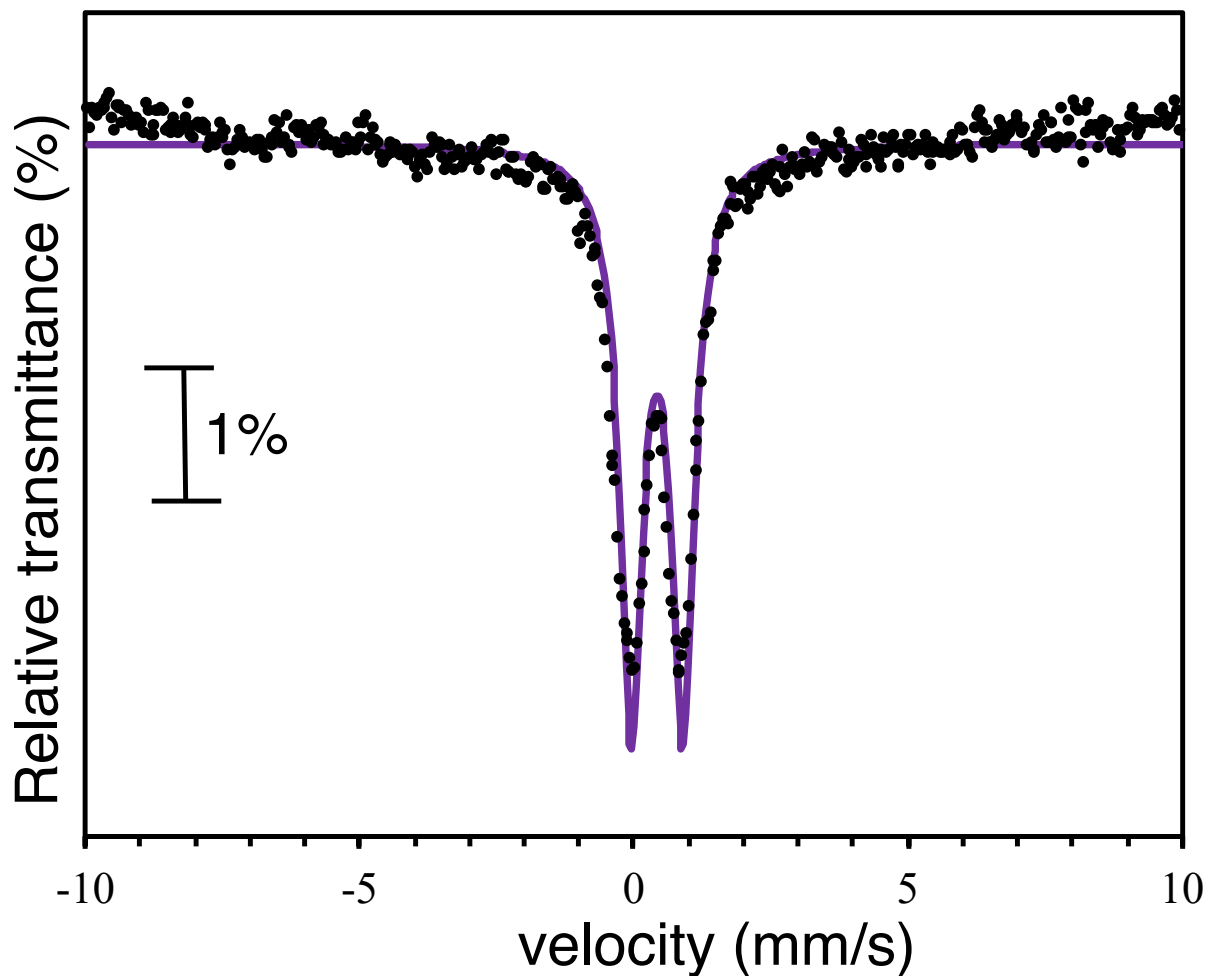

**Figure S17.** Zero-field  $^{57}\text{Fe}$  Mössbauer spectrum of  $^{57}\text{Fe}^{\text{III}}(\text{BNPA}^{\text{Ph}_2\text{O}})(\text{OH})(\text{SPh}^{\text{p-NO}_2})$  (**3**) as a solid film at 80 K. Experimental data = black circles, best fits = purple line, with parameters  $\delta = 0.42$   $\text{mm s}^{-1}$  and  $|\Delta E_{\text{Q}}| = 0.96$   $\text{mm s}^{-1}$ ,  $\Gamma_{\text{R}} = \Gamma_{\text{L}} = 0.67$ .

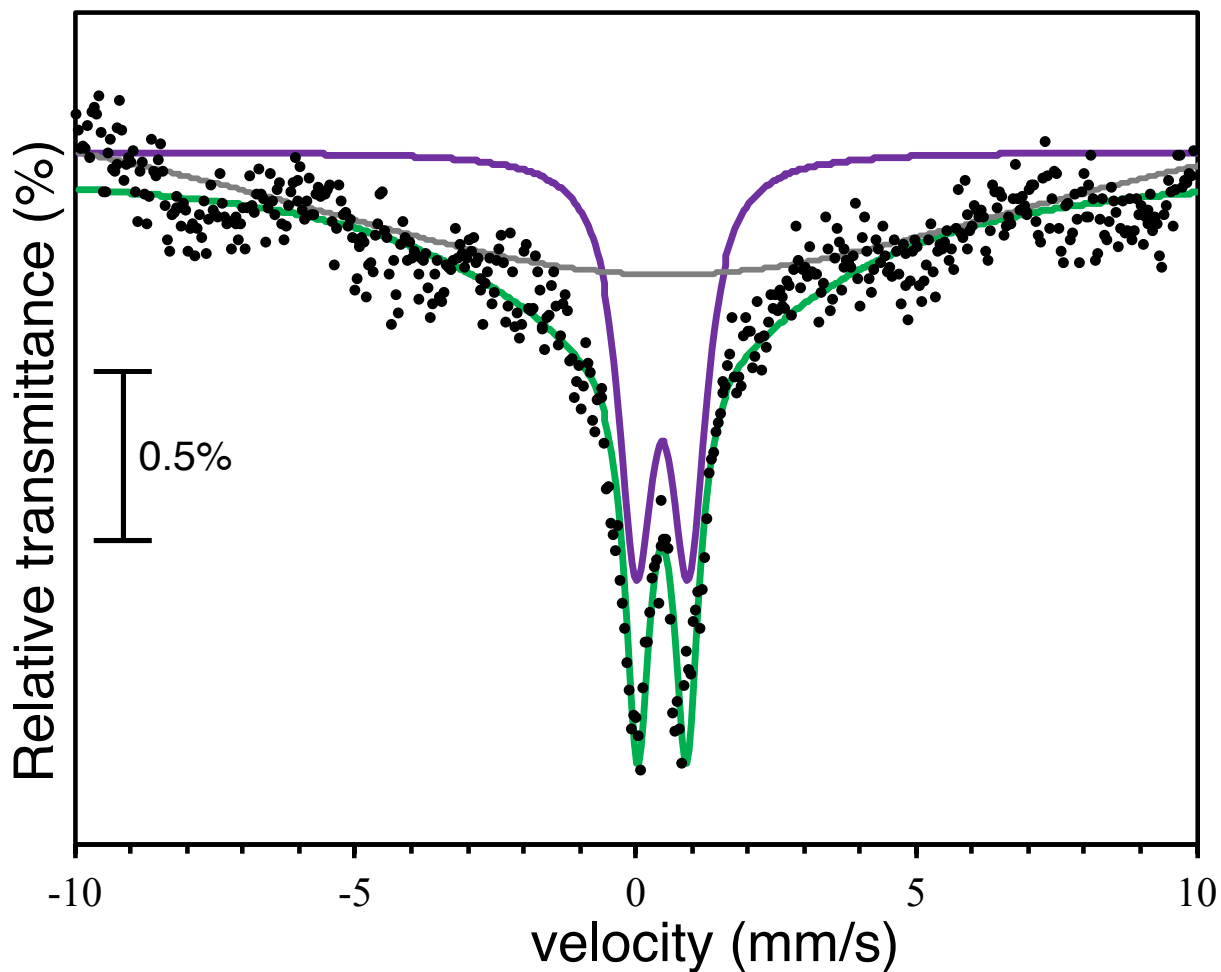

**Figure S18.** Zero-field  $^{57}\text{Fe}$  Mössbauer spectrum of  $^{57}\text{Fe}^{\text{III}}(\text{BNPA}^{\text{Ph}_2\text{O}})(\text{OH})(\text{OPh}^{p\text{-NO}_2})$  (**4**) as a solid film at 80 K. Experimental data = black circles, best fit = green line, with parameters: subcomponent 1 (purple line)  $\delta = 0.47 \text{ mm s}^{-1}$ ,  $|\Delta E_Q| = 0.94 \text{ mm s}^{-1}$ ,  $\Gamma_R = \Gamma_L = 0.71$ ; subcomponent 2 (grey line)  $\delta = 0.17 \text{ mm s}^{-1}$ ,  $|\Delta E_Q| = 0.59 \text{ mm s}^{-1}$ ,  $\Gamma_R = \Gamma_L = 15.5$ . Subcomponent 2 was added to account for the intermediate relaxation of the doublet at 80 K.

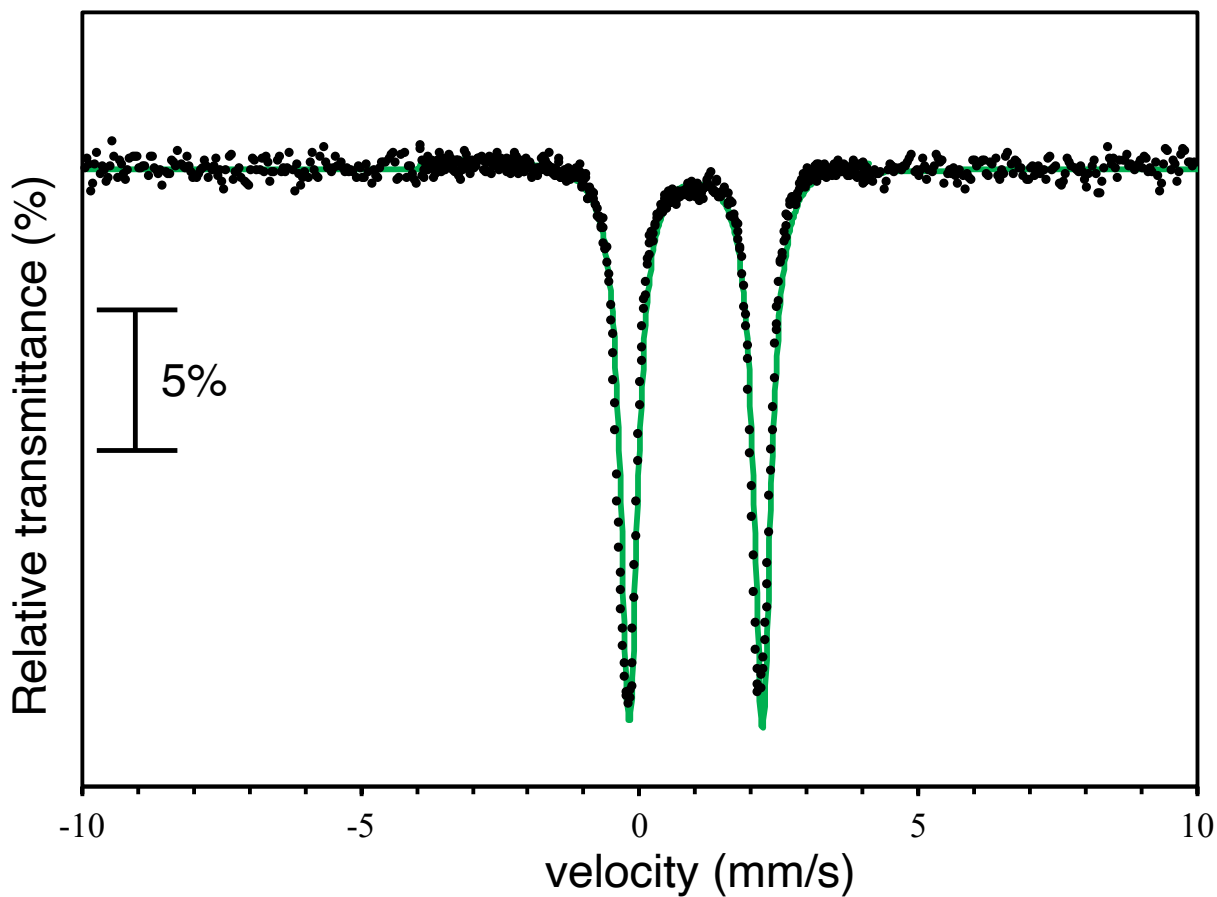

**Figure S19.** Zero-field  $^{57}\text{Fe}$  Mössbauer spectrum of  $^{57}\text{Fe}^{\text{II}}(\text{BNPA}^{\text{Ph}_2\text{O}})(\text{OH})$  (**5**) in 2-MeTHF at 80 K. Experimental data = black circles, best fit = green line, with parameters  $\delta = 1.01 \text{ mm s}^{-1}$ ,  $|\Delta E_Q| = 2.38 \text{ mm s}^{-1}$ ,  $\Gamma_R = \Gamma_L = 0.34$ .

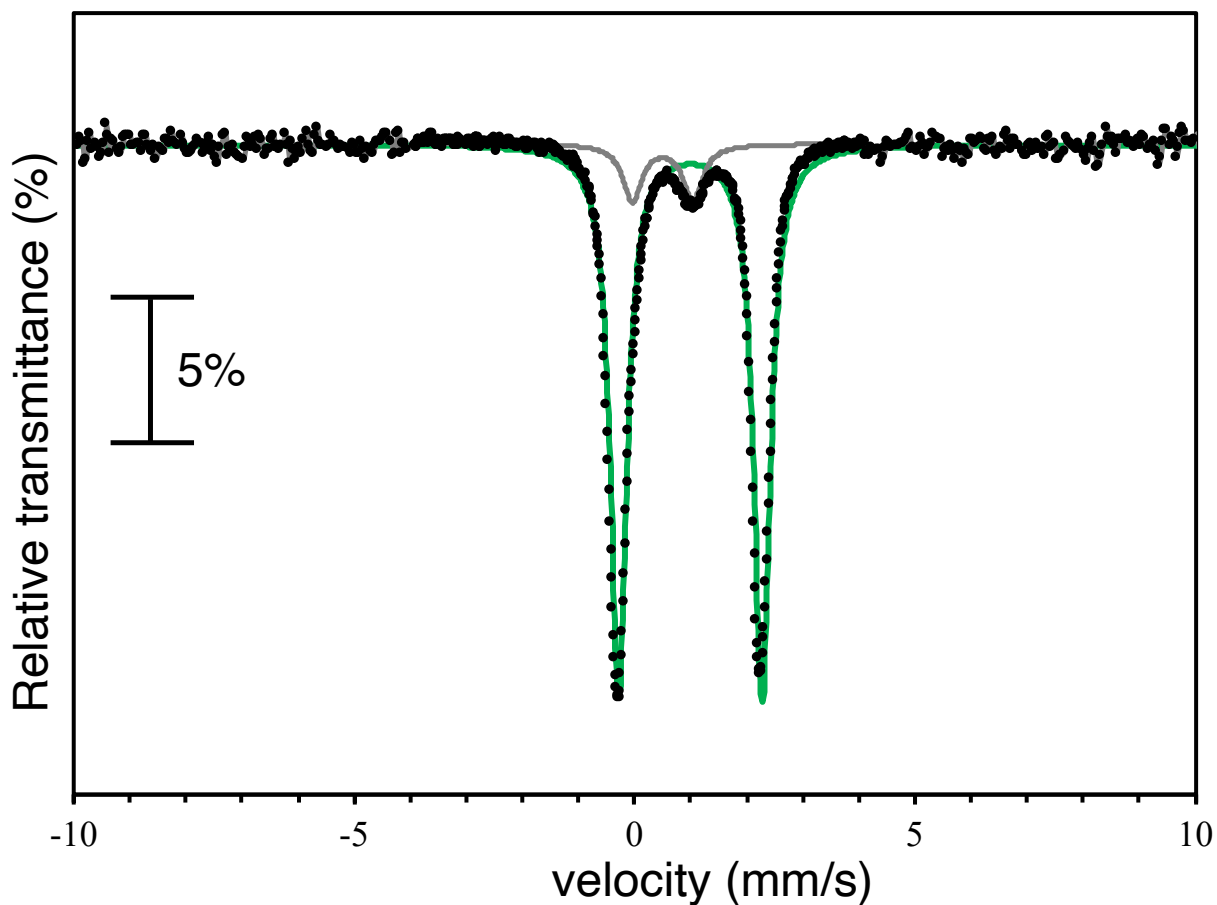

**Figure S20.** Zero-field  $^{57}\text{Fe}$  Mössbauer spectrum of  $^{57}\text{Fe}^{\text{II}}(\text{BNPA}^{\text{Ph}_2\text{O}})(\text{OH})\cdot\text{LiOTf}$  (**5•LiOTf**) in 2-MeTHF at 80 K. Experimental data = black circles, best fits with parameters: subsite 1 (green line)  $\delta = 1.00 \text{ mm s}^{-1}$ ,  $|\Delta E_Q| = 2.56 \text{ mm s}^{-1}$ ,  $\Gamma_R = \Gamma_L = 0.32$ , % area = 96; subsite 2 (grey line)  $\delta = 0.47 \text{ mm s}^{-1}$ ,  $|\Delta E_Q| = 0.83 \text{ mm s}^{-1}$ ,  $\Gamma_R = \Gamma_L = 0.59$ , % area = 04.

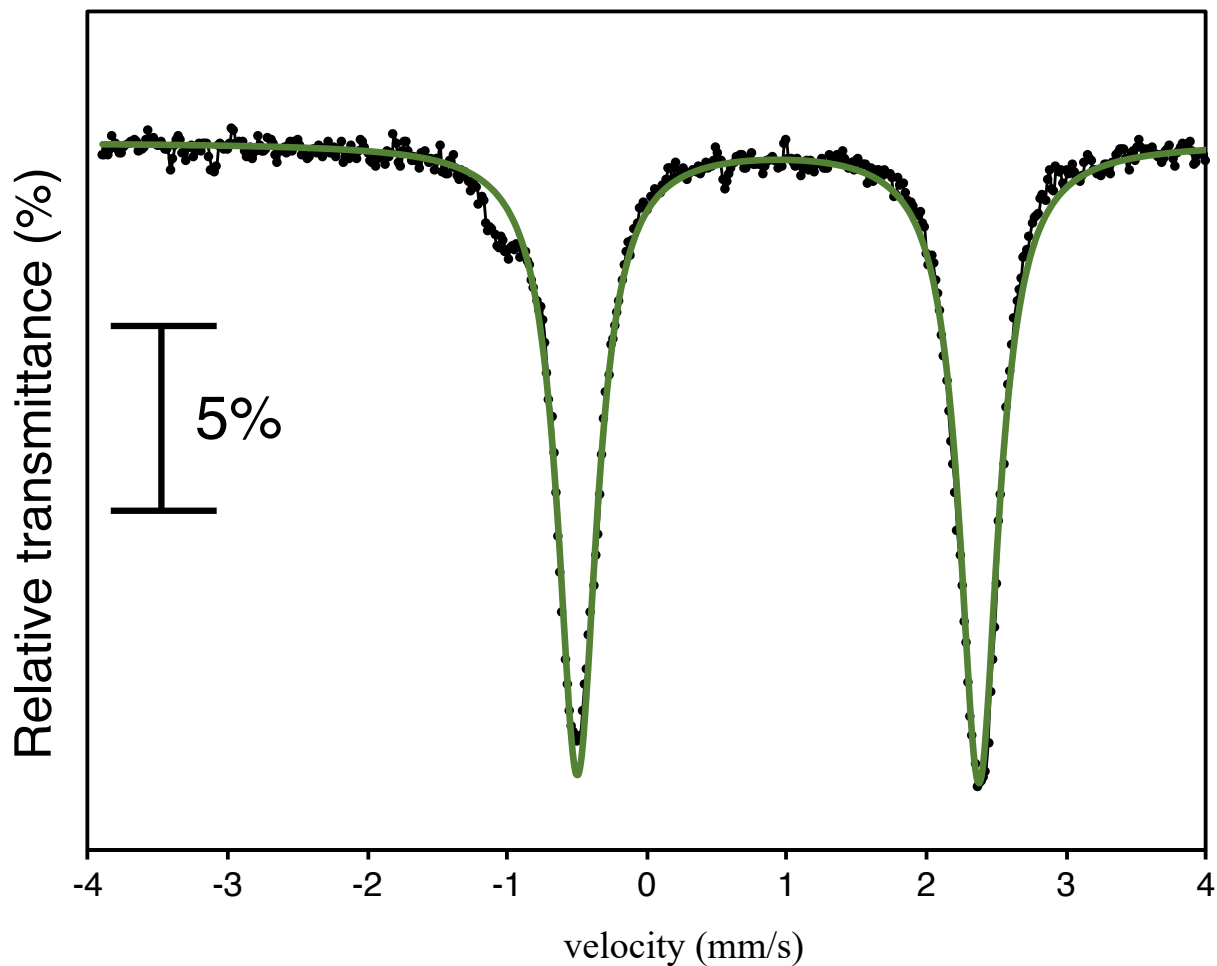

**Figure S21.** Zero-field  $^{57}\text{Fe}$  Mössbauer spectrum of  $^{57}\text{Fe}^{\text{II}}(\text{BNPA}^{\text{Ph}_2\text{O}})(\text{SPh}^{p\text{-CF}_3})$  (**6**) in 2-MeTHF at 80 K. Experimental data = black circles, best fit = green line, with parameters  $\delta = 0.94 \text{ mm s}^{-1}$  and  $|\Delta E_Q| = 2.87 \text{ mm s}^{-1}$ ,  $\Gamma_R = \Gamma_L = 0.34$ .

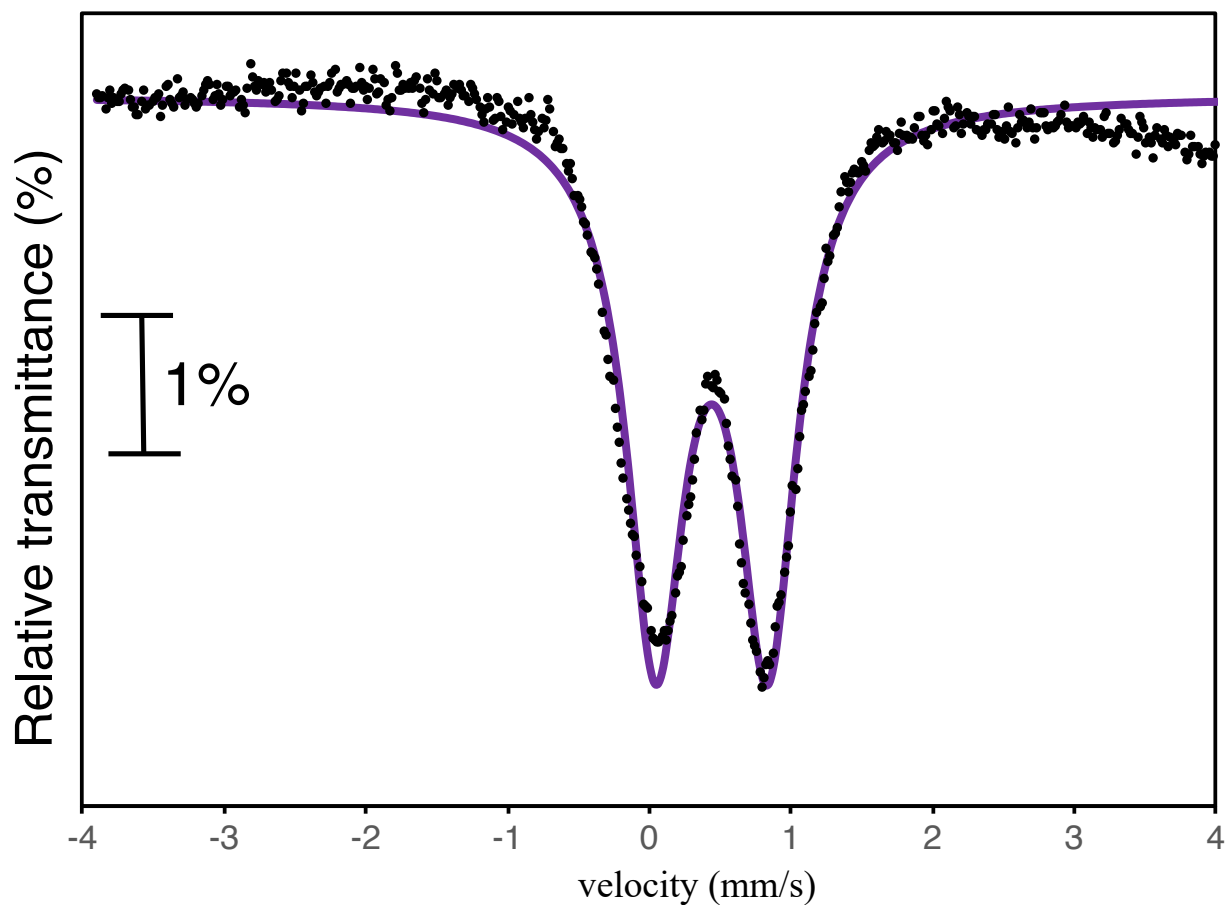

**Figure S22.** Zero field  $^{57}\text{Fe}$  Mössbauer spectrum of  $^{57}\text{Fe}^{\text{III}}(\text{BNPA}^{\text{Ph}_2\text{O}})(\text{OH})(\text{SPh}^{\text{p-CF}_3})$  (**7**) as a solid film at 80 K. Experimental data = black circles, best fit = solid purple line, with parameters  $\delta = 0.47 \text{ mm s}^{-1}$  and  $|\Delta E_{\text{Q}}| = 0.84 \text{ mm s}^{-1}$ ,  $\Gamma_{\text{R}} = \Gamma_{\text{L}} = 0.59$ .

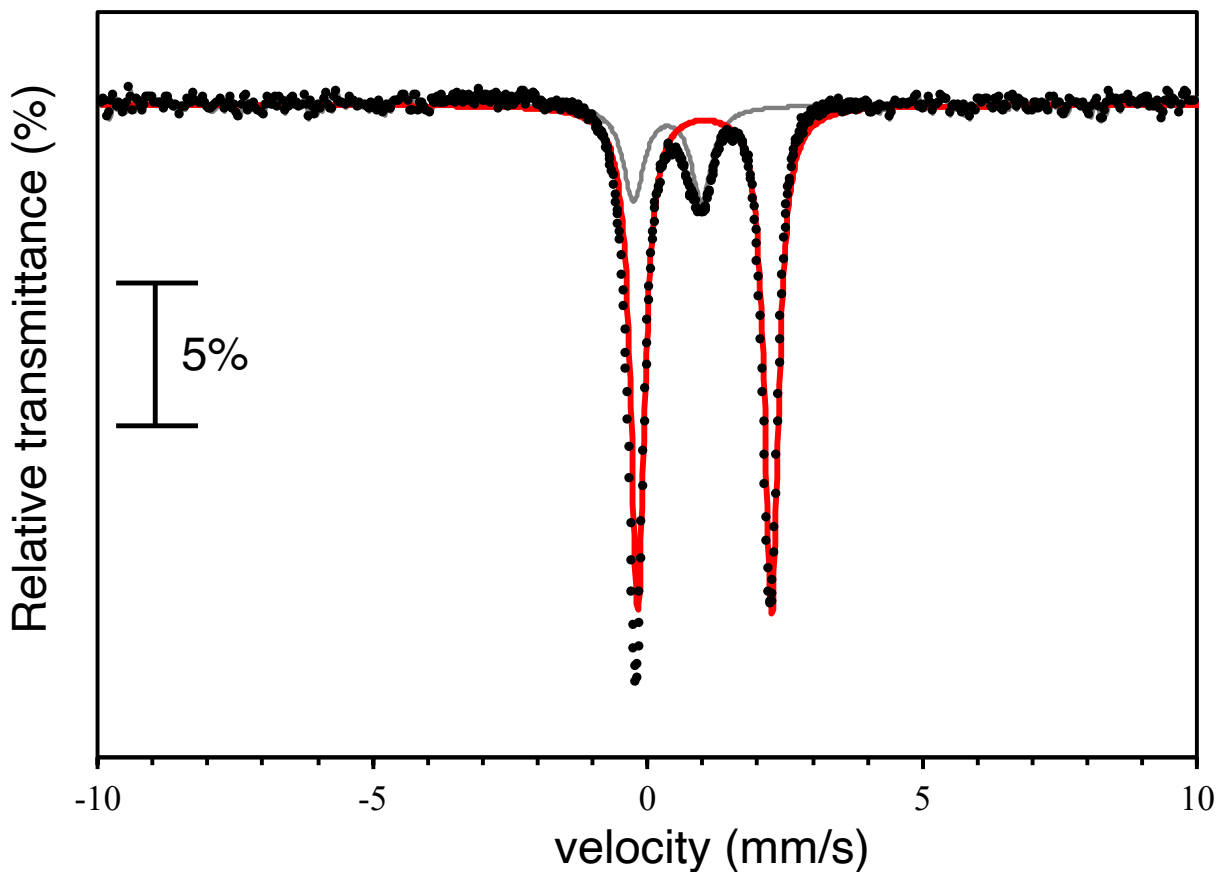

**Figure S23.** Zero-field  $^{57}\text{Fe}$  Mössbauer spectrum (2-MeTHF, 80 K) of the reaction mixture for  $^{57}\text{Fe}^{\text{III}}(\text{BNPA}^{\text{Ph}_2\text{O}})(\text{OH})(\text{SPh}^{p\text{-NO}_2})$  (**3**) and  $(p\text{-OMe-C}_6\text{H}_4)_3\text{C}^\bullet$  (1 equiv) over 1 h at  $-35^\circ\text{C}$  in THF/toluene. Experimental data = black circles, best fits with parameters: subsite 1 (red line)  $\delta = 1.00 \text{ mm s}^{-1}$ ,  $|\Delta E_Q| = 2.37 \text{ mm s}^{-1}$ ,  $\Gamma_R = \Gamma_L = 0.34$ , % area = 88; subsite 2 (grey line)  $\delta = 0.45 \text{ mm s}^{-1}$ ,  $|\Delta E_Q| = 0.91 \text{ mm s}^{-1}$ ,  $\Gamma_R = \Gamma_L = 0.52$ , % area = 12.

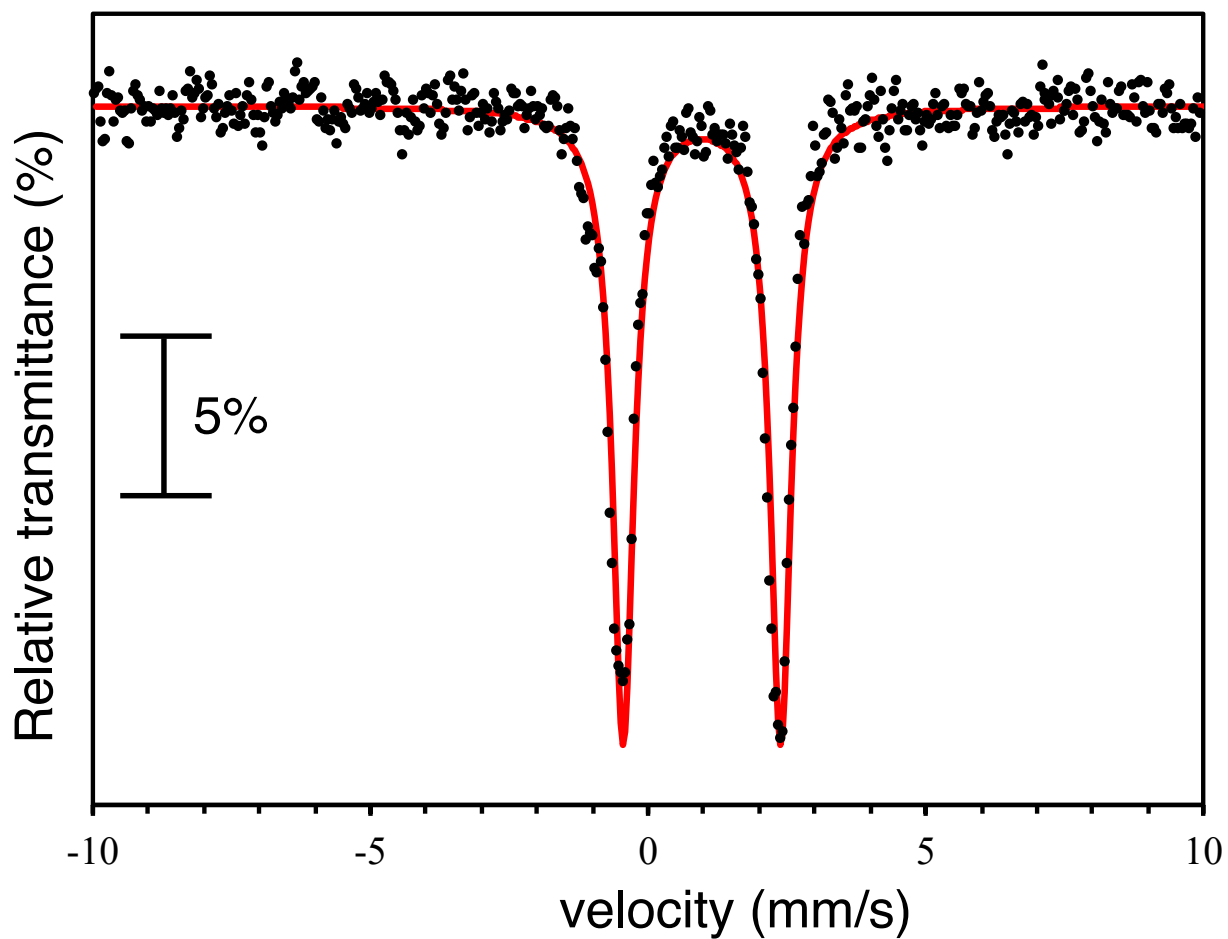

**Figure S24.** Zero-field  $^{57}\text{Fe}$  Mössbauer spectrum (2-MeTHF, 80 K) of the reaction mixture for  $^{57}\text{Fe}^{\text{III}}(\text{BNPA}^{\text{Ph}_2\text{O}})(\text{OH})(\text{SPh}^{p\text{-NO}_2})$  (**3**) and  $(p\text{-OMe-C}_6\text{H}_4)_3\text{C}\cdot$  (1 equiv) at 23 °C over 30 min in THF/toluene. Experimental data = black circles, best fit = red line, with parameters:  $\delta = 0.96 \text{ mm s}^{-1}$ ,  $|\Delta E_Q| = 2.83 \text{ mm s}^{-1}$ ,  $\Gamma_R = \Gamma_L = 0.37$ .



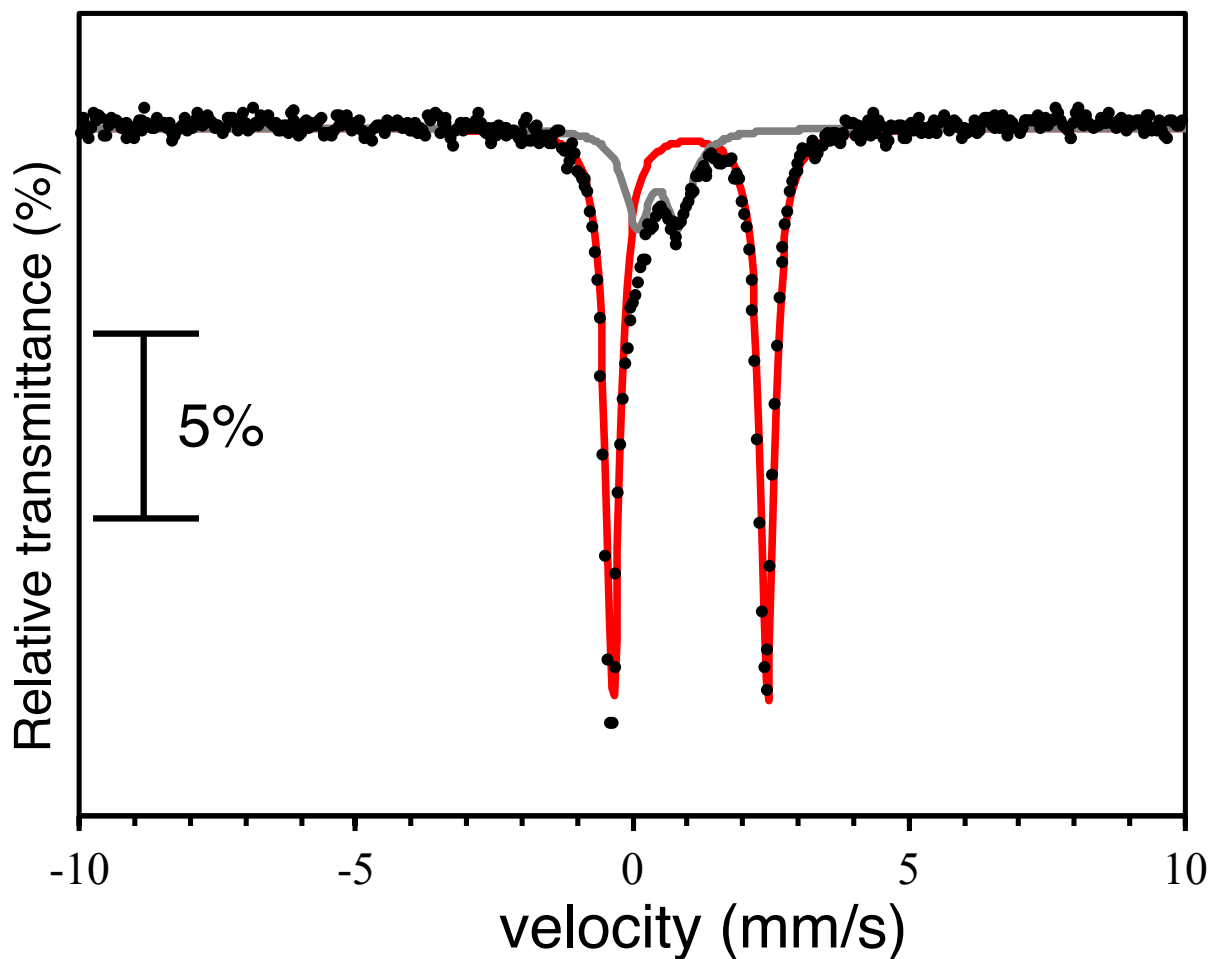

**Figure S25.** Zero-field  $^{57}\text{Fe}$  Mössbauer spectrum (2-MeTHF, 80 K) of the reaction  $^{57}\text{Fe}^{\text{III}}(\text{BNPA}^{\text{Ph}_2\text{O}})(\text{OH})(\text{OPh}^{p\text{-NO}_2})$  (**4**) with  $(p\text{-OMe-C}_6\text{H}_4)_3\text{C}\cdot$  (1 equiv) at 23 °C over 30 min in THF/toluene. Experimental data = black circles, best fits = solid lines, with parameters: subsite 1 (red line)  $\delta = 1.04 \text{ mm s}^{-1}$  and  $|\Delta E_{\text{Q}}| = 2.79 \text{ mm s}^{-1}$ ,  $\Gamma_{\text{R}} = \Gamma_{\text{L}} = 0.30$ , % area = 90; subsite 2 (grey line)  $\delta = 0.39 \text{ mm s}^{-1}$  and  $|\Delta E_{\text{Q}}| = 0.82 \text{ mm s}^{-1}$ ,  $\Gamma_{\text{R}} = \Gamma_{\text{L}} = 0.47$ , % area = 10.

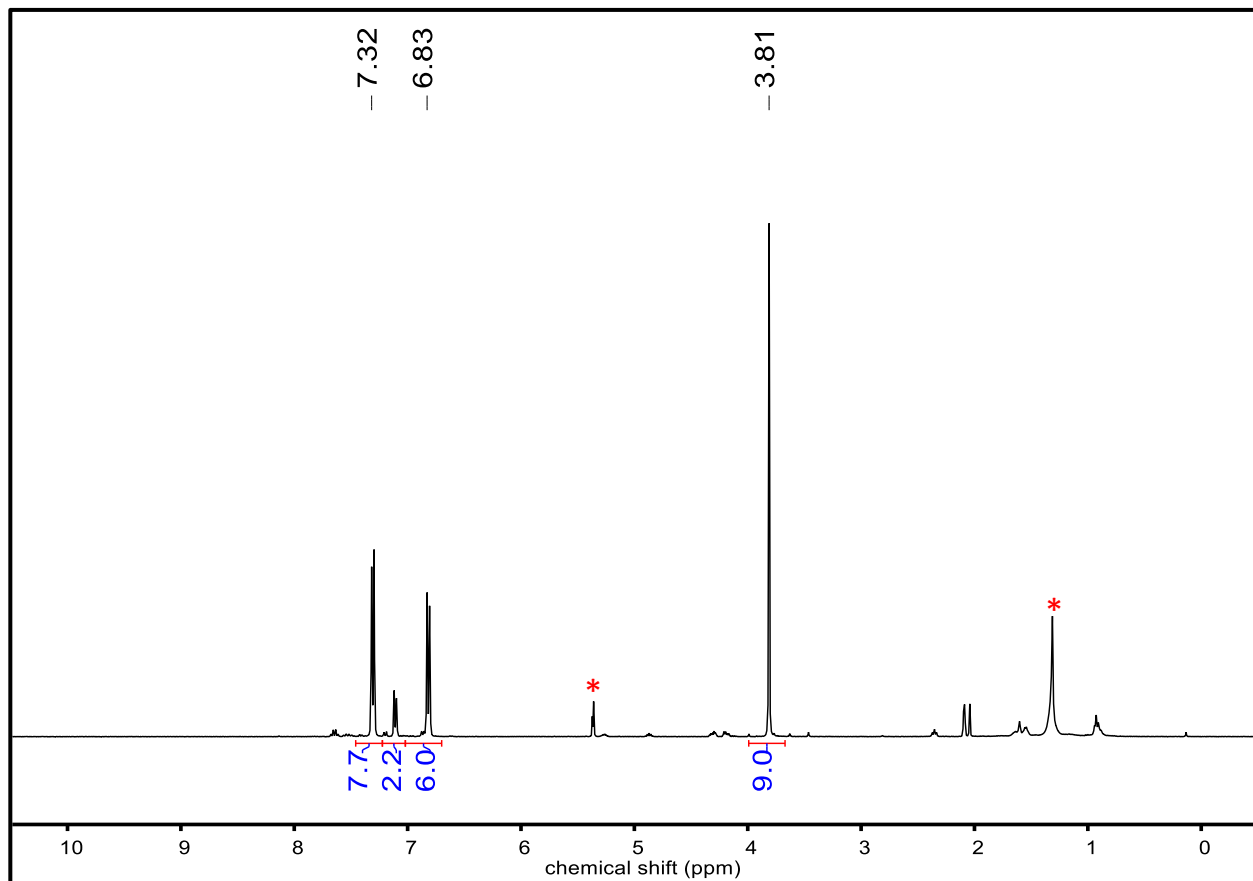

**Figure S26.** <sup>1</sup>H NMR spectrum (298 K) of authentic (*p*-OMe-C<sub>6</sub>H<sub>4</sub>)<sub>3</sub>CSPhp<sup>*p*</sup>-CF<sub>3</sub> in CD<sub>2</sub>Cl<sub>2</sub>. Residual solvents are marked with an asterisk (\*).

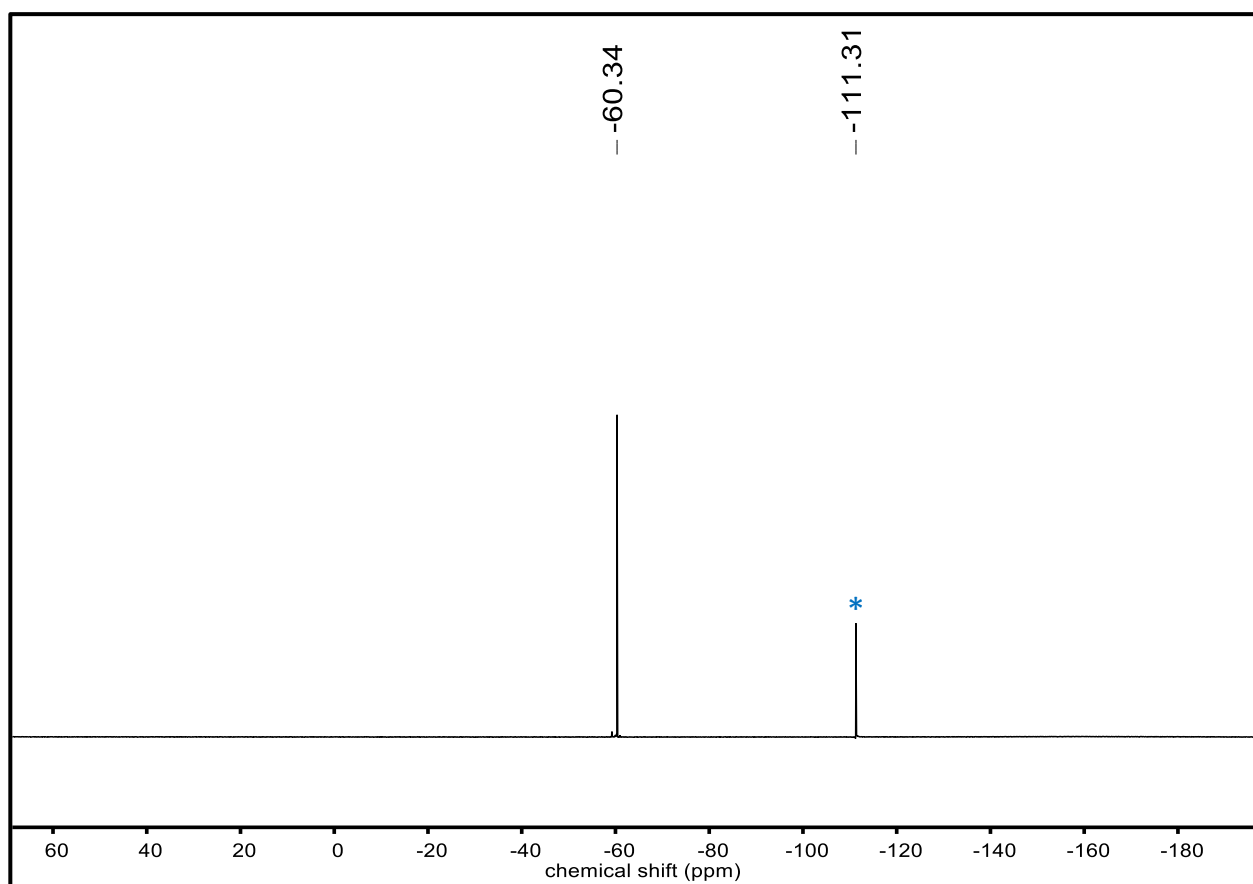

**Figure S27.**  $^{19}\text{F}$  NMR spectrum (298 K) of authentic  $(p\text{-OMe-C}_6\text{H}_4)_3\text{CSPh}^{p\text{-CF}_3}$  in  $\text{CD}_2\text{Cl}_2$ . Reference fluorobenzene standard is marked with an asterisk (\*).

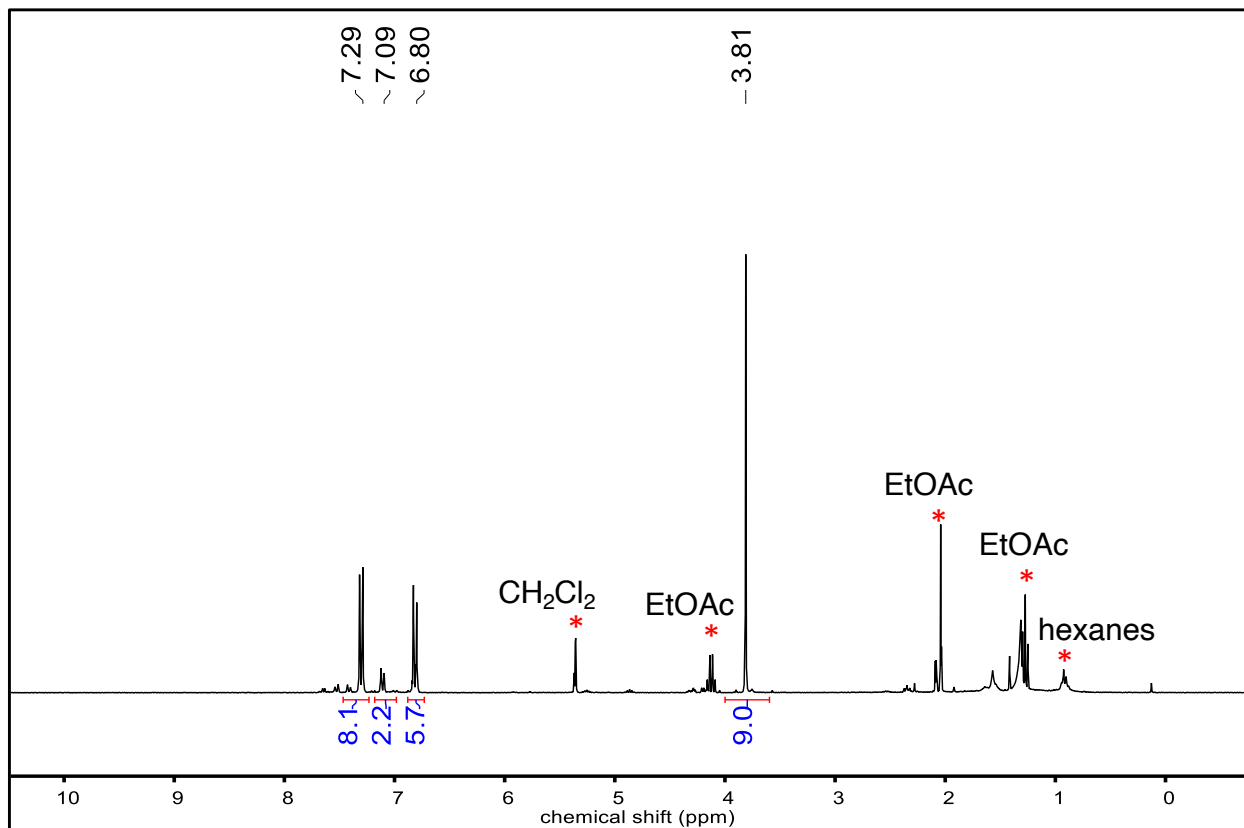

**Figure S28.** <sup>1</sup>H NMR (298 K) spectrum of isolated (*p*-OMe-C<sub>6</sub>H<sub>4</sub>)<sub>3</sub>CSPh<sup>*p*</sup>-CF<sub>3</sub> from the reaction of **7** and (*p*-OMe-C<sub>6</sub>H<sub>4</sub>)<sub>3</sub>C• at -35 °C in CD<sub>2</sub>Cl<sub>2</sub>. Residual solvents are marked with an asterisk (\*).

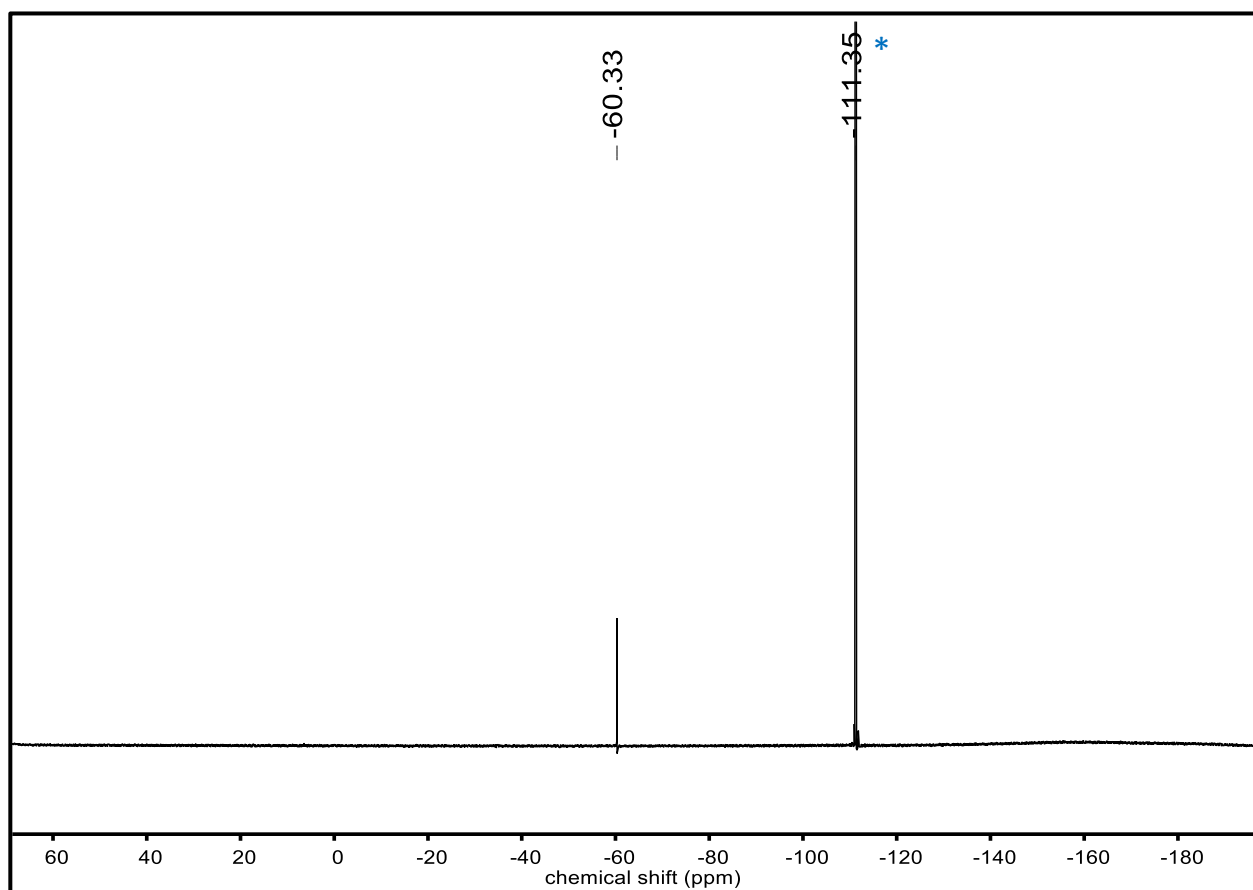

**Figure S29.**  $^{19}\text{F}$  NMR (298 K) spectrum of isolated  $(p\text{-OMe-C}_6\text{H}_4)_3\text{CSPh}^{p\text{-CF}_3}$  from the reaction of **7** and  $(p\text{-OMe-C}_6\text{H}_4)_3\text{C}\cdot$  at  $-35\text{ }^\circ\text{C}$  in  $\text{CD}_2\text{Cl}_2$ . Reference fluorobenzene standard is marked with an asterisk (\*).

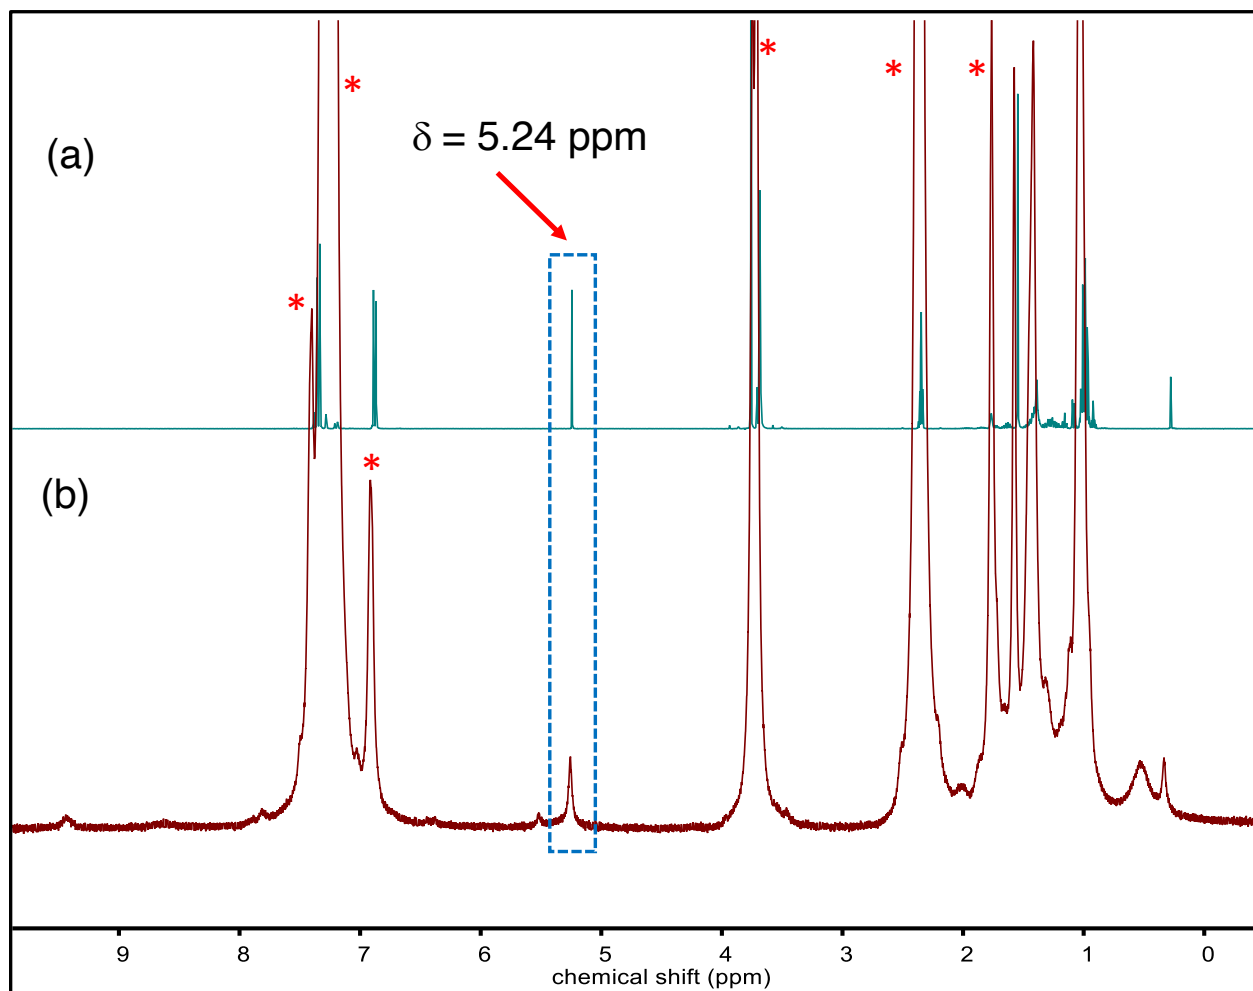

**Figure S30.**  $^1\text{H}$  NMR spectra (298 K) of (a) authentic  $(p\text{-OMe-C}_6\text{H}_4)_3\text{COH}$  and (b)  $(p\text{-OMe-C}_6\text{H}_4)_3\text{COH}$  formed in the reaction of **3** and  $(p\text{-OMe-C}_6\text{H}_4)_3\text{C}\cdot$  in  $\text{THF-}d_8/\text{toluene-}d_8$  (5/1 v/v) at 23 °C. The peak at  $\delta$  5.24 ppm corresponds to the -OH peak of  $(p\text{-OMe-C}_6\text{H}_4)_3\text{COH}$ . Residual solvents and triarylmethyl impurity peaks are marked with a red asterisk (\*).

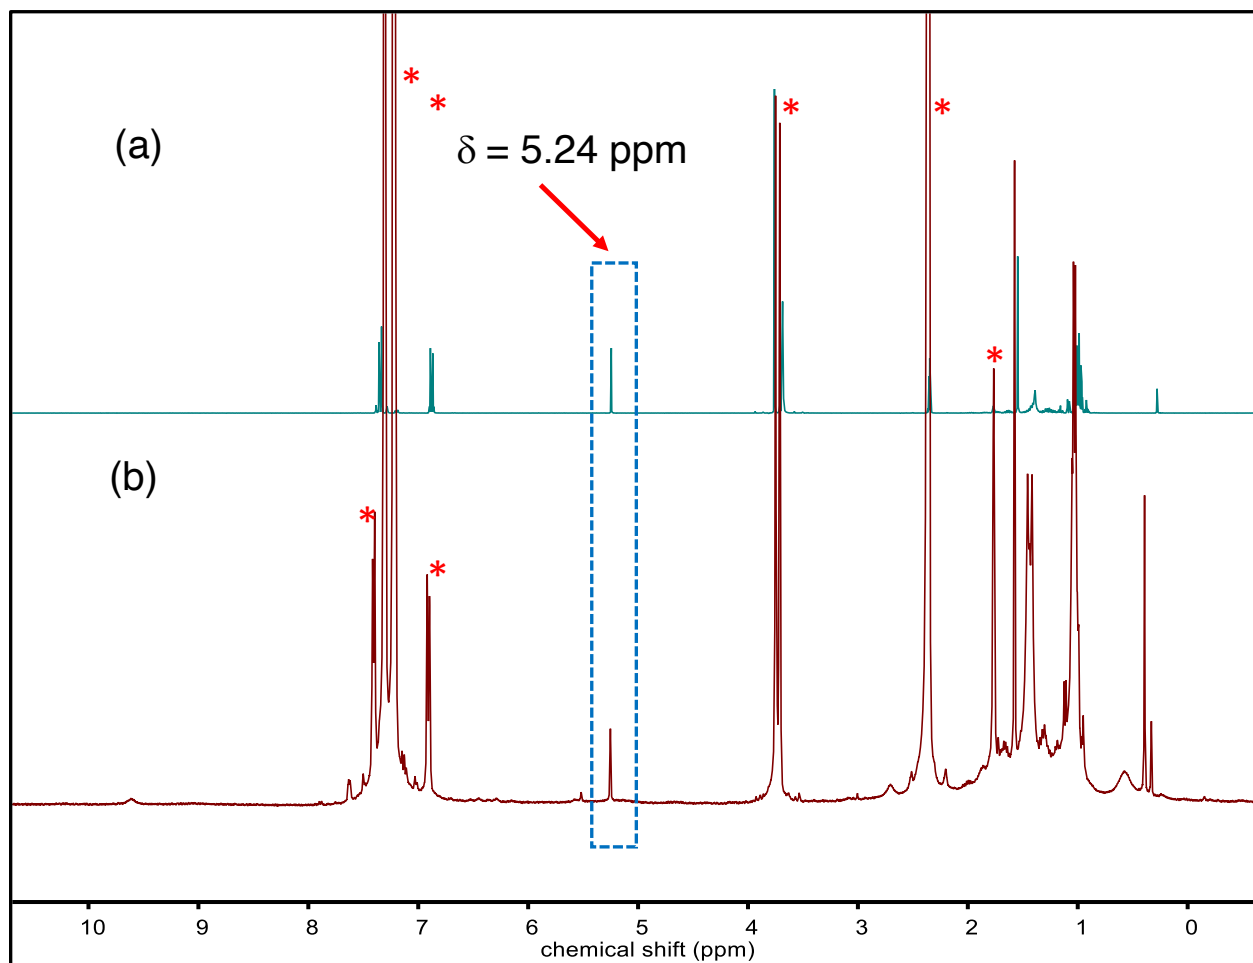

**Figure S31.**  $^1\text{H}$  NMR spectra (298 K) of (a) authentic  $(p\text{-OMe-C}_6\text{H}_4)_3\text{COH}$  and (b)  $(p\text{-OMe-C}_6\text{H}_4)_3\text{COH}$  formed in the reaction of **4** and  $(p\text{-OMe-C}_6\text{H}_4)_3\text{C}\cdot$  in  $\text{THF-}d_8/\text{toluene-}d_8$  (5/1 v/v) at 23 °C. The peak at  $\delta$  5.24 ppm corresponds to the  $-\text{OH}$  peak of  $(p\text{-OMe-C}_6\text{H}_4)_3\text{COH}$ . The peak at  $\delta$  5.24 ppm corresponds to the  $-\text{OH}$  peak of  $(p\text{-OMe-C}_6\text{H}_4)_3\text{COH}$ . Residual solvents and triarylmethyl impurity peaks are marked with a red asterisk (\*)

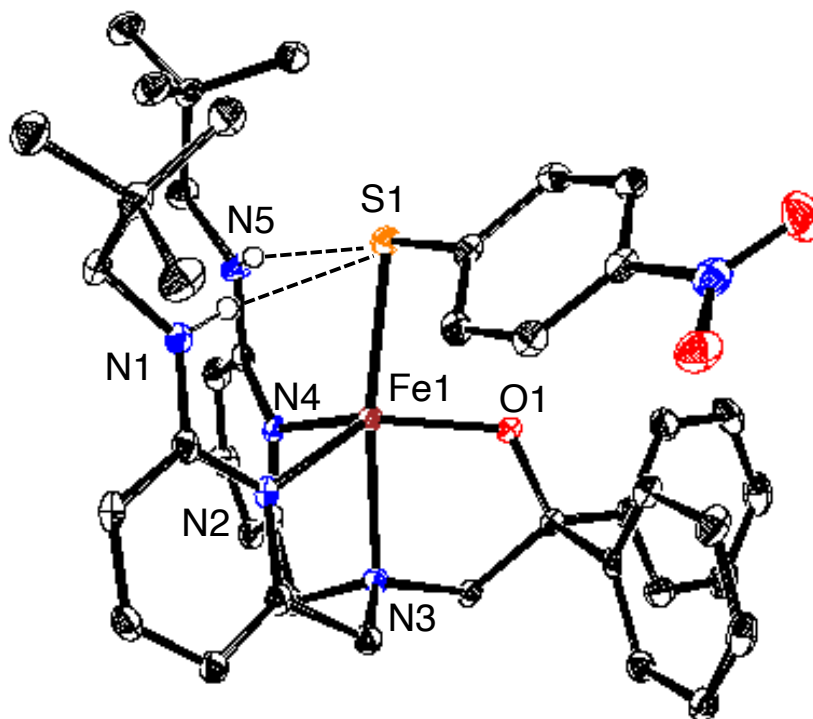

**Figure S32.** Displacement ellipsoid plot (50% probability) of  $\text{Fe}^{\text{II}}(\text{BNPA}^{\text{Ph}_2\text{O}})(\text{SPh}^{p\text{-NO}_2})$  (**1**) at 110(2) K. H-atoms are removed for clarity, except those attached to N1 and N5. Only one of the two crystallographically independent molecules is depicted.



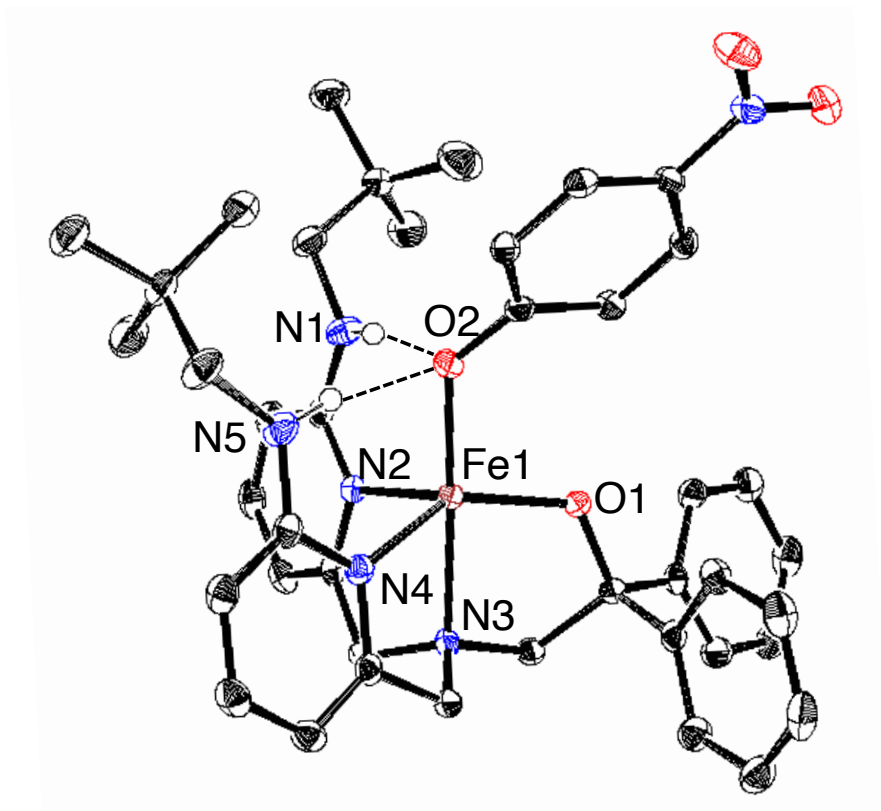

**Figure S33.** Displacement ellipsoid plot (50% probability) of  $\text{Fe}^{\text{II}}(\text{BNPA}^{\text{Ph}_2\text{O}})(\text{OPh}^{p\text{-NO}_2})$  (**2**) at 110(2) K. H-atoms are removed for clarity, except those attached to N1 and N5.

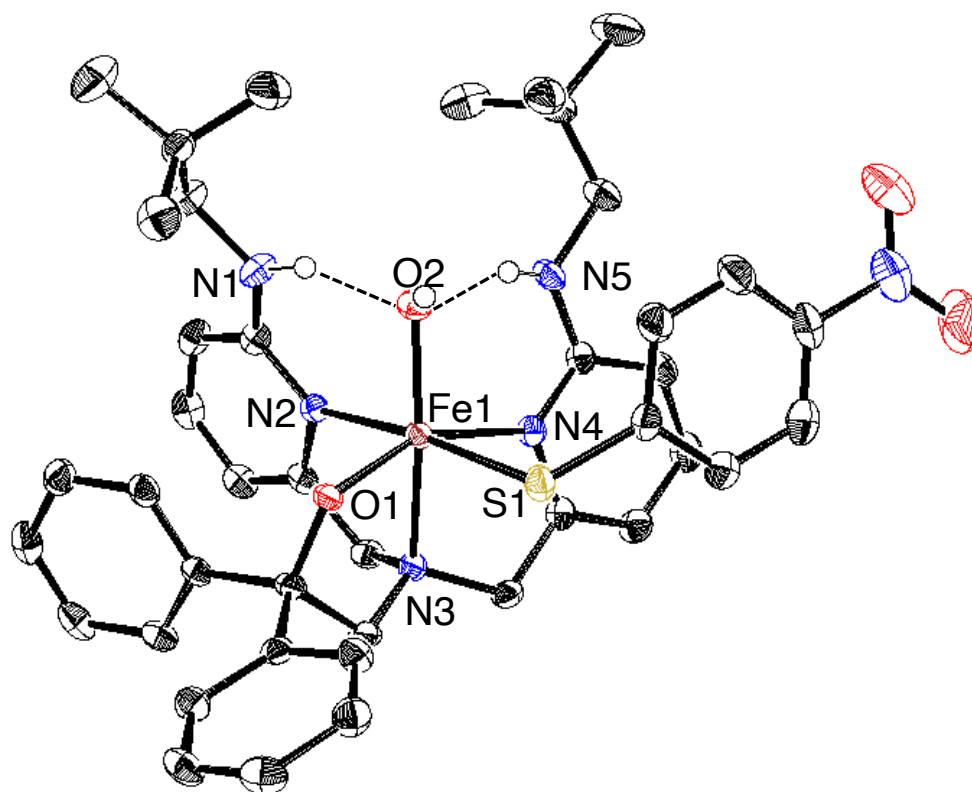

**Figure S34.** Displacement ellipsoid plot (50% probability) of  $\text{Fe}^{\text{III}}(\text{BNPA}^{\text{Ph}_2\text{O}})(\text{OH})(\text{SPh}^{p\text{-NO}_2})$  (**3**) at 110(2) K. H-atoms are removed for clarity, except those attached to N1, N5 and O2.

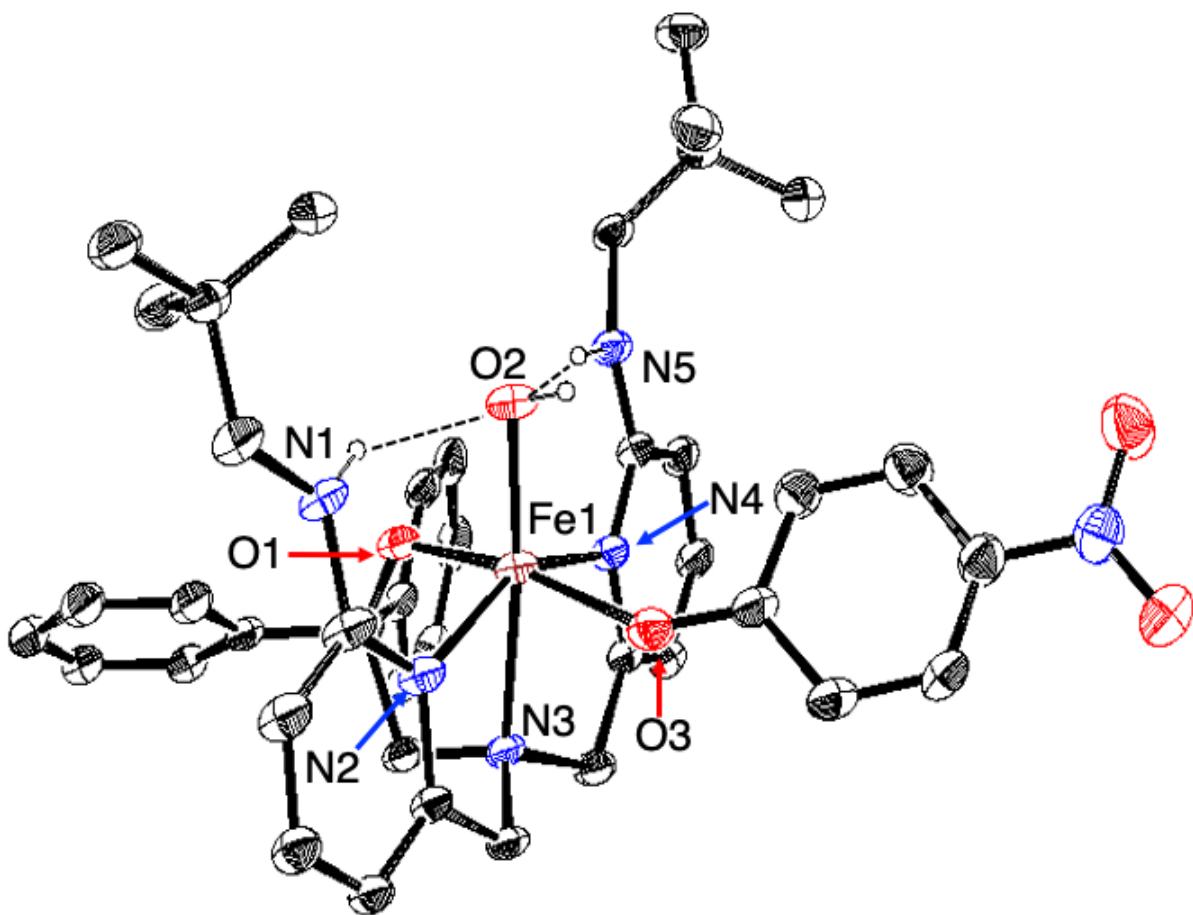

**Figure S35.** Displacement ellipsoid plot (50% probability) of  $\text{Fe}^{\text{III}}(\text{BNPA}^{\text{Ph}_2\text{O}})(\text{OH})(\text{OPh}^{\text{p-NO}_2})$  (**4**) at 100(2) K. H-atoms are removed for clarity, except those attached to N1, N5 and O2.

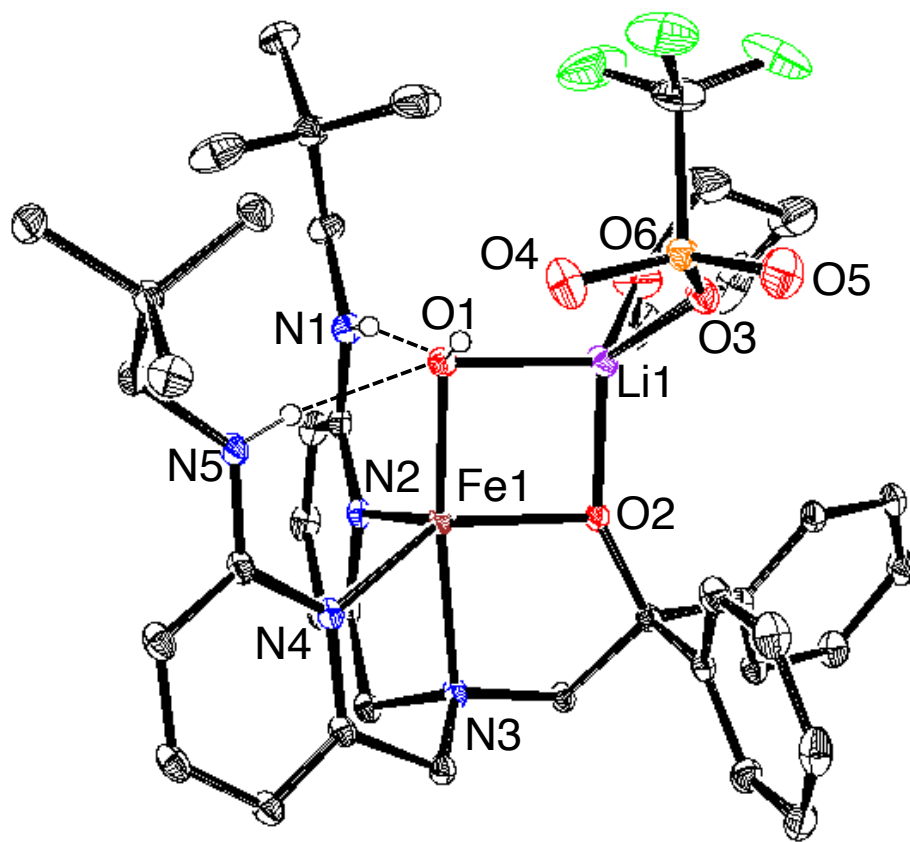

**Figure S36.** Displacement ellipsoid plot (50% probability) of  $\text{Fe}^{\text{II}}(\text{BNPA}^{\text{Ph}_2\text{O}})(\text{OH})(\text{Li}(\text{OTf})(\text{THF}))$  ( $5 \cdot \text{Li}(\text{OTf})(\text{THF})$ ) at 110(2) K. H-atoms are removed for clarity except those attached to N1, N5 and O2.

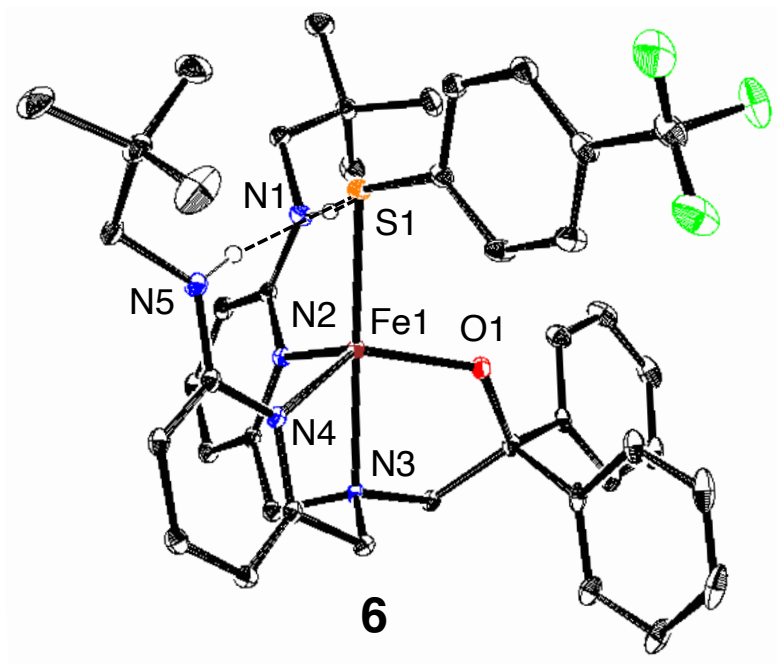

**Figure S37.** Displacement ellipsoid plot (50% probability) of  $\text{Fe}^{\text{II}}(\text{BNPA}^{\text{Ph}_2\text{O}})(\text{SPh}^{\text{p-CF}_3})$  (**6**) at 110(2) K. H-atoms are removed for clarity except those attached to N1, N5 and O2.

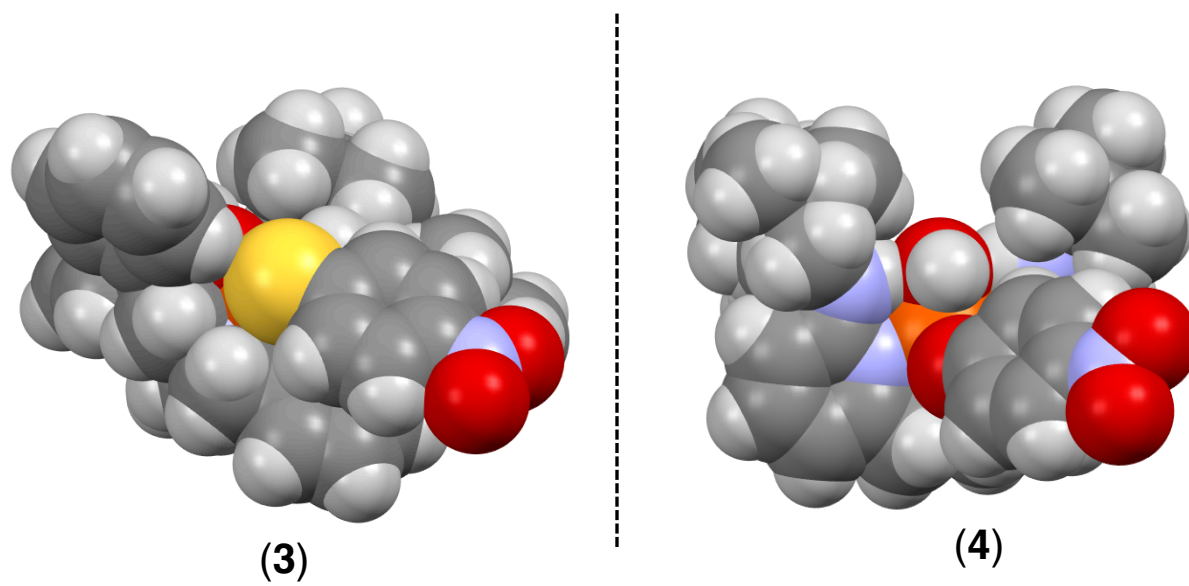

**Figure S38.** Space filling model of **3** and **4**.

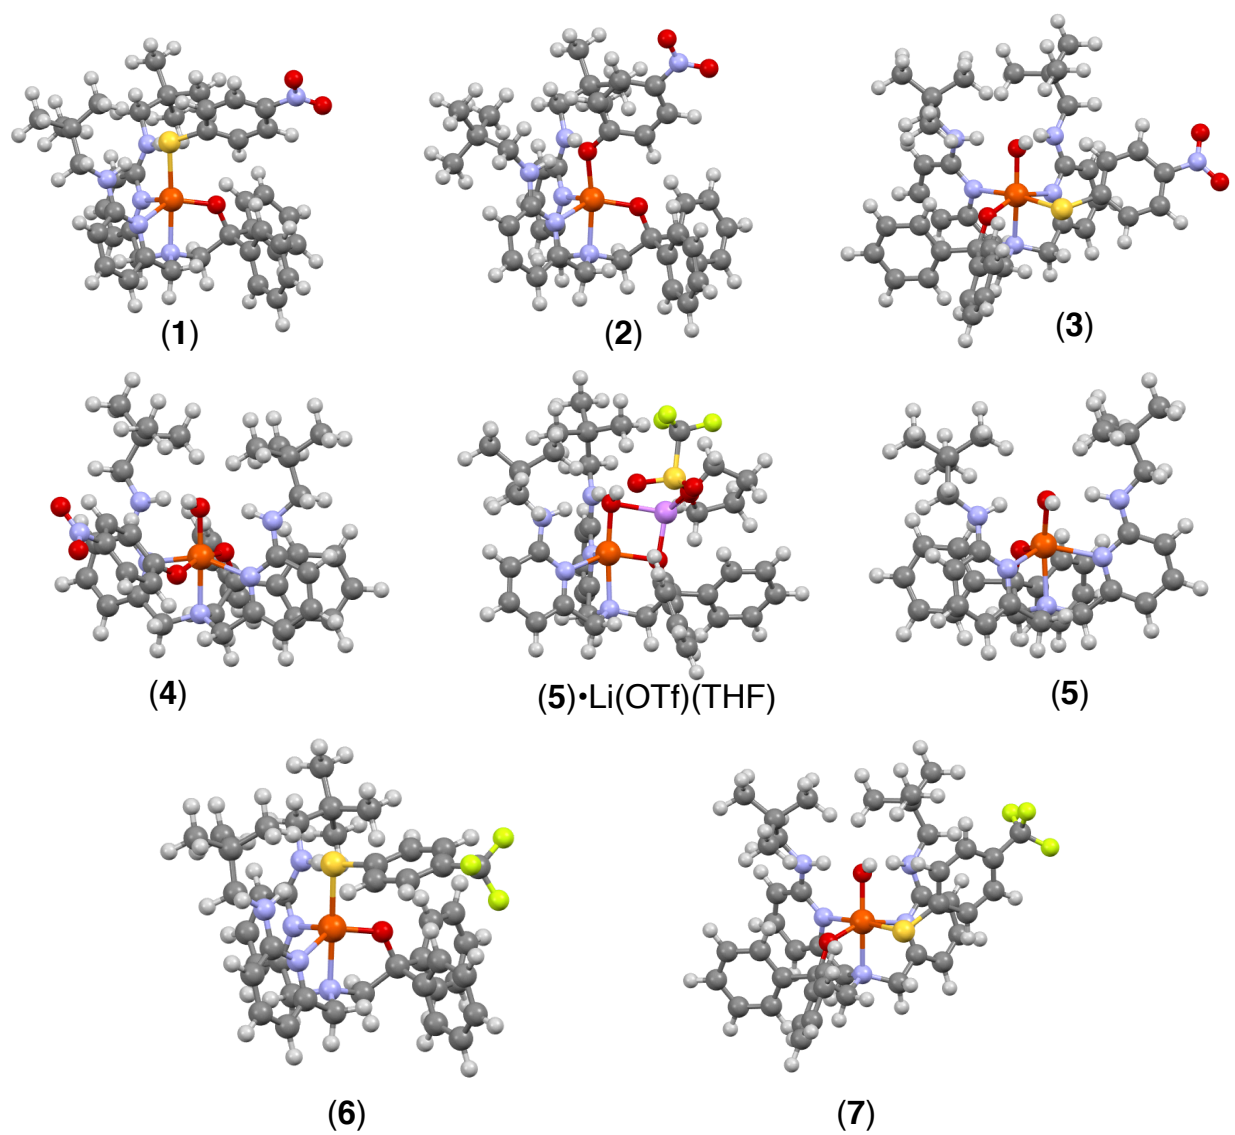

**Figure S39.** DFT optimized geometries of **1** – **7**.

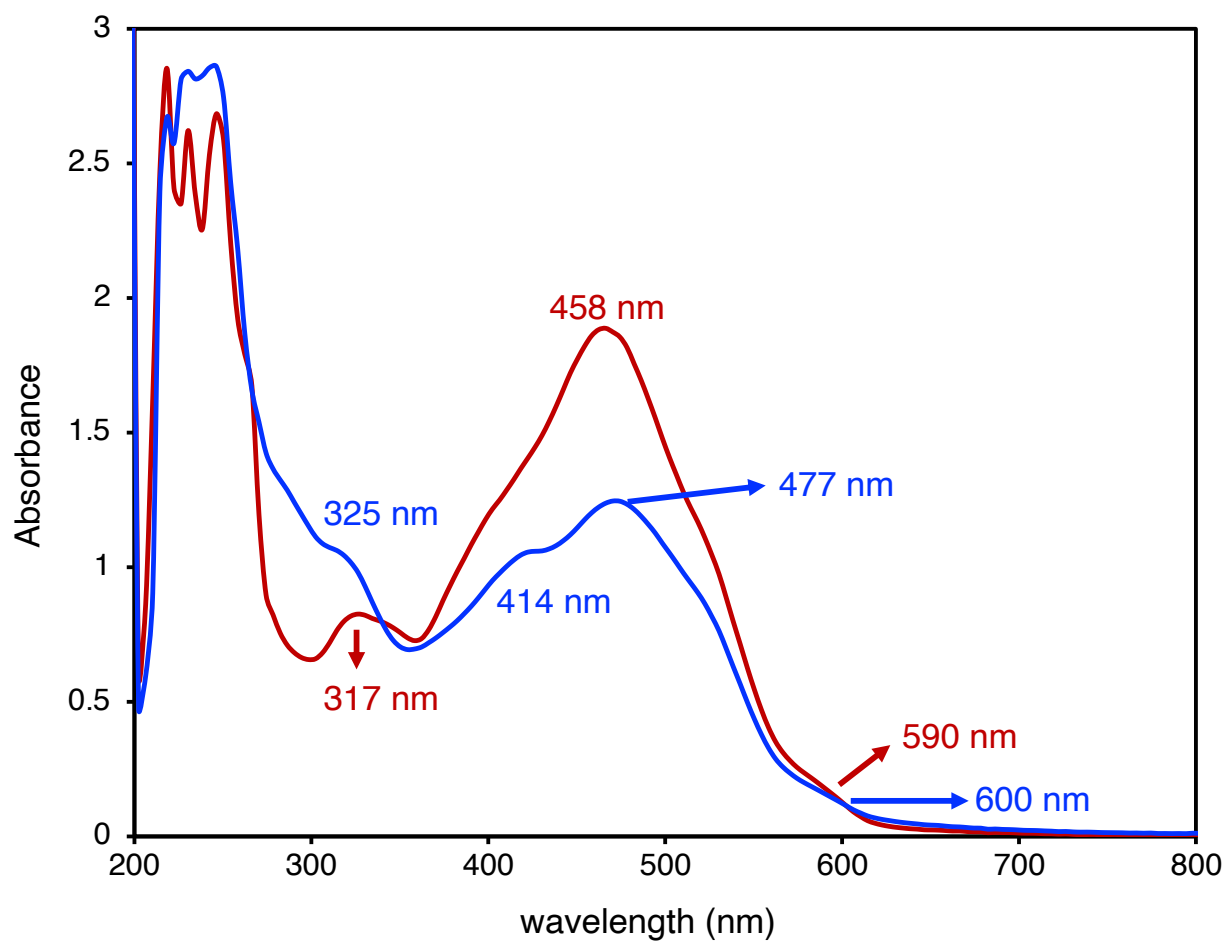

**Figure S40.** UV-vis spectra of **1** (red) and **3** (blue) in THF (57  $\mu$ M) at 23  $^{\circ}$ C.



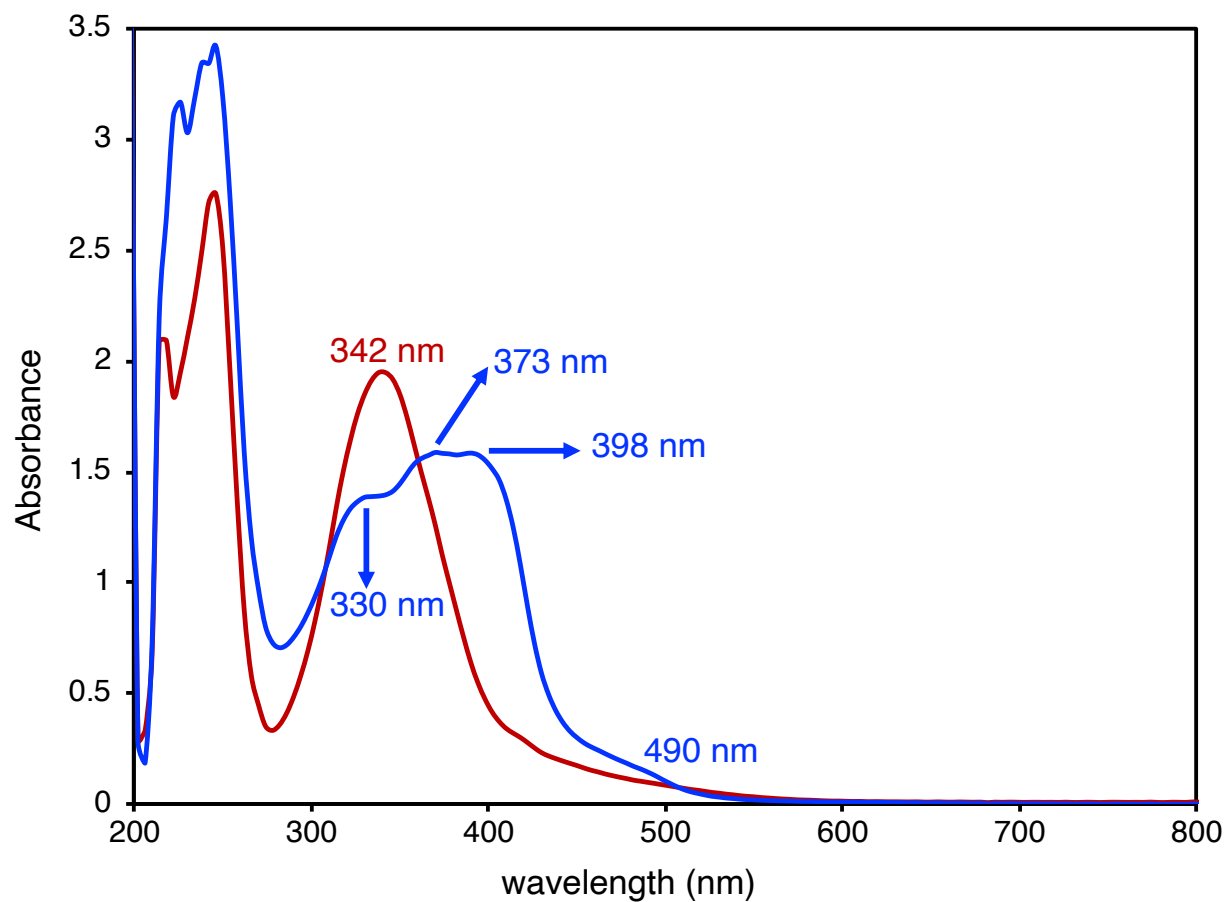

**Figure S41.** UV-vis spectra of **2** (red) and **4** (blue) in THF (56 μM) at 23 °C.

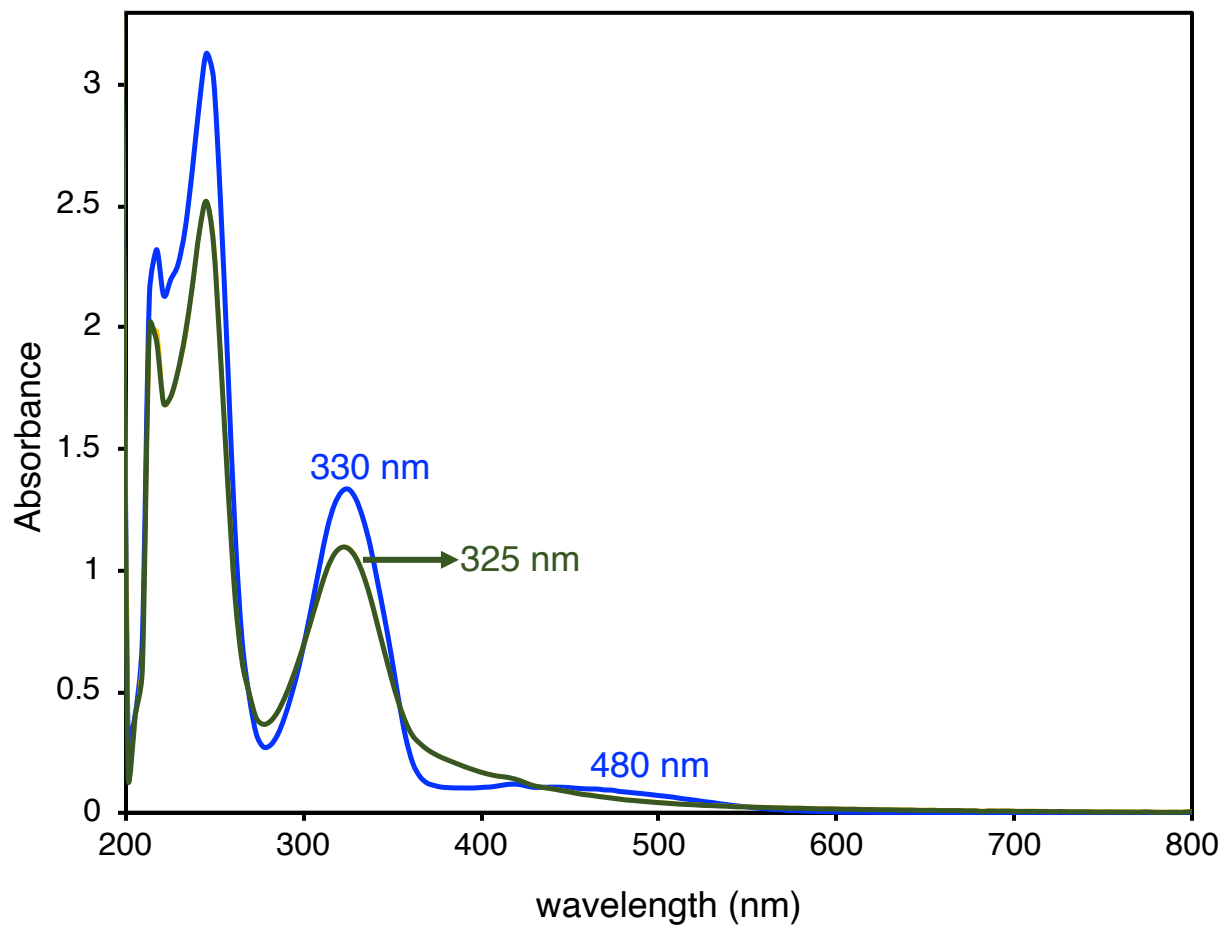

**Figure S42.** UV-vis spectra of **5** (green) (114  $\mu\text{M}$ ) and  $5 \cdot \text{Li}(\text{OTf})(\text{THF})$  (blue) (110  $\mu\text{M}$ ) in THF at 23  $^{\circ}\text{C}$ .

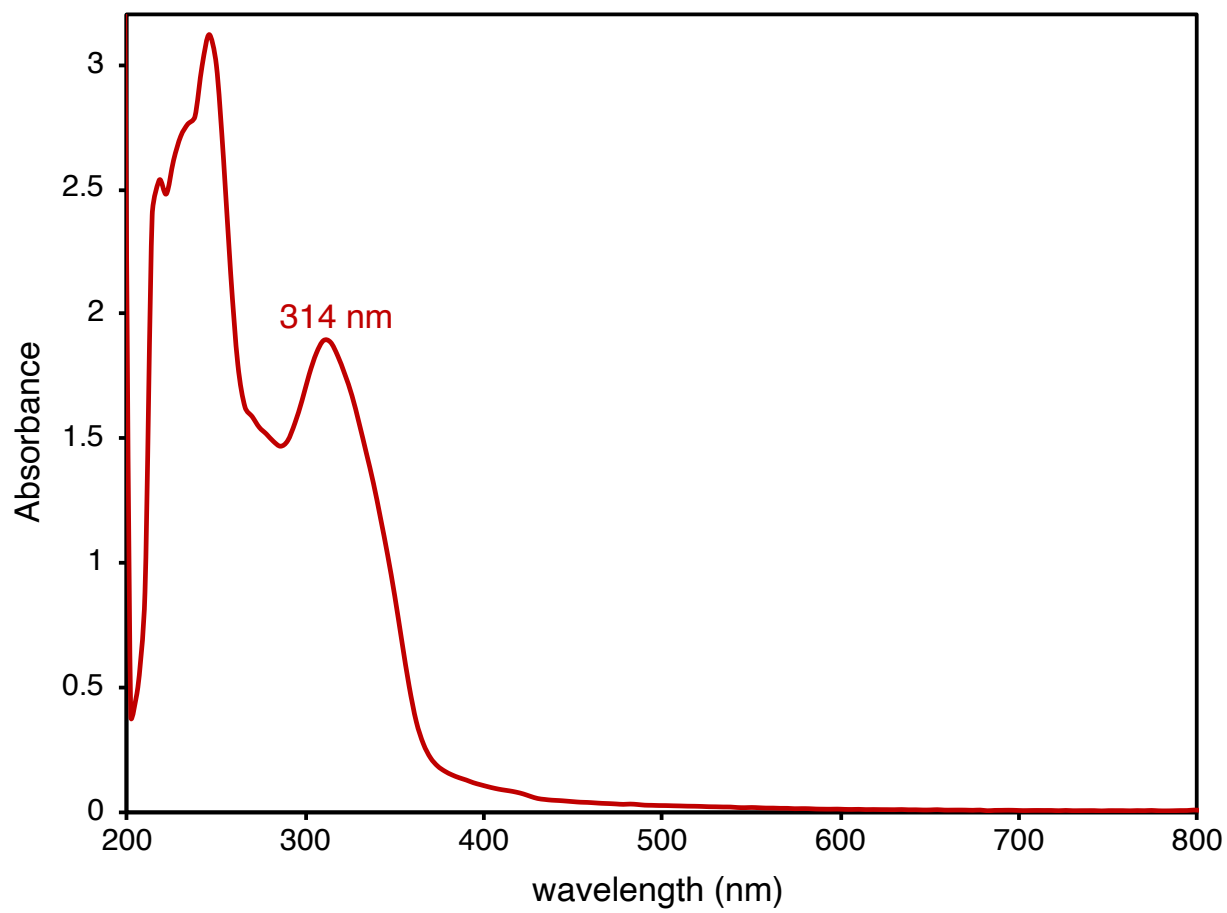

**Figure S43.** UV-vis spectrum of **6** in THF (114  $\mu$ M) at 23  $^{\circ}$ C.

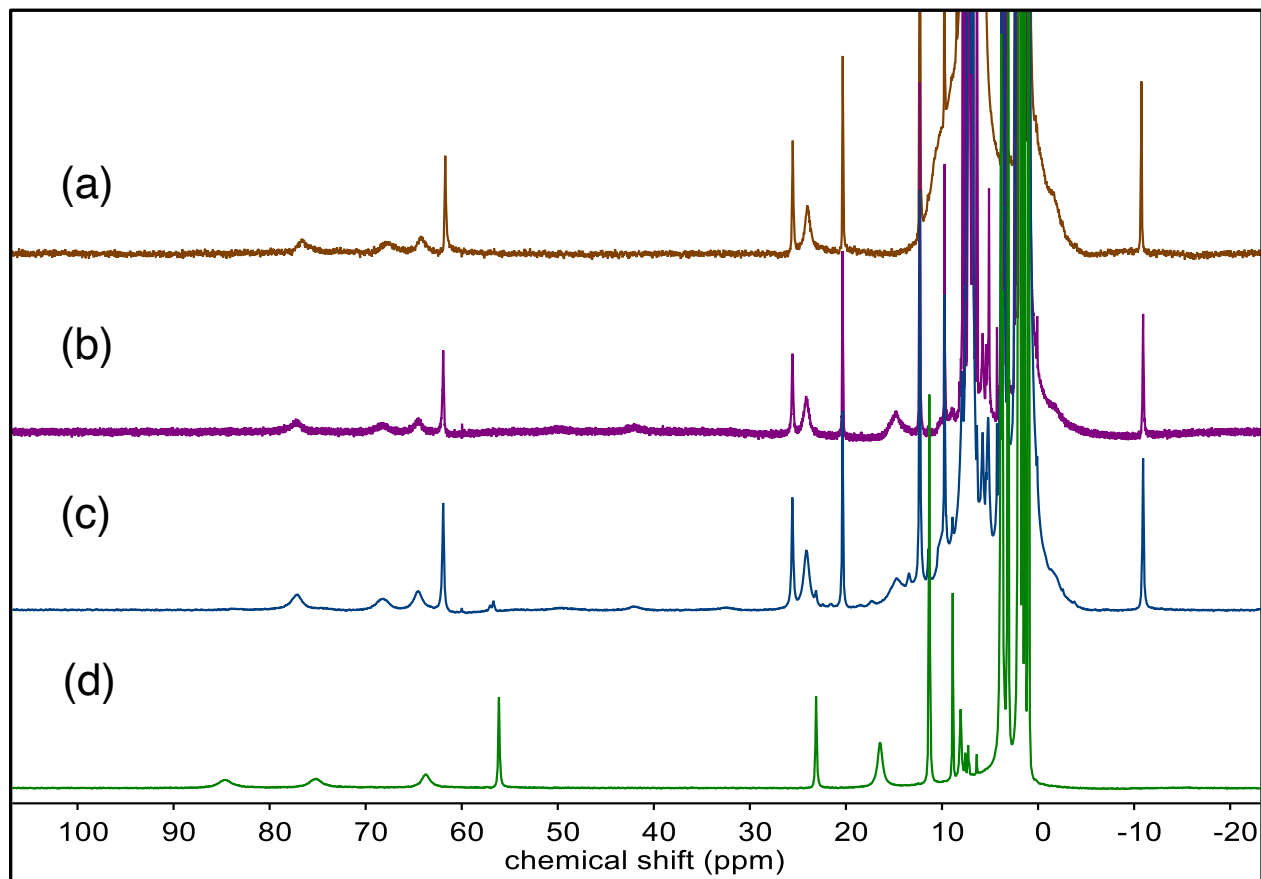

**Figure S44.**  $^1\text{H}$  NMR spectra of (a) **2**, (b) reaction of 1:1 mixture of **3** and **4** with (*p*-OMe- $\text{C}_6\text{H}_4$ ) $_3\text{C}\cdot$  at 23 °C, (c) reaction of 1:1 mixture of **3** and **4** with (*p*-OMe- $\text{C}_6\text{H}_4$ ) $_3\text{C}\cdot$  at - 35 °C and (d) **5** in  $\text{CD}_3\text{CN}$ .

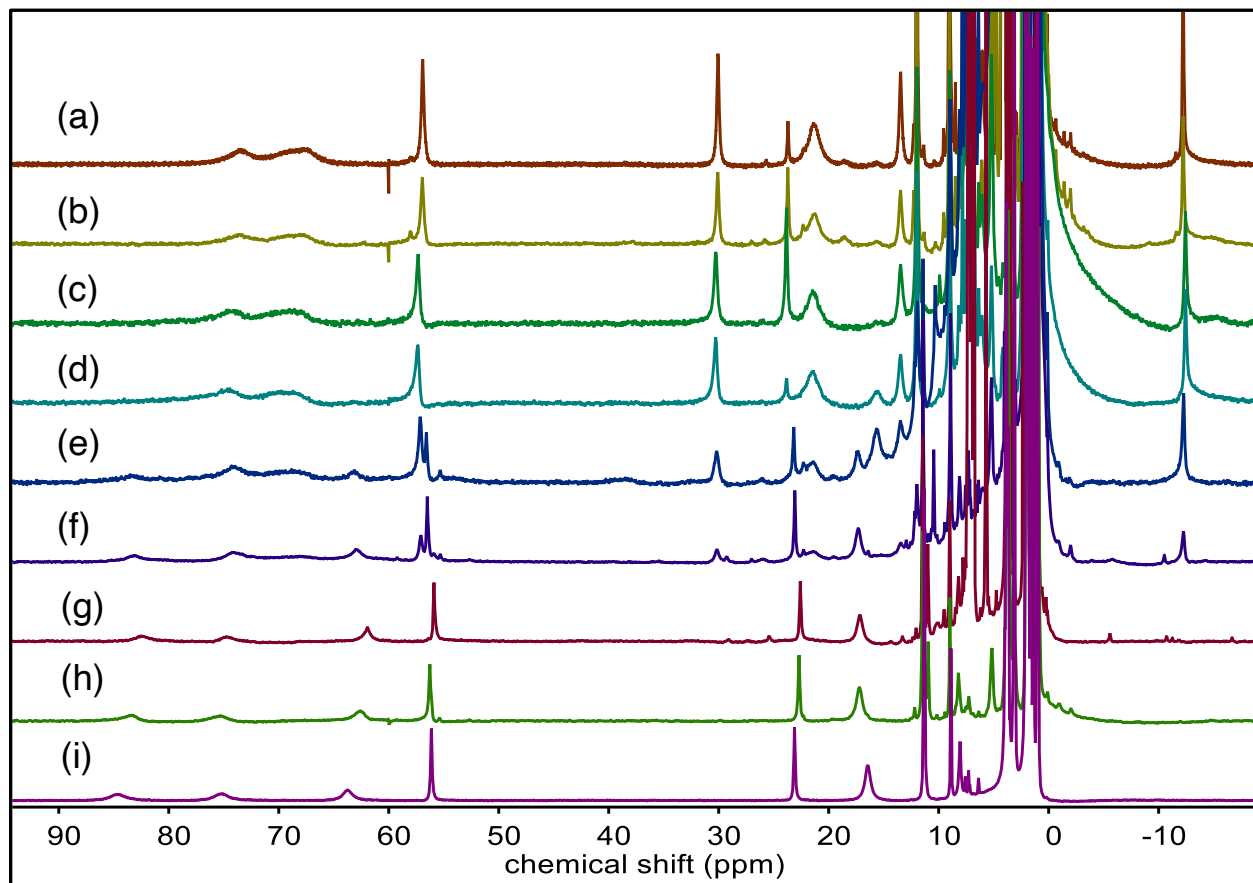

**Figure S45.** <sup>1</sup>H NMR spectra of (a) **1**, (b – h) reaction of **3** with (*p*-OMe-C<sub>6</sub>H<sub>4</sub>)<sub>3</sub>C• at temperatures +23 °C, +15 °C, +5 °C, -5 °C, -15 °C, -25 °C, -35 °C respectively (i) **5** in CD<sub>3</sub>CN.

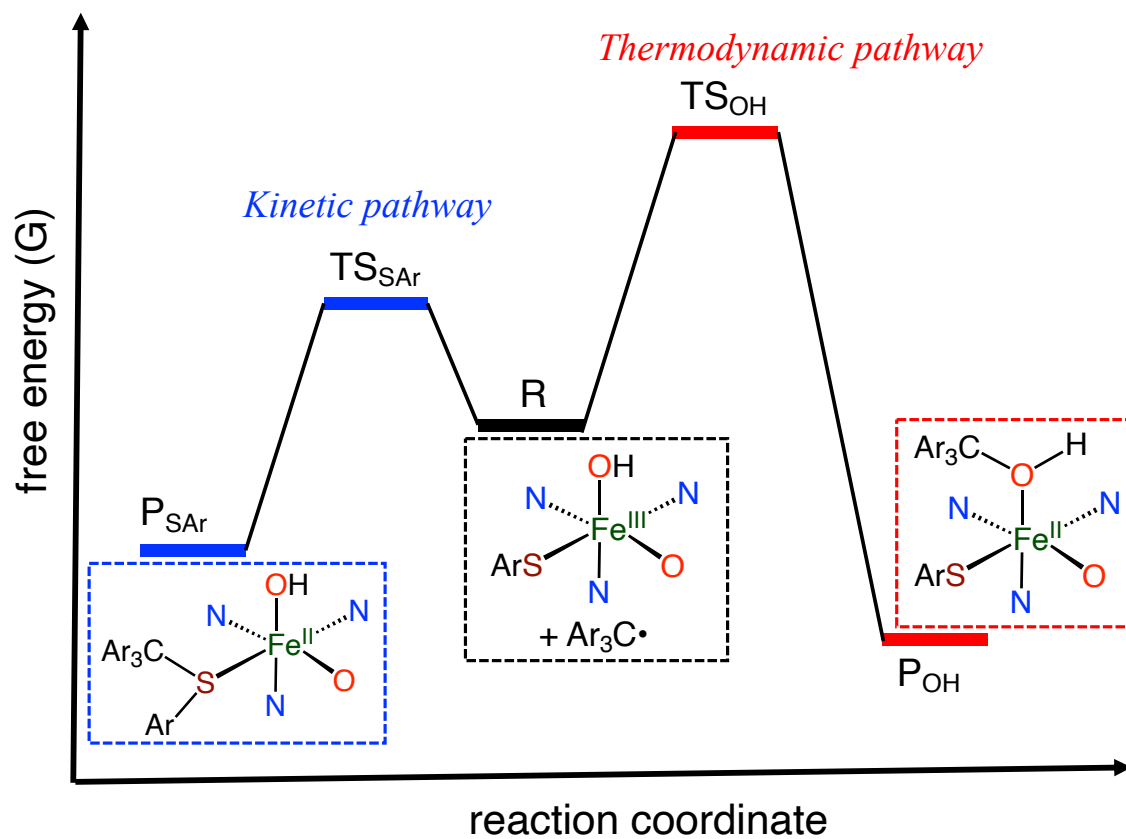

**Figure S46.** Proposed Reaction Coordinate Diagram.

## F. References

1. Albano, S.; Olivo, G.; Mandolini, L.; Massera, C.; Ugozzoli, F.; Di Stefano, S., Formation of Imidazo[1,5-a]pyridine Derivatives Due to the Action of Fe<sup>2+</sup> on Dynamic Libraries of Imines. *J. Org. Chem.* **2017**, *82*, 3820.
2. Yadav, V.; Gordon, J. B.; Siegler, M. A.; Goldberg, D. P., Dioxygen-Derived Nonheme Mononuclear Fe<sup>III</sup>(OH) Complex and Its Reactivity with Carbon Radicals. *J. Am. Chem. Soc.* **2019**, *141*, 10148.
3. Zaragoza, J. P. T.; Yosca, T. H.; Siegler, M. A.; Moëne-Loccoz, P.; Green, M. T.; Goldberg, D. P., Direct Observation of Oxygen Rebound with an Iron-Hydroxide Complex. *J. Am. Chem. Soc.* **2017**, *139*, 13640.
4. Fulmer, G. R.; Miller, A. J. M.; Sherden, N. H.; Gottlieb, H. E.; Nudelman, A.; Stoltz, B. M.; Bercaw, J. E.; Goldberg, K. I., NMR Chemical Shifts of Trace Impurities: Common Laboratory Solvents, Organics, and Gases in Deuterated Solvents Relevant to the Organometallic Chemist. *Organometallics* **2010**, *29*, 2176-2179.
5. Sheldrick, G., Crystal structure refinement with SHELXL. *Acta Cryst.* **2015**, *71*, 3.
6. Neese, F., Software update: the ORCA program system, version 4.0. *WIREs Comput. Mol. Sci* **2018**, *8*, 1327.
7. Stephens, P. J.; Devlin, F. J.; Chabalowski, C. F.; Frisch, M. J., Ab Initio Calculation of Vibrational Absorption and Circular Dichroism Spectra Using Density Functional Force Fields. *J. Phys. Chem.* **1994**, *98*, 11623.
8. Römelt, M.; Ye, S.; Neese, F., Calibration of Modern Density Functional Theory Methods for the Prediction of <sup>57</sup>Fe Mössbauer Isomer Shifts: Meta-GGA and Double-Hybrid Functionals. *Inorg. Chem.* **2009**, *48*, 784.
9. Weigend, F.; Ahlrichs, R., Balanced basis sets of split valence, triple zeta valence and quadruple zeta valence quality for H to Rn: Design and assessment of accuracy. *Phys. Chem. Chem. Phys.* **2005**, *7*, 3297.
10. Pápai, M.; Vankó, G., On Predicting Mössbauer Parameters of Iron-Containing Molecules with Density-Functional Theory. *J. Chem. Theory Comput.* **2013**, *9*, 5004.
11. Karim, A.; Schulz, N.; Andersson, H.; Nekoueishahraki, B.; Carlsson, A.-C. C.; Sarabi, D.; Valkonen, A.; Rissanen, K.; Gräfenstein, J.; Keller, S.; Erdélyi, M., Carbon's Three-Center, Four-Electron Tetrel Bond, Treated Experimentally. *J. Am. Chem. Soc.* **2018**, *140*, 17571.
